# Supplementary material for: Pharmacist intervention for glycaemic control in the community (the RxING study)
Source: PubMed Central journal article supplement — BMJ Open. 2013 Sep 24;3(9):e003154. doi: 10.1136/bmjopen-2013-003154 (PMC3787489; doi:10.1136/bmjopen-2013-003154), 2013-09-24
Supplement: bmjopen-2013-003154.draft_revisions.pdf [file bmjopen-2013-003154.draft_revisions.pdf]

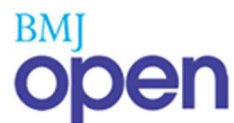

**Pharmacist Intervention for Glycemic Control in the  
Community (The RxING study)**

|                                    |                                                                                                                                                                                                                                         |
|------------------------------------|-----------------------------------------------------------------------------------------------------------------------------------------------------------------------------------------------------------------------------------------|
| Journal:                           | <i>BMJ Open</i>                                                                                                                                                                                                                         |
| Manuscript ID:                     | bmjopen-2013-003154                                                                                                                                                                                                                     |
| Article Type:                      | Research                                                                                                                                                                                                                                |
| Date Submitted by the Author:      | 03-May-2013                                                                                                                                                                                                                             |
| Complete List of Authors:          | Al Hamarneh, Yazid; University of Alberta, Medicine<br>Charrois, Theresa; Curtin University, Pharmacy<br>Lewanczuk, Richard; University of Alberta, Medicine<br>Tsuyuki, Ross; University of Alberta, Faculty of Medicine and Dentistry |
| <b>Primary Subject<br>Heading</b>: | Diabetes and endocrinology                                                                                                                                                                                                              |
| Secondary Subject Heading:         | Diabetes and endocrinology, Public health                                                                                                                                                                                               |
| Keywords:                          | Diabetes, HbA1c, Pharmacist, insulin glargine                                                                                                                                                                                           |
|                                    |                                                                                                                                                                                                                                         |

SCHOLARONE™  
Manuscripts

1  
2  
3 **Pharmacist Intervention for Glycemic Control in the Community (The RxING study)**  
4

5 Yazid N Al Hamarneh, PhD, EPICORE Centre, Division of Cardiology, Department of  
6  
7  
8 Medicine, University of Alberta  
9

10 Theresa Charrois, MSc, School of Pharmacy, Curtin University  
11

12 Richard Lewanczuk, MD, PhD, Department of Medicine, University of Alberta  
13

14  
15 Ross T Tsuyuki, PharmD, MSc, Professor of Medicine and Director, EPICORE Centre, Division  
16  
17 of Cardiology, Department of Medicine, University of Alberta (Corresponding author)  
18

19  
20 EPICORE Centre  
21

22 220 College Plaza  
23

24 University of Alberta  
25

26  
27 Edmonton, Alberta  
28

29 T6G 2C8  
30

31 Tel: 780-492-8526  
32

33 Fax: 780-492-6059  
34

35  
36 [ross.tsuyuki@ualberta.ca](mailto:ross.tsuyuki@ualberta.ca)  
37  
38  
39  
40

41 Word count: 1881  
42

43 References: 17  
44

45 Tables: 2  
46  
47

48 Figures: 3  
49  
50  
51  
52  
53  
54  
55  
56  
57  
58  
59  
60

## Abstract

Objective: To determine the effect of a community pharmacist prescribing intervention on glycemic control in patients with poorly controlled type 2 diabetes.

Design: Pragmatic, before-after design

Setting: 12 community pharmacies in Alberta, Canada.

Participants: Type 2 diabetes receiving oral hypoglycemic medications and with HbA1c of 7.5-11%

Intervention: Pharmacists systematically identified potential candidates by inviting patients with Type 2 diabetes to test their HbA1c using validated point of care technology (DCA Vantage®). Pharmacists prescribed 10 units of insulin glargine at bedtime, adjusted by increments of 1 unit daily to achieve a morning fasting glucose of  $\leq 5.5$  mmol/L. The patients were followed at 2, 4, 8, 14, 20, and 26 weeks.

Primary outcome: Change in HbA1c from baseline to week 26.

Secondary outcomes: Proportion of patients achieving target HbA1c, changes in oral hypoglycemic agents, persistence on insulin glargine, number of insulin dosage adjustments per patient and number of hypoglycemic episodes.

Results: We screened 365 patients of which 111 were eligible. Of those, 100 (90%) were enrolled in the study; all 11 patients who did not consent refused to use insulin.

Average age was 64 years (standard deviation (SD) 10.4), while average diabetes duration was 10.2 years (SD 7). HbA1c was reduced from 9.1% (SD 1) at baseline to 7.3% (SD 0.9) a change of 1.8% ( $p < 0.001$ ). Fasting plasma glucose was reduced from 11 mmol/l (SD 3.3) to 6.9 mmol/l (SD 1.8), a change of 4.1 mmol/l ( $p=0.007$ ). Fifty one percent of the patients achieved the target HbA1c of  $\leq 7\%$  at the end of the study.

1  
2  
3 Conclusion: This is the first completed study of independent prescribing by pharmacists. Our  
4  
5 results showed similar improvements in glycaemic control as previous physician-led studies.  
6  
7

8 RxING provides further evidence for the benefit of pharmacist care in diabetes.  
9

10 Trial registration: [clinicaltrials.gov](http://clinicaltrials.gov); Identifier: NCT01335763  
11  
12  
13  
14  
15  
16  
17  
18  
19  
20  
21  
22  
23  
24  
25  
26  
27  
28  
29  
30  
31  
32  
33  
34  
35  
36  
37  
38  
39  
40  
41  
42  
43  
44  
45  
46  
47  
48  
49  
50  
51  
52  
53  
54  
55  
56  
57  
58  
59  
60

For peer review only

## Article summary

### Article focus:

To determine the effect of a community pharmacist prescribing intervention on glycaemic control in patients with poorly controlled type 2 diabetes.

### Key Messages:

- Community pharmacist prescribing intervention on glycaemic control in patients with poorly controlled type 2 diabetes reduced patients' HbA1c from 9.1% at baseline to 7.3% at 26 weeks, a change of 1.8%. While fasting plasma glucose (FPG) was reduced from 11 mmol/L at baseline to 6.9 mmol/L at 26 weeks, a change of 4.1 mmol/L
- Pharmacists can systematically identify patients with poor glycaemic control, educate and support them to achieve better outcomes
- Since pharmacists see patients with diabetes frequently, we recommend getting the pharmacists more involved in delivering the care for patients with type 2 diabetes

### Strengths and limitations of the study:

- This is the first study of independent prescribing by pharmacists in patients with diabetes and it demonstrates a clinically important improvement in glycaemic control.
- The 26 week follow up period can be considered relatively short; it is possible that with a longer study more patients may have achieved the target HbA1c (or fewer if patients discontinued their insulin).
- We did observe a number of "hypoglycaemic-type symptoms", however we were not able to confirm these as true hypoglycemia. We also have no frame of reference as patients may have experienced some of these symptoms prior to enrolling in our study. Finally,

1  
2  
3 the number of reported “hypoglycemic-type symptoms” in this study was consistent with  
4  
5 the findings reported in the literature.  
6  
7  
8  
9

10 **Financial acknowledgements:** This work was supported by unrestricted investigator-initiated  
11 funding provided by Sanofi Canada and the testing equipments were provided by ManthaMed.  
12  
13

14  
15  
16 **Role of the Sponsors:** The funders had no role in the design and conduct of the study; in the  
17 collection, analysis, and interpretation of the data; or in the preparation, review, or approval of  
18 the manuscript.  
19  
20  
21  
22  
23  
24  
25  
26  
27  
28  
29  
30  
31  
32  
33  
34  
35  
36  
37  
38  
39  
40  
41  
42  
43  
44  
45  
46  
47  
48  
49  
50  
51  
52  
53  
54  
55  
56  
57  
58  
59  
60

Peer review only

## Introduction

Currently, 347 million individuals are living with diabetes worldwide (1). Approximately 90% of those individuals have type 2 diabetes (1). The number of new cases of type 2 diabetes is rapidly increasing mainly because of obesity and an ageing population (2).

Because of its chronic nature and the severe complications associated with it, diabetes carries a health and a financial burden on the affected individual and health systems (3). Poorly controlled diabetes puts patients at high risk of suffering from macrovascular and microvascular complications (4).

Type 2 diabetes is a progressive disease; it has been reported that 50% of the insulin producing capacity is lost at the time of diagnosis with an average loss rate of 5% per year afterwards (5).

As a result, many patients with type 2 diabetes will eventually require the use of insulin; however, clinicians seem reluctant to start insulin (6) despite the evidence from studies such as INSIGHT, which demonstrated improved glycemic control with the addition of insulin glargine to oral hypoglycemic agents in patients with type 2 diabetes (7) as well as guidelines that recommending starting insulin immediately if the patients HbA1c is  $\geq 9\%$  (8).

Pharmacists are front line healthcare professionals who see patients with diabetes more frequently than physicians (15 times/year Vs 7 times/year) (9) and as such, could proactively and systematically identify patients with poorly controlled type 2 diabetes in a broad-based public health approach to chronic disease management. Indeed, there is good evidence for the efficacy

1  
2  
3 of pharmacist care in diabetes (10). Moreover, the scope of practice for pharmacists is changing,  
4  
5 allowing pharmacists to prescribe medications and order laboratory tests. As such, there is an  
6  
7 unprecedented opportunity to identify and improve glycemic control in patients with type 2  
8  
9 diabetes.  
10  
11

12  
13  
14  
15 The main aim of the RxING study was to determine the effect of a community pharmacist  
16  
17 prescribing intervention on glycemic control in patients with poorly controlled type 2 diabetes.  
18  
19

## 20 21 22 **Methods**

23  
24 RxING was a multicentre pragmatic before-after design trial, which was conducted in 12  
25  
26 community pharmacies in the province of Alberta, Canada.  
27  
28

29  
30 We recruited adults who had physician diagnosed type 2 diabetes for at least six months and  
31  
32 were receiving one or more oral hypoglycemic agents, had a HbA1c between 7.5% and 11%, and  
33  
34 who were willing to sign an informed consent.  
35  
36  
37

38  
39 We excluded patients who were unwilling to use insulin, previously or currently using insulin,  
40  
41 had a history of ketoacidosis, were pregnant, worked night shifts, had renal impairment (serum  
42  
43 creatinine of  $\geq 124$  mmol/l for females or  $\geq 133$  mmol/l for males), were clinically unstable,  
44  
45 were unwilling or unable to attend follow-up visits, or felt to be unlikely to adhere to study  
46  
47 procedures due to cognitive limitations, severe psychiatric disorders or alcoholism.  
48  
49  
50  
51  
52  
53  
54  
55  
56  
57  
58  
59  
60



1  
2  
3 Pharmacists systematically identified potential candidates by inviting patients with type 2  
4 diabetes (e.g. patients on metformin) to test their HbA1c in the pharmacy using validated point  
5 of care technology (DCA Vantage®, Siemens, Tarrytown, New York, USA). If the result of the  
6 HbA1c test was high (7.5-11 %) and the patient met the other inclusion criteria for the study the  
7 patient was asked if he/she wanted to participate in the study. After providing written informed  
8 consent, the patient was enrolled in the study. If HbA1c was > 11% the patient was assessed by  
9 the study investigators, and the patient was referred to his/her physician.  
10  
11  
12  
13  
14  
15  
16  
17  
18  
19  
20  
21

22 Intervention: The patient was prescribed 10 units insulin glargine at bedtime, and was asked to  
23 titrate the dose by 1 unit/day to achieve a fasting plasma glucose of  $\leq 5.5$  mmol/L (7, 11). The  
24 intervention also included patient education regarding insulin use, dose titration and self  
25 monitoring. Patients contacted the pharmacist when they reached a fasting plasma glucose of 6  
26 mmol/L. All patients remained on their previously prescribed oral hypoglycemic agent(s).  
27  
28  
29  
30  
31  
32  
33

34 Adjustments were made at the discretion of the treating pharmacist. The patient's family  
35 physician received a letter from the pharmacist to inform him/her that the patient was  
36 participating in the study.  
37  
38  
39  
40  
41  
42

43 Follow-up: Patients were followed at 2, 4, 8, 14, 20, and 26 weeks to provide ongoing care,  
44 check adherence to the insulin regimen, fasting blood sugars (measured by the patient), insulin  
45 dose and titration and adverse events. HbA1c was measured at weeks 14 and 26 using the same  
46 technique used at baseline. Family physicians were kept informed of patient's progress and any  
47 medication change after each visit.  
48  
49  
50  
51  
52  
53  
54  
55  
56  
57  
58  
59  
60

1  
2  
3 The primary outcome measure was the change in HbA1c from baseline to week 26. Secondary  
4  
5 outcomes included: Proportion of patients achieving target HbA1c (defined as HbA1c  $\leq$ 7.0%),  
6  
7 changes in oral hypoglycemic agents, persistence on insulin glargine (% still taking insulin at the  
8  
9 end of follow-up), number of insulin dosage adjustments per patient, number of hypoglycemic  
10  
11 episodes.  
12  
13

14  
15  
16  
17 With a sample size of 80 patients and the following assumptions: a standard deviation of 1.1 and  
18  
19 a 2 sided alpha of 0.05 (7) we calculated 90% power to detect a mean decrease in HbA1c of  
20  
21 0.4%. Since this a pragmatic, practice-based trial, the sample size was inflated to 100 to account  
22  
23 for possible losses to follow-up.  
24  
25  
26  
27

28  
29 The level of significance was set at 0.05. All analyses were done on intention to treat basis.

30  
31 Missing data were imputed using a last value carried forward strategy. The primary outcome was  
32  
33 analyzed using t-test after adjusting for the patients' demographics and clinical characteristics.  
34  
35

36  
37 The secondary outcomes were analyzed using t-test and basic frequencies after adjusting for the  
38  
39 patients' demographics and clinical characteristics.  
40  
41

42  
43 RxING was approved by the Health Research Ethics Board of the University of Alberta and was  
44  
45 registered on clinicaltrials.gov (NCT01335763).  
46  
47  
48  
49  
50  
51  
52  
53  
54  
55  
56  
57  
58  
59  
60

## Results

We screened 356 patients with type 2 diabetes; 245 were excluded because they did not meet the HbA1c inclusion criteria. Out of the 111 eligible patients, 11 were not enrolled because they refused to use insulin, leaving 100 patients enrolled (Figure 1)

The demographic and clinical characteristics of the patients are reported in Table 1. The mean age was 64 years (Standard Deviation (SD) 10.4) and had a diabetes duration of 10.2 years (SD 7). Fifty-eight percent of the patients were male, 77% were married and 90% reported having at least high school education. Nearly half of the patients (48%) were retired, almost ninety percent (89%) were white (ethnicity was self reported) and nearly half (47%) have a government medication coverage. Around one quarter of the patients (22%) reported that they were smokers, More than half (54%) reported occasional consumption of alcohol (e.g. 1-3 drinks/week), almost half (47%) reported not using any specific diet for their diabetes, more than half (51%) reported being moderately active (exercising for 30 minutes less than 5 times per week) and more than four fifths (85%) reported living at least a mildly stressful life.

All but 1 patient was taking insulin glargine at the end of the study (he stopped his insulin before the final visit because his plasma glucose readings were “good”). At the end of the study the mean insulin glargine dose was 31.1 units (SD 18.4) with a mean of 21.1 dose adjustments (SD 18.8) per patient.

1  
2  
3 HbA1c was reduced from 9.1% (SD 1) at baseline to 7.3% (SD 0.9) at 26 weeks, a change of  
4  
5 1.8% (95% CI 1.4-2,  $p < 0.001$ ) (Figure 2). While fasting plasma glucose (FPG) was reduced from  
6  
7 11 mmol/L (SD 3.3) at baseline to 6.9 mmol/L (SD 1.8) at 26 weeks, a change of 4.1 mmol/L  
8  
9 (95% CI of 3.3-5,  $p = 0.007$ ) (Figure 3)  
10  
11

12  
13  
14  
15 Fifty one percent of the patients achieved the target HbA1c of  $\leq 7\%$  at the end of the study.  
16

17  
18 Nearly half of the patients (48%) had their oral hypoglycemic regimen altered (Table 2); the  
19  
20 most frequent alterations were stopping sulfonylurea (46%) followed by initiating meglitinides  
21  
22 (23%), stopping metformin (21%) and stopping thiazolidinedione and DPP4 inhibitors (19%).  
23  
24

25  
26  
27 There was an apparent slight increase in the body mass index (BMI) and waist circumference  
28  
29 between baseline and the end of the study but this increase was not statistically significant (31.6  
30  
31 (SD 6.3) to 32.6 (SD 6.3),  $p = 0.29$  and 106 (SD 13.8) to 107.4 (SD 12.9),  $p = 0.5$  respectively).  
32  
33

34  
35  
36 Hypoglycemic symptoms were reported by 54 patients. Only 2 of these episodes required  
37  
38 medical attention; one caused a visit to the family physician while the other required a visit to the  
39  
40 emergency department without an overnight stay. We were not able to confirm that these  
41  
42 episodes were true hypoglycemia (we were not able to confirm blood sugars associated with  
43  
44 these events).  
45  
46  
47  
48  
49  
50  
51  
52  
53  
54  
55  
56  
57  
58  
59  
60

## Discussion

We found that a community pharmacist prescribing intervention on glycaemic control in patients with poorly controlled type 2 diabetes reduced patients' HbA1c by an absolute value of 1.8% (95% CI 1.4-2,  $p < 0.001$ ) and improved fasting plasma glucose by 4.1 mmol/L (95% CI of 3.3-5,  $p = 0.007$ ). This is the first study of independent prescribing by pharmacists in patients with diabetes and demonstrates a clinically important improvement in glycaemic control.

Our findings are consistent with the findings of Gerstein and colleagues (2006) and Harris and colleagues (2008) who compared the effect of adding insulin glargine to the oral hypoglycaemic regimen versus the conventional therapy where oral hypoglycaemic agent doses were adjusted. They reported better glycaemic control in the insulin glargine group after 26 weeks of follow up (7, 12). Our findings are also consistent with the findings of Wubben and Vivian (2008) who conducted a systematic review to assess the effectiveness of pharmacist intervention in patients with diabetes in outpatient settings. They reported additional HbA1c reduction (when compared to usual care) of 0.5% when pharmacists did not have prescribing authority and 1% when pharmacists had prescribing authority (collaborative prescribing in this case) (10).

It has been reported in the literature that the adherence rates to the insulin regimen are unsatisfactory (14); however in our study, 99% of the patients were adherent to their treatment regimen for 6 months, this can be explained by the intensive intervention provided by the pharmacist and the relatively short duration of the study.

1  
2  
3 The slight increase in BMI and waist circumference in our study is consistent with the findings  
4  
5 of Heine and colleagues (2005) and Russell-Jones and colleagues (2009) who compared the  
6  
7 efficacy of insulin glargine to an active diabetes treatment and reported that there was a slight  
8  
9 increase in BMI and waist circumference in patients who used insulin glargine after 26 weeks  
10  
11 (15, 16).  
12  
13

14  
15  
16  
17 This study is not without limitations. The 26 week follow up period can be considered relatively  
18  
19 short; it is possible that with a longer study more patients may have achieved the target HbA1c  
20  
21 (or fewer if patients discontinued their insulin). We did observe a number of “hypoglycemic-type  
22  
23 symptoms”, however we were not able to confirm these as true hypoglycemia. We also have no  
24  
25 frame of reference as patients may have experienced some of these symptoms prior to enrolling  
26  
27 in our study. Finally, the number of reported “hypoglycemic-type symptoms” in this study was  
28  
29 consistent with the findings of a meta analysis of more than 1100 diabetes patients who were  
30  
31 using insulin glargine (17).  
32  
33  
34  
35  
36  
37  
38

39 Our findings take the evidence for the benefits of pharmacist care in diabetes one step further.  
40  
41 That prescribing insulin improves glycemc control in itself is perhaps not surprising; what is  
42  
43 important is that pharmacists can systematically identify patients with poor glycemc control,  
44  
45 educate and support patients to achieve better outcomes. Since pharmacists see patients with  
46  
47 diabetes frequently (9), this is an attractive approach which should be implemented.  
48  
49  
50  
51  
52  
53  
54  
55  
56  
57  
58  
59  
60

1  
2  
3 **Acknowledgements:** The authors would like to acknowledge the participation of the following  
4 pharmacists and pharmacies in making this study possible: Rick Siemens ( London Drugs,  
5 Lethbridge), Darsey Milford ( Turtle Mountain Pharmacy, Bellevue), Rita Bowron, Rami  
6 Chowaniec, Nader Hammoud, Carol Wei, Sheilah Kostecki ( Safeway Pharmacy, Edmonton and  
7 Calgary), Anita Brown (Shoppers Drug Mart, Okotoks), Janelle Fox, Tony Nickonchuck  
8 (Walmart Pharmacy Cold Lake and Peace River), Rita Lyster (Rita's Apothecary and Home  
9 Healthcare, Barrhead) and Anita and Warren Dobson (Medicine Shoppe, Calgary).

10  
11  
12  
13 **Funding:** This work was supported by unrestricted investigator-initiated funding provided by  
14 Sanofi Canada and the testing equipments were provided by ManthaMed.

15  
16  
17  
18 **Role of the Sponsors:** The funders had no role in the design and conduct of the study; in the  
19 collection, analysis, and interpretation of the data; or in the preparation, review, or approval of  
20 the manuscript.

21  
22  
23  
24 **Contributors:** All the authors have made substantial contributions to the manuscript. These  
25 contributions are as the following: Al Hamarneh had full access to all of the data in the study and  
26 takes responsibility for the integrity of the data and the accuracy of the data analysis. *Study*  
27 *concept and design:* Tsuyuki and Charrois. *Acquisition of data:* Tsuyuki and Al  
28 Hamarneh. *Analysis and interpretation of data:* Tsuyuki and Al Hamarneh. *Drafting of the*  
29 *manuscript:* Tsuyuki and Al Hamarneh. *Critical revision of the manuscript for important*  
30 *intellectual content:* Tsuyuki, Lewanczuk, Charrois and Al Hamarneh. *Statistical analysis:*  
31 Tsuyuki and Al Hamarneh. *Administrative, technical, and material support:* Tsuyuki,  
32 Lewanczuk, Charrois and Al Hamarneh. *Study supervision:* Tsuyuki and Lewanczuk.

33  
34  
35  
36  
37  
38  
39  
40  
41  
42  
43  
44  
45  
46  
47  
48  
49  
50  
51  
52 **Competing interests:** None declared

53  
54  
55  
56  
57  
58  
59  
60 **Ethics approval:** Health Research Ethics Board of the University of Alberta

1  
2  
3  
4  
5  
6  
7  
8  
9  
10  
11  
12  
13  
14  
15  
16  
17  
18  
19  
20  
21  
22  
23  
24  
25  
26  
27  
28  
29  
30  
31  
32  
33  
34  
35  
36  
37  
38  
39  
40  
41  
42  
43  
44  
45  
46  
47  
48  
49  
50  
51  
52  
53  
54  
55  
56  
57  
58  
59  
60

**Data sharing statement:** All obtained data have been analysed and reported in the manuscript.

Any further queries can be resolved by contacting the authors

For peer review only



**References:**

1. World Health Organization. Diabetes. 2012. Available on:  
<http://www.who.int/mediacentre/factsheets/fs312/en/> (accessed February 2013).
2. Lipscombe LL, Hux JE. Trends in diabetes prevalence, incidence and mortality in Ontario, Canada 1995-2005: a population based study. *Lancet*. 2007; 369:750-756.
3. World Health Organization. Diabetes: the cost of diabetes. 2012. Available on:  
<http://www.who.int/mediacentre/factsheets/fs236/en/> (accessed February, 2013)
4. Al Hamarneh YN, Rosenthal M, Tsuyuki RT. Glycemic control in community-dwelling patients with type 2 diabetes. *Can Pharm J*. 2012; 2: 68-69e1.
5. Lebovitz HE. Insulin secretagogues: old and new. *Diabetes Rev*. 1999; 7:139-153.
6. Polonsky WH, Jackson RA. What's so tough about taking insulin? *Clin Diabetes*. 2004; 22:147-50.
7. Gerstein HC, Yale JF, Harris SB, et al. A randomized trial of adding insulin glargine vs. avoidance of insulin in people with Type 2 diabetes on either no oral glucose-lowering agents or submaximal doses of metformin and/or sulphonylureas. The Canadian INSIGHT study. *Diabet Med*. 2006;23:736-42.

- 1  
2  
3  
4  
5  
6 8. Canadian Diabetes Association. Canadian Diabetes Association 2008 Clinical Practice  
7  
8 Guidelines for the Prevention and Management of Diabetes in Canada. *Can J Diabetes.*  
9  
10 2008;32:s1-s201.  
11
- 12  
13  
14  
15  
16  
17 9. Shiu JR, Simpson SH, Johnson JA, Tsuyuki RT. Quantifying opportunities to affect  
18  
19 diabetes management in the community. *Can Pharm J.* 2006; 139(3): 37-38.  
20  
21
- 22  
23  
24 10. Wubben DP, Vivian EM. Effects of pharmacist outpatient interventions on adults with  
25  
26 diabetes mellitus: a systematic review. *Pharmacotherapy.* 2008; 28: 421-436.  
27  
28
- 29  
30  
31 11. Strange P. Treat-to-target insulin titration algorithms when initiating long or intermediate  
32  
33 acting insulin in type 2 diabetes. *J Diabetes Sci Technol.* 2007; 1: 540 -548.  
34  
35
- 36  
37  
38 12. Harris S, Yale JF, Dempsey E, Gerstein H. Can family physicians help patients initiate  
39  
40 basal insulin therapy successfully? Randomized trial of patient-titrated insulin glargine  
41  
42 compared with standard oral therapy: Lessons for family practice from Canadian INSIGHT  
43  
44 trial. *Can Fam Physicians.* 2008; 54: 550-558.  
45  
46  
47
- 48  
49  
50 13. Raskin P, Gylvin T, Weng W, Chaykin I. Comparison of insulin detemir and insulin  
51  
52 glargine using a basal-bolus regimen in a randomized, controlled clinical study in patients  
53  
54 with type 2 diabetes. *Diabetes Metab Res Rev.* 2009; 25: 542-548.  
55  
56  
57  
58  
59  
60

- 1  
2  
3  
4  
5  
6 14. Hartman I. Insulin Analogs: Impact on Treatment Success, Satisfaction, Quality of Life,  
7  
8 and Adherence. *Clin Med Res*. 2008; 6: 54-67.  
9  
10
- 11  
12 15. Heine RJ, Van Gaal LF, Johns D, et al. Exenatide versus Insulin Glargine in Patients with  
13 Suboptimally Controlled Type 2 Diabetes. A Randomized trial. *Ann Intern Med*. 2005;  
14  
15 143: 559-569.  
16  
17
- 18  
19 16. Russell-Jones D, Vaag A, Schmitz O, et al. Liraglutide vs insulin glargine and placebo in  
20 combination with metformin and sulfonylurea therapy in type 2 diabetes mellitus (LEAD-5  
21  
22 met+SU): a randomised controlled trial. *Diabetologia*. 2009; 52: 2046-2055.  
23  
24  
25  
26  
27
- 28  
29 17. Rosenstock J, Dailey G, Massi-Benedetti M, et al. Reduced hypoglycemia risk with insulin  
30 glargine in type 2 diabetes. *Diabetes Care*. 2005; 28:950-955.  
31  
32  
33  
34  
35  
36  
37  
38  
39  
40  
41  
42  
43  
44  
45  
46  
47  
48  
49  
50  
51  
52  
53  
54  
55  
56  
57  
58  
59  
60

Table 1 Demographic and clinical characteristics of the patients (N=100)

| <b>Characteristic</b>         | <b>Frequency</b> |
|-------------------------------|------------------|
| <b>Gender</b>                 |                  |
| Male                          | 58               |
| Female                        | 42               |
| <b>Marital status</b>         |                  |
| Single                        | 8                |
| Married                       | 77               |
| Divorced                      | 9                |
| Widowed                       | 6                |
| <b>Education</b>              |                  |
| Grade School                  | 10               |
| High School                   | 36               |
| Some post secondary education | 26               |
| Post secondary education      | 28               |
| <b>Employment</b>             |                  |
| Caring for family             | 1                |
| Working for profit/pay        | 36               |
| Unemployed/looking for a job  | 6                |
| Retired                       | 48               |
| Other                         | 9                |
|                               |                  |

|                                           |    |
|-------------------------------------------|----|
| <b>Self reported Ethnicity</b>            |    |
| Aboriginal/first nation                   | 1  |
| White                                     | 89 |
| South Asian                               | 1  |
| Oriental                                  | 4  |
| Other                                     | 4  |
| Declined                                  | 1  |
| <b>Medication coverage</b>                |    |
| Private                                   | 29 |
| Government                                | 47 |
| Out of pocket                             | 15 |
| Private and government                    | 7  |
| Private and out of pocket                 | 2  |
| <b>Smoking status</b>                     |    |
| Smoker                                    | 22 |
| Ex-smoker                                 | 41 |
| Non-smoker                                | 37 |
| <b>Alcohol consumption</b>                |    |
| No Alcohol                                | 43 |
| Occasional alcohol (e.g. 1-3 drinks/week) | 54 |
| 1-2 alcohol drinks per day                | 3  |
|                                           |    |

|                                                                      |    |
|----------------------------------------------------------------------|----|
| <b>Diet</b>                                                          |    |
| No specific diet                                                     | 47 |
| Diabetes Diet                                                        | 7  |
| Low Sugar                                                            | 44 |
| Low Salt                                                             | 33 |
| Low Fat                                                              | 28 |
| High Fruit and Vegetables                                            | 28 |
| Other Diet                                                           | 21 |
| <b>Exercise</b>                                                      |    |
| Very active (30 minutes of activity five or more times/week)         | 15 |
| Moderately active (30 minutes of activity less than five times/week) | 51 |
| No exercise                                                          | 34 |
| <b>Stress</b>                                                        |    |
| No stress                                                            | 15 |
| Mild stress                                                          | 27 |
| Moderate stress                                                      | 40 |
| High stress                                                          | 18 |

Table 2 Oral hypoglycemic use at baseline and the end of the study

| <b>Medication</b>        | <b>Baseline (N=100)</b> | <b>26 weeks (N=93)</b> |
|--------------------------|-------------------------|------------------------|
| <b>Metformin</b>         | 88                      | 78                     |
| <b>Sulfonylurea</b>      | 54                      | 32                     |
| <b>Meglitinides</b>      | 18                      | 29                     |
| <b>DPP4</b>              | 12                      | 3                      |
| <b>Thiazolidinedione</b> | 9                       | 0                      |

1  
2  
3  
4  
5  
6  
7  
8  
9  
10  
11  
12  
13  
14  
15  
16  
17  
18  
19  
20  
21  
22  
23  
24  
25  
26  
27  
28  
29  
30  
31  
32  
33  
34  
35  
36  
37  
38  
39  
40  
41  
42  
43  
44  
45  
46  
47  
48  
49  
50  
51  
52  
53  
54  
55  
56  
57  
58  
59  
60

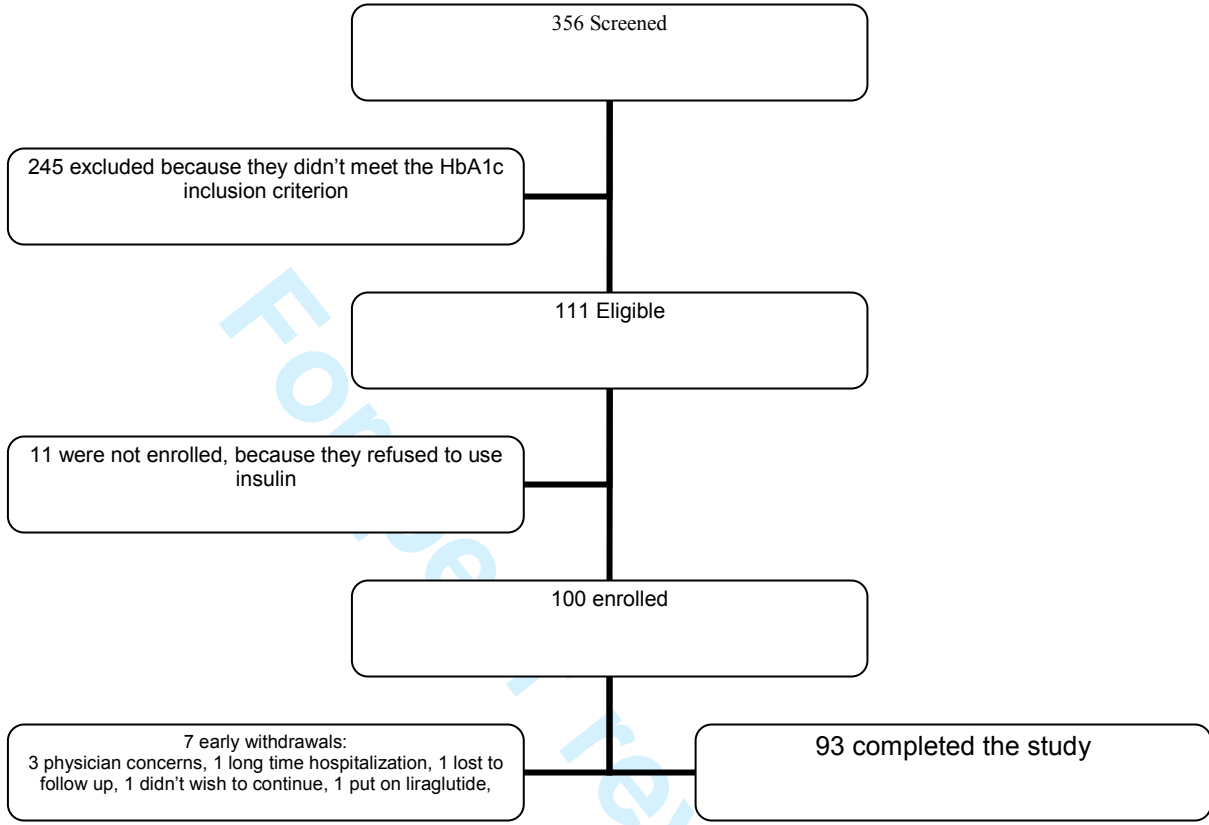

Figure 1 Patients' screening and enrollment flow chart



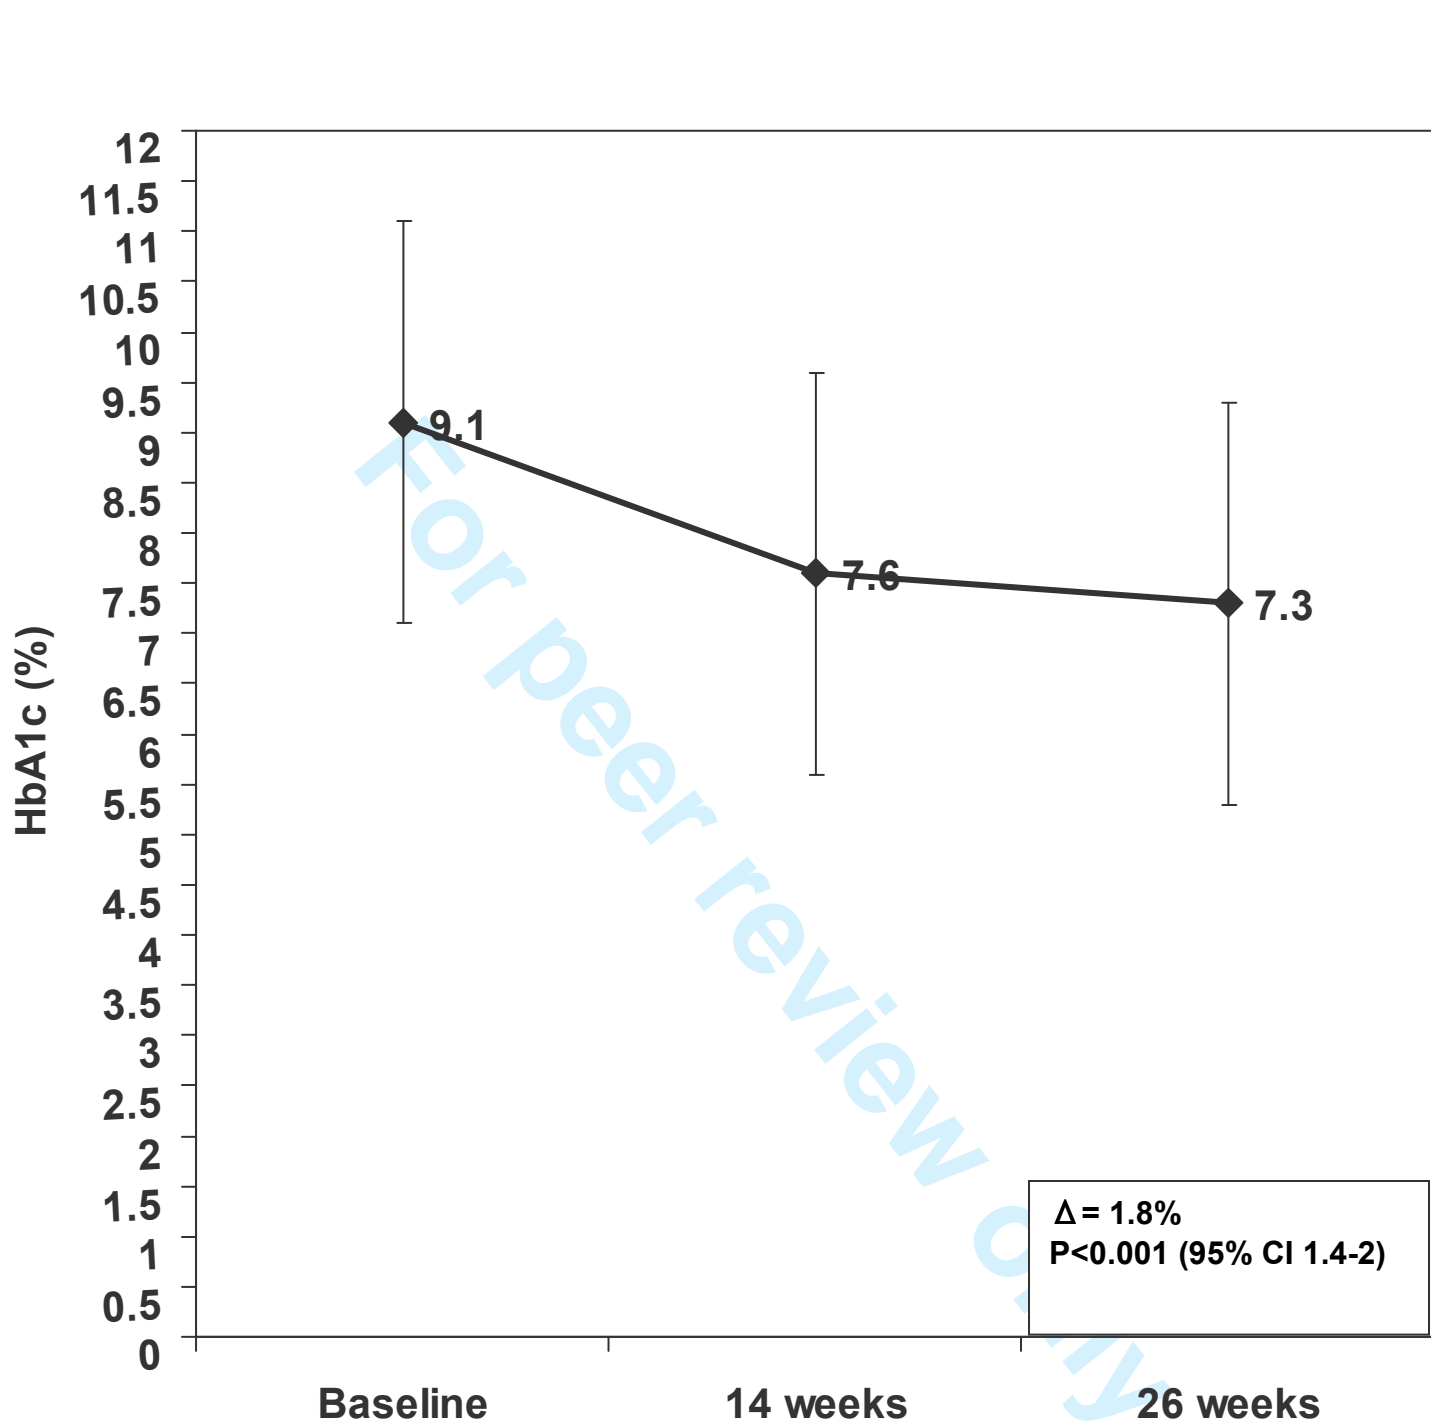

Figure 2 Intervention effect on HbA1c

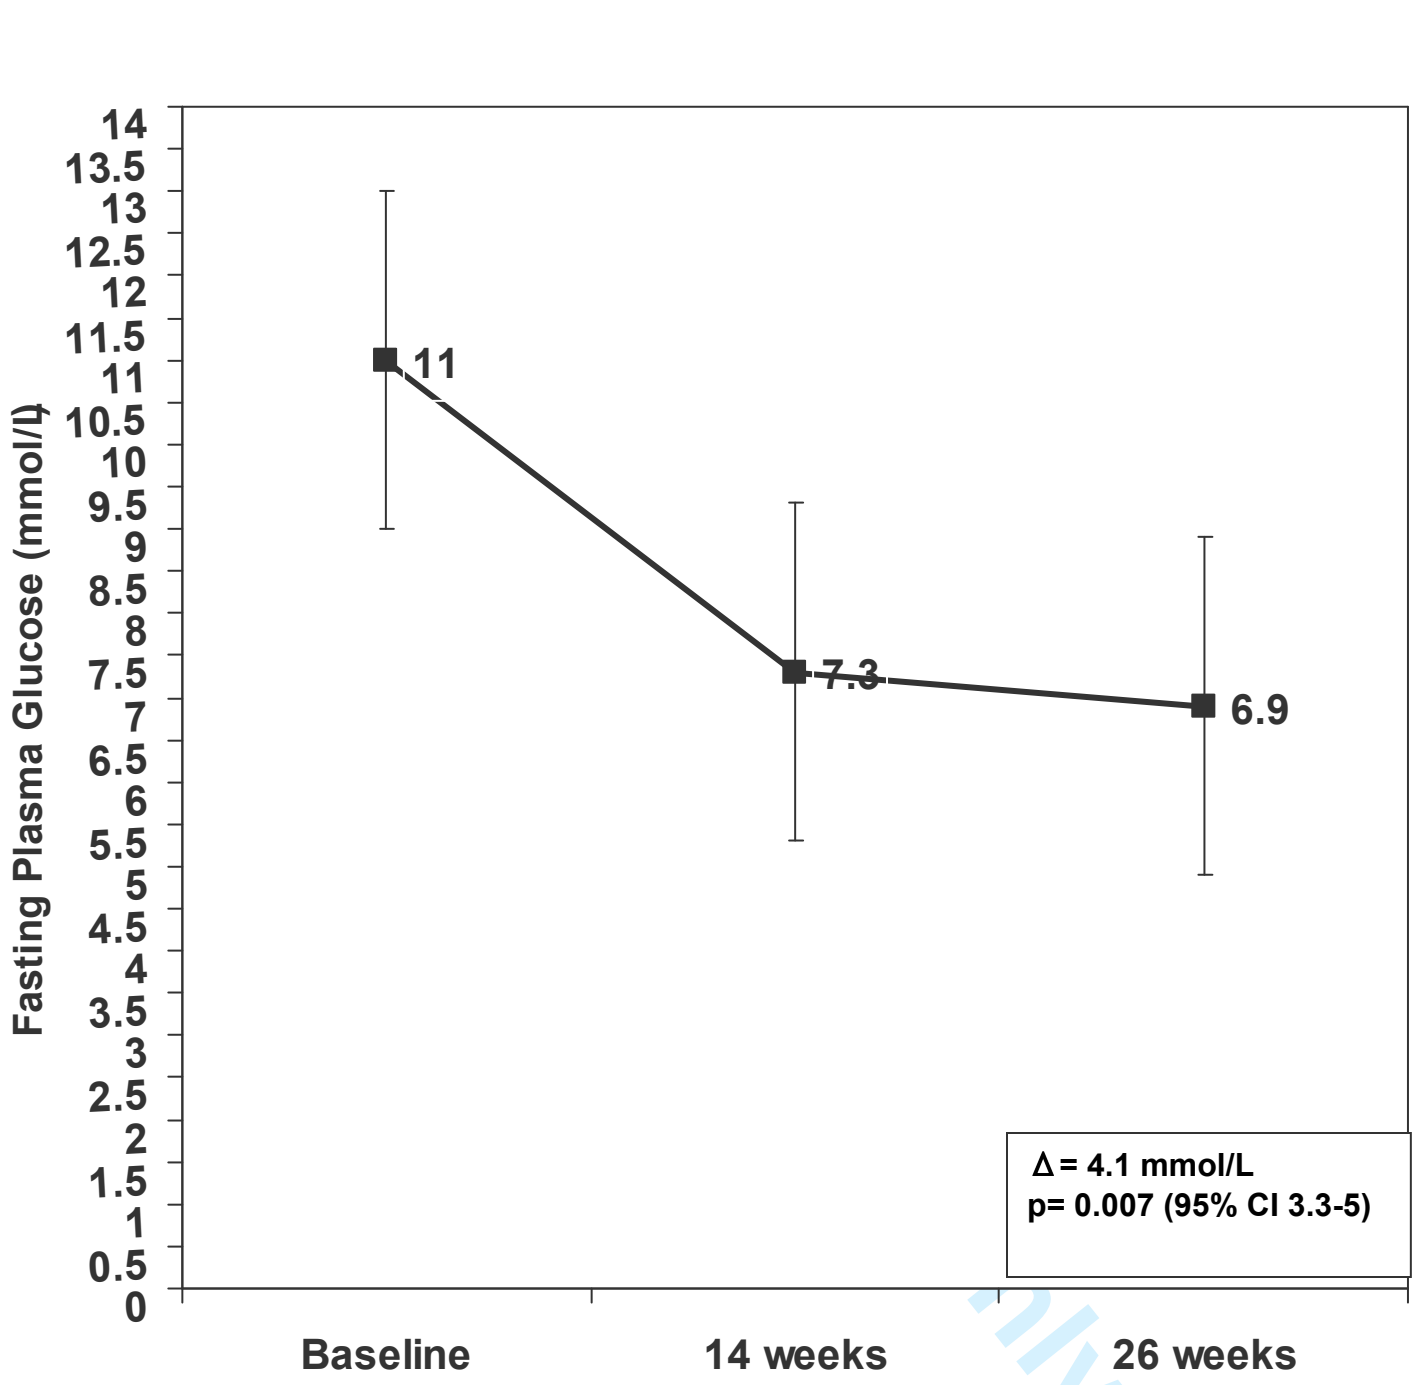

Figure 3 Intervention effect on fasting plasma glucose

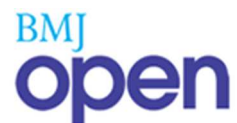

**Pharmacist Intervention for Glycemic Control in the  
Community (The RxING study)**

|                                    |                                                                                                                                                                                                                                         |
|------------------------------------|-----------------------------------------------------------------------------------------------------------------------------------------------------------------------------------------------------------------------------------------|
| Journal:                           | <i>BMJ Open</i>                                                                                                                                                                                                                         |
| Manuscript ID:                     | bmjopen-2013-003154.R1                                                                                                                                                                                                                  |
| Article Type:                      | Research                                                                                                                                                                                                                                |
| Date Submitted by the Author:      | 02-Aug-2013                                                                                                                                                                                                                             |
| Complete List of Authors:          | Al Hamarneh, Yazid; University of Alberta, Medicine<br>Charrois, Theresa; Curtin University, Pharmacy<br>Lewanczuk, Richard; University of Alberta, Medicine<br>Tsuyuki, Ross; University of Alberta, Faculty of Medicine and Dentistry |
| <b>Primary Subject<br>Heading</b>: | Diabetes and endocrinology                                                                                                                                                                                                              |
| Secondary Subject Heading:         | Diabetes and endocrinology, Public health                                                                                                                                                                                               |
| Keywords:                          | Diabetes, HbA1c, Pharmacist, insulin glargine                                                                                                                                                                                           |
|                                    |                                                                                                                                                                                                                                         |

SCHOLARONE™  
Manuscripts

1  
2  
3 **Pharmacist Intervention for Glycemic Control in the Community (The RxING study)**  
4

5 Yazid N Al Hamarneh, PhD, EPICORE Centre, Division of Cardiology, Department of  
6  
7  
8 Medicine, University of Alberta  
9

10 Theresa Charrois, MSc, School of Pharmacy, Curtin University  
11

12 Richard Lewanczuk, MD, PhD, Department of Medicine, University of Alberta  
13

14  
15 Ross T Tsuyuki, PharmD, MSc, Professor of Medicine and Director, EPICORE Centre, Division  
16  
17 of Cardiology, Department of Medicine, University of Alberta (Corresponding author)  
18

19  
20 EPICORE Centre  
21

22 220 College Plaza  
23

24 University of Alberta  
25

26  
27 Edmonton, Alberta  
28

29 T6G 2C8  
30

31 Tel: 780-492-8526  
32

33 Fax: 780-492-6059  
34

35  
36 [ross.tsuyuki@ualberta.ca](mailto:ross.tsuyuki@ualberta.ca)  
37  
38  
39  
40

41 Word count: 2305  
42

43 References: 22  
44

45 Tables: 3  
46  
47

48 Figures: 3  
49  
50  
51  
52  
53  
54  
55  
56  
57  
58  
59  
60

## Abstract

Objective: To determine the effect of a community pharmacist prescribing intervention on glycemic control in patients with poorly controlled type 2 diabetes.

Design: Pragmatic, before-after design

Setting: 12 community pharmacies in Alberta, Canada.

Participants: Type 2 diabetes receiving oral hypoglycemic medications and with HbA1c of 7.5-11%

Intervention: Pharmacists systematically identified potential candidates by inviting patients with Type 2 diabetes to test their HbA1c using validated point of care technology (DCA Vantage®). Pharmacists prescribed 10 units of insulin glargine at bedtime, adjusted by increments of 1 unit daily to achieve a morning fasting glucose of  $\leq 5.5$  mmol/L. The patients were followed at 2, 4, 8, 14, 20, and 26 weeks.

Primary outcome: Change in HbA1c from baseline to week 26.

Secondary outcomes: Proportion of patients achieving target HbA1c, changes in oral hypoglycemic agents, persistence on insulin glargine, number of insulin dosage adjustments per patient and number of hypoglycemic episodes.

Results: We screened 365 patients of whom 111 were eligible. Of those, 100 (90%) were enrolled in the study; all 11 patients who did not consent refused to use insulin.

Average age was 64 years (standard deviation (SD) 10.4), while average diabetes duration was 10.2 years (SD 7). HbA1c was reduced from 9.1% (SD 1) at baseline to 7.3% (SD 0.9) a change of 1.8% (95% CI 1.4-2,  $p < 0.001$ ). Fasting plasma glucose was reduced from 11 mmol/l (SD 3.3) to 6.9 mmol/l (SD 1.8), a change of 4.1 mmol/l (95% CI of 3.3-5,  $p = 0.007$ ). Fifty one percent of the patients achieved the target HbA1c of  $\leq 7\%$  at the end of the study.

1  
2  
3  
4  
5  
6  
7  
8  
9  
10  
11  
12  
13  
14  
15  
16  
17  
18  
19  
20  
21  
22  
23  
24  
25  
26  
27  
28  
29  
30  
31  
32  
33  
34  
35  
36  
37  
38  
39  
40  
41  
42  
43  
44  
45  
46  
47  
48  
49  
50  
51  
52  
53  
54  
55  
56  
57  
58  
59  
60

Conclusion: This is the first completed study of independent prescribing by pharmacists. Our results showed similar improvements in glycaemic control as previous physician-led studies.

RxING provides further evidence for the benefit of pharmacist care in diabetes.

Trial registration: [clinicaltrials.gov](http://clinicaltrials.gov); Identifier: NCT01335763

For peer review only

## Article summary

### Article focus:

To determine the effect of a community pharmacist prescribing intervention on glycaemic control in patients with poorly controlled type 2 diabetes.

### Key Messages:

- Community pharmacist prescribing intervention on glycaemic control in patients with poorly controlled type 2 diabetes reduced patients' HbA1c from 9.1% at baseline to 7.3% at 26 weeks, a change of 1.8%. While fasting plasma glucose (FPG) was reduced from 11 mmol/L at baseline to 6.9 mmol/L at 26 weeks, a change of 4.1 mmol/L
- Pharmacists can systematically identify patients with poor glycaemic control, educate and support them to achieve better outcomes
- Since pharmacists see patients with diabetes frequently, we recommend getting the pharmacists more involved in delivering the care for patients with type 2 diabetes

### Strengths and limitations of the study:

- This is the first study of independent prescribing by pharmacists in patients with diabetes and it demonstrates a clinically important improvement in glycaemic control.
- The 26 week follow up period can be considered relatively short; it is possible that with a longer study more patients may have achieved the target HbA1c (or fewer if patients discontinued their insulin).
- We did observe a number of "hypoglycaemic-type symptoms", however we were not able to confirm these as true hypoglycemia. We also have no frame of reference as patients may have experienced some of these symptoms prior to enrolling in our study. Finally,

1  
2  
3 the number of reported “hypoglycemic-type symptoms” in this study was consistent with  
4  
5 the findings reported in the literature.  
6  
7  
8  
9

10 **Financial acknowledgements:** This work was supported by unrestricted investigator-initiated  
11 funding provided by Sanofi Canada and the testing equipments were provided by ManthaMed.  
12  
13

14  
15  
16 **Role of the Sponsors:** The funders had no role in the design and conduct of the study; in the  
17 collection, analysis, and interpretation of the data; or in the preparation, review, or approval of  
18 the manuscript.  
19  
20  
21  
22  
23  
24  
25  
26  
27  
28  
29  
30  
31  
32  
33  
34  
35  
36  
37  
38  
39  
40  
41  
42  
43  
44  
45  
46  
47  
48  
49  
50  
51  
52  
53  
54  
55  
56  
57  
58  
59  
60

Peer review only



## Introduction

Currently, 347 million individuals are living with diabetes worldwide (1). Approximately 90% of those individuals have type 2 diabetes (1). The number of new cases of type 2 diabetes is rapidly increasing mainly because of obesity and an ageing population (2).

Because of its chronic nature and the severe complications associated with it, diabetes carries a health and a financial burden on the affected individual and health systems (3). Poorly controlled diabetes puts patients at high risk of suffering from macrovascular and microvascular complications (4).

Type 2 diabetes is a progressive disease; it has been reported that 50% of the insulin producing capacity is lost at the time of diagnosis with an average loss rate of 5% per year afterwards (5).

As a result, many patients with type 2 diabetes will eventually require the use of insulin; however, clinicians seem reluctant to start insulin (6) despite the evidence from studies such as INSIGHT, which demonstrated improved glycemic control with the addition of insulin glargine to oral hypoglycemic agents in patients with type 2 diabetes (7) as well as guidelines that recommending starting insulin immediately if the patients HbA1c is  $\geq 9\%$  (8).

Clinicians' reluctance to initiating insulin due to unfamiliarity with the treatment or using it as a last resort (9) plays a major role in influencing the patient's decision to commence insulin treatment regimen. It has been reported that many patients have 'psychological insulin resistance' where they are unwilling to take insulin because of certain beliefs that insulin will not

1  
2  
3 be beneficial and in some cases it may even be harmful. Personal experience and messages from  
4  
5 different healthcare professionals can also affect the patient's decisions regarding insulin  
6  
7 treatment regimen (6, 10).  
8  
9

10  
11  
12 Pharmacists are front line healthcare professionals who see patients with diabetes more  
13  
14 frequently than physicians (15 times/year Vs 7 times/year) (11) and as such, could proactively  
15  
16 and systematically identify patients with poorly controlled type 2 diabetes in a broad-based  
17  
18 public health approach to chronic disease management (12). Indeed, there is good evidence for  
19  
20 the efficacy of pharmacist care in diabetes (13). In community settings, pharmacists have  
21  
22 demonstrated that they are capable of identifying poorly controlled patients, educate patients  
23  
24 regarding diabetes, medications and self-monitoring of plasma glucose, provide adherence  
25  
26 support, identify and resolve diabetes problems and complications and setting goals in order  
27  
28 reduce the patients' HbA1c, plasma glucose and improve their quality of life and other co-  
29  
30 morbidities (4, 12 - 16). Moreover, the scope of practice for pharmacists in Alberta is changing,  
31  
32 allowing pharmacists to prescribe medications and order laboratory tests. As such, there is an  
33  
34 unprecedented opportunity to identify and improve glycemic control in patients with type 2  
35  
36 diabetes.  
37  
38  
39  
40  
41  
42  
43  
44  
45

46 The main aim of the RxING study was to determine the effect of a community pharmacist  
47  
48 prescribing intervention on glycemic control in patients with poorly controlled type 2 diabetes.  
49  
50  
51  
52  
53  
54  
55  
56  
57  
58  
59  
60

## Methods

### *Study design and setting*

RxING was a multicentre pragmatic before-after design trial, which was conducted in 12 community pharmacies in the province of Alberta, Canada.

We chose the before-after design because we had concerns about withholding insulin from this high risk group. Those concerns were based on guidelines recommendations (8) and the evidence from studies such as INSIGHT (7).

All participating pharmacists, who were either certified diabetes educators (CDE) or preparing to be CDE, received face to face training by the study team. The training material was based on the most recent Canadian guidelines and recommendations (7,8). They also received a manual of operations to help them conduct the study.

### *Study participants*

We recruited adults who had physician diagnosed type 2 diabetes for at least six months and were receiving one or more oral hypoglycemic agents, had a HbA1c between 7.5% and 11%, and who were willing to sign an informed consent.

We excluded patients who were unwilling to use insulin, previously or currently using insulin (confirmed by the patient's medication records), had a history of ketoacidosis (confirmed by the patient's healthcare records), were pregnant, worked night shifts, had renal impairment (serum creatinine of  $\geq 124$  mmol/l for females or  $\geq 133$  mmol/l for males) (confirmed by the patient's

1  
2  
3 healthcare records), were clinically unstable (based on the pharmacist's judgment), were  
4  
5 unwilling or unable to attend follow-up visits, or felt to be unlikely to adhere to study procedures  
6  
7 due to cognitive limitations (based on the pharmacist's judgment), severe psychiatric disorders or  
8  
9 alcoholism (confirmed by the patient's healthcare records).  
10  
11  
12  
13

### 14 15 *Recruitment*

16  
17 Pharmacists systematically identified potential candidates from within their practice by inviting  
18  
19 patients with type 2 diabetes (e.g., patients on metformin) to test their HbA1c in the pharmacy  
20  
21 using validated point of care technology (DCA Vantage®, Siemens, Tarrytown, New York,  
22  
23 USA). If the result of the HbA1c test was high (7.5-11 %) and the patient met the other inclusion  
24  
25 criteria for the study the patient was asked if he/she wanted to participate in the study. After  
26  
27 providing written informed consent, the patient was enrolled in the study. If HbA1c was > 11%  
28  
29 the patient was assessed by the study investigators, and the patient was referred to his/her  
30  
31 physician.  
32  
33  
34  
35  
36  
37  
38

### 39 *Intervention*

40  
41 The patient was prescribed 10 units insulin glargine at bedtime, and was asked to titrate the dose  
42  
43 by 1 unit/day to achieve a fasting plasma glucose of  $\leq 5.5$  mmol/L (7, 17). The intervention also  
44  
45 included patient education regarding insulin use, dose titration and self monitoring. Patients  
46  
47 contacted the pharmacist when they reached a fasting plasma glucose of 6 mmol/L. All patients  
48  
49 remained on their previously prescribed oral hypoglycemic agent(s). If the combination with  
50  
51 insulin was not approved in Canada, the oral hypoglycemic agent was discontinued (e.g.,  
52  
53 thiazolidinedione). Adjustments were made at the discretion of the treating pharmacist based on  
54  
55  
56  
57  
58  
59  
60

1  
2  
3 the most recent Canadian guidelines (8). The patient's family physician received a letter from the  
4 pharmacist to inform him/her that the patient was participating in the study.  
5  
6  
7  
8  
9

### 10 *Follow-up*

11  
12 Patients were followed at 2, 4, 8, 14, 20, and 26 weeks to provide ongoing care, check adherence  
13 to the insulin regimen, fasting blood sugars (measured by the patient), insulin dose and titration  
14 and adverse events. HbA1c was measured at weeks 14 and 26 using the same technique used at  
15 baseline. Family physicians were kept informed of patient's progress and any medication change  
16 after each visit.  
17  
18  
19  
20  
21  
22  
23  
24  
25  
26

### 27 *Outcomes*

28  
29 The primary outcome measure was the change in HbA1c from baseline to week 26. Secondary  
30 outcomes included: Proportion of patients achieving target HbA1c (defined as  $HbA1c \leq 7.0\%$ ),  
31 changes in oral hypoglycemic agents, persistence on insulin glargine (% still taking insulin at the  
32 end of follow-up), number of insulin dosage adjustments per patient, number of hypoglycemic  
33 episodes.  
34  
35  
36  
37  
38  
39  
40  
41  
42  
43

### 44 *Sample size calculation*

45  
46 With a sample size of 80 patients and the following assumptions: a standard deviation of 1.1 and  
47 a 2 sided alpha of 0.05 (7) we calculated 90% power to detect a mean decrease in HbA1c of  
48 0.4%. Since this a pragmatic, practice-based trial, the sample size was inflated to 100 to account  
49 for possible losses to follow-up.  
50  
51  
52  
53  
54  
55  
56  
57  
58  
59  
60

1  
2  
3  
4  
5  
6 *Data analysis*  
7

8 The level of significance was set at 0.05. All analyses were done on intention to treat basis.  
9

10 Missing data were imputed using a last value carried forward strategy. The mean HbA1c  
11 between baseline and 26 weeks was compared using a paired t-test. Secondary outcomes were  
12 analyzed using paired t-tests and basic frequencies. Linear regression was used to adjust for the  
13 patients' demographics and clinical characteristics.  
14  
15  
16  
17  
18  
19

20  
21  
22 RxING was approved by the Health Research Ethics Board of the University of Alberta and was  
23 registered on clinicaltrials.gov (NCT01335763).  
24  
25  
26  
27  
28  
29  
30  
31  
32  
33  
34  
35  
36  
37  
38  
39  
40  
41  
42  
43  
44  
45  
46  
47  
48  
49  
50  
51  
52  
53  
54  
55  
56  
57  
58  
59  
60

## Results

We screened 356 patients with type 2 diabetes; 245 were excluded because they did not meet the HbA1c inclusion criteria. Out of the 111 eligible patients, 11 were not enrolled because they refused to use insulin, leaving 100 patients enrolled (Figure 1)

The demographic and clinical characteristics of the patients are reported in Table 1. The mean age was 64 years (Standard Deviation (SD) 10.4) and had a diabetes duration of 10.2 years (SD 7). Fifty-eight percent of the patients were male, 77% were married and 90% reported having at least high school education. Nearly half of the patients (48%) were retired, almost ninety percent (89%) were white (ethnicity was self reported) and nearly half (47%) have a government medication coverage. Around one quarter of the patients (22%) reported that they were smokers, and more than half (54%) reported occasional consumption of alcohol (e.g. 1-3 drinks/week). Nearly two thirds of the patients had elevated blood pressure (63%) and elevated cholesterol (64%) (hypertension and high cholesterol were self reported).

All but 1 patient was taking insulin glargine at the end of the study (he stopped his insulin before the final visit because his plasma glucose readings were “good”). At the end of the study the mean insulin glargine dose was 31.1 units (SD 18.4) with a mean of 21.1 dose adjustments (SD 18.8) per patient.

HbA1c was reduced from 9.1% (SD 1) at baseline to 7.3% (SD 0.9) at 26 weeks, a change of 1.8% (95% CI 1.4-2,  $p < 0.001$ ) (Figure 2). While fasting plasma glucose (FPG) was reduced from

1  
2  
3 11 mmol/L (SD 3.3) at baseline to 6.9 mmol/L (SD 1.8) at 26 weeks, a change of 4.1 mmol/L  
4  
5 (95% CI of 3.3-5, p= 0.007) (Figure 3).  
6  
7  
8  
9

10 Fifty one percent of the patients achieved the target HbA1c of  $\leq 7\%$  at the end of the study. At  
11  
12 baseline, two thirds (66%) of the patients were taking two or more medications (Table 2), the  
13  
14 most widely used combination was metformin and gliclazide, followed metformin and glyburide  
15  
16 and metformin and repaglinide. Nearly half of the patients (48%) had their oral hypoglycemic  
17  
18 regimen altered (Table 3); the most frequent alterations were stopping sulfonylurea (46%)  
19  
20 followed by initiating meglitinides (23%), stopping metformin (21%) and stopping  
21  
22 thiazolidinedoine and DPP4 inhibitors (19%). Those alterations were made by the pharmacists  
23  
24 who then informed the patients' family physicians.  
25  
26  
27  
28  
29  
30  
31

32 There was an apparent slight increase in the body mass index (BMI) and waist circumference  
33  
34 between baseline and the end of the study but this increase was not statistically significant (31.6  
35  
36 (SD 6.3) to 32.6 (SD 6.3), p=0.29 and 106 (SD 13.8) to 107.4 (SD 12.9), p=0.5 respectively).  
37  
38  
39  
40

41 Hypoglycemic-type symptoms were reported by 54 patients. Only 2 of these episodes required  
42  
43 medical attention (one caused a visit to the family physician while the other required a visit to  
44  
45 the emergency department without an overnight stay). We were not able to confirm that these  
46  
47 episodes were true hypoglycemia, via blood glucose measurements, nor did we have baseline  
48  
49 information on such symptoms .  
50  
51  
52  
53  
54  
55  
56  
57  
58  
59  
60



## Discussion

We found that a community pharmacist prescribing intervention in patients with poorly controlled type 2 diabetes improved patients' HbA1c by an absolute value of 1.8% (95% CI 1.4-2,  $p < 0.001$ ) and fasting plasma glucose by 4.1 mmol/L (95% CI of 3.3-5,  $p = 0.007$ ). This is the first study of independent prescribing by pharmacists in patients with diabetes and represents a clinically important improvement in glycaemic control.

Our findings are consistent with the findings of Gerstein and colleagues (2006) and Harris and colleagues (2008) who compared the effect of adding insulin glargine to the oral hypoglycaemic regimen versus the conventional therapy where oral hypoglycaemic agent doses were adjusted. They reported better glycaemic control in the insulin glargine group after 26 weeks of follow up (7, 9). Our findings are also consistent with the findings of Wubben and Vivian (2008) who conducted a systematic review to assess the effectiveness of pharmacist intervention in patients with diabetes in outpatient settings. They reported additional HbA1c reduction (when compared to usual care) of 0.5% when pharmacists did not have prescribing authority and 1% when pharmacists had prescribing authority (collaborative prescribing in this case) (13).

It has been reported in the literature that the adherence rates to the insulin regimen are unsatisfactory (19); however in our study, 99% of the patients were adherent to their treatment regimen for 6 months, this can be explained by the intensive intervention provided by the pharmacist and the relatively short duration of the study.

1  
2  
3 The slight increase in BMI and waist circumference in our study is consistent with the findings  
4  
5 of Heine and colleagues (2005) and Russell-Jones and colleagues (2009) who compared the  
6  
7 efficacy of insulin glargine to an active diabetes treatment and reported that there was a slight  
8  
9 increase in BMI and waist circumference in patients who used insulin glargine after 26 weeks  
10  
11 (20, 21).  
12  
13

14  
15  
16  
17 This study is not without limitations. The 26 week follow up period can be considered relatively  
18  
19 short; it is possible that with a longer study more patients may have achieved the target HbA1c  
20  
21 (or fewer if patients discontinued their insulin). Patients who were unwilling to use insulin were  
22  
23 excluded from the study; however patients' willingness to use insulin was high in our pilot study  
24  
25 (4) and also during the screening process. The proactive and systematic approach that we used in  
26  
27 this study also helped in identifying patients who could benefit from insulin. We acknowledge  
28  
29 that adding insulin to the oral hypoglycemic agent(s) regimen is one of the options which are  
30  
31 available to improve glycemic control; however this choice was based on the insulin's efficacy  
32  
33 and safety profile. We did observe a number of "hypoglycemic-type symptoms", however we  
34  
35 were not able to confirm these as true hypoglycemia. We also have no frame of reference as  
36  
37 patients may have experienced some of these symptoms prior to enrolling in our study. Finally,  
38  
39 the number of reported "hypoglycemic-type symptoms" in this study was consistent with the  
40  
41 findings of a meta analysis of more than 1100 diabetes patients who were using insulin glargine  
42  
43 (22).  
44  
45  
46  
47  
48  
49

50  
51  
52  
53 Our findings take the evidence for the benefits of pharmacist care in diabetes one step further.  
54  
55 That prescribing insulin improves glycemic control in itself is perhaps not surprising; what is  
56  
57  
58  
59  
60

1  
2  
3 important is that pharmacists can systematically identify patients with poor glycemic control,  
4 educate and support patients to achieve better outcomes. Since pharmacists see patients with  
5 diabetes frequently (11), this can be an attractive approach.  
6  
7  
8  
9  
10

11  
12  
13  
14  
15  
16  
17 **Acknowledgements:** The authors would like to acknowledge the participation of the following  
18 pharmacists and pharmacies in making this study possible: Rick Siemens ( London Drugs,  
19 Lethbridge), Darsey Milford ( Turtle Mountain Pharmacy, Bellevue), Rita Bowron, Rami  
20 Chowaniec, Nader Hammoud, Carol Wei, Sheilah Kostecki ( Safeway Pharmacy, Edmonton and  
21 Calgary), Anita Brown (Shoppers Drug Mart, Okotoks), Janelle Fox, Tony Nickonchuck  
22 (Walmart Pharmacy Cold Lake and Peace River), Rita Lyster (Rita's Apothecary and Home  
23 Healthcare, Barrhead) and Anita and Warren Dobson (Medicine Shoppe, Calgary).  
24  
25  
26  
27  
28  
29  
30  
31  
32  
33

34 **Funding:** This work was supported by unrestricted investigator-initiated funding provided by  
35 Sanofi Canada and the testing equipments were provided by ManthaMed.  
36  
37  
38

39 **Role of the Sponsors:** The funders had no role in the design and conduct of the study; in the  
40 collection, analysis, and interpretation of the data; or in the preparation, review, or approval of  
41 the final manuscript.  
42  
43  
44

45 **Contributors:** All the authors have made substantial contributions to the manuscript. These  
46 contributions are as the following: Al Hamarneh had full access to all of the data in the study and  
47 takes responsibility for the integrity of the data and the accuracy of the data analysis. *Study*  
48 *concept and design:* Tsuyuki and Charrois. *Acquisition of data:* Tsuyuki and Al  
49 Hamarneh. *Analysis and interpretation of data:* Tsuyuki and Al Hamarneh. *Drafting of the*  
50  
51  
52  
53  
54  
55  
56  
57  
58  
59  
60

1  
2  
3 *manuscript*: Tsuyuki and Al Hamarneh. *Critical revision of the manuscript for important*  
4  
5 *intellectual content*: Tsuyuki, Lewanczuk, Charrois and Al Hamarneh. *Statistical analysis*:  
6  
7  
8 Tsuyuki and Al Hamarneh. *Administrative, technical, and material support*: Tsuyuki,  
9  
10 Lewanczuk, Charrois and Al Hamarneh. *Study supervision*: Tsuyuki and Lewanczuk.  
11

12 **Competing interests:** None declared  
13

14 **Ethics approval:** Health Research Ethics Board of the University of Alberta  
15

16 **Data sharing statement:** All obtained data have been analysed and reported in the manuscript.  
17

18 Any further queries can be resolved by contacting the authors  
19  
20  
21  
22  
23  
24  
25  
26  
27  
28  
29  
30  
31  
32  
33  
34  
35  
36  
37  
38  
39  
40  
41  
42  
43  
44  
45  
46  
47  
48  
49  
50  
51  
52  
53  
54  
55  
56  
57  
58  
59  
60

**References:**

1. World Health Organization. Diabetes. 2012. Available on:  
<http://www.who.int/mediacentre/factsheets/fs312/en/> (accessed February 2013).
2. Lipscombe LL, Hux JE. Trends in diabetes prevalence, incidence and mortality in Ontario, Canada 1995-2005: a population based study. *Lancet*. 2007; 369:750-756.
3. World Health Organization. Diabetes: the cost of diabetes. 2012. Available on:  
<http://www.who.int/mediacentre/factsheets/fs236/en/> (accessed February, 2013)
4. Al Hamarneh YN, Rosenthal M, Tsuyuki RT. Glycemic control in community-dwelling patients with type 2 diabetes. *Can Pharm J*. 2012; 2: 68-69e1.
5. Lebovitz HE. Insulin secretagogues: old and new. *Diabetes Rev*. 1999; 7:139-153.
6. Polonsky WH, Jackson RA. What's so tough about taking insulin? *Clin Diabetes*. 2004; 22:147-50.
7. Gerstein HC, Yale JF, Harris SB, et al. A randomized trial of adding insulin glargine vs. avoidance of insulin in people with Type 2 diabetes on either no oral glucose-lowering agents or submaximal doses of metformin and/or sulphonylureas. The Canadian INSIGHT study. *Diabet Med*. 2006;23:736-42.

- 1  
2  
3  
4  
5  
6 8. Canadian Diabetes Association. Canadian Diabetes Association 2008 Clinical Practice  
7  
8 Guidelines for the Prevention and Management of Diabetes in Canada. *Can J Diabetes.*  
9  
10 2008;32:s1-s201.  
11
- 12  
13 9. Harris S, Yale JF, Dempsey E, Gerstein H. Can family physicians help patients initiate  
14  
15 basal insulin therapy successfully? Randomized trial of patient-titrated insulin glargine  
16  
17 compared with standard oral therapy: Lessons for family practice from Canadian INSIGHT  
18  
19 trial. *Can Fam Physicians.* 2008; 54: 550-558.  
20  
21
- 22  
23  
24 10. Polonsky WH, Fisher L, Guzman S et al. Psychological insulin resistance in patients with  
25  
26 type 2 diabetes. *Diabetes Care.* 2005; 28: 2543-2545  
27  
28
- 29  
30  
31 11. Shiu JR, Simpson SH, Johnson JA, Tsuyuki RT. Quantifying opportunities to affect  
32  
33 diabetes management in the community. *Can Pharm J.* 2006; 139(3): 37-38.  
34  
35
- 36  
37  
38 12. O'Donovan Dog, Byrne S, Sahm L. The role of pharmacists in control and management of  
39  
40 type 2 diabetes mellitus; a review of the literature. *J Diabetology.* 2011; 1: 5-21.  
41  
42  
43
- 44  
45  
46 13. Wubben DP, Vivian EM. Effects of pharmacist outpatient interventions on adults with  
47  
48 diabetes mellitus: a systematic review. *Pharmacotherapy.* 2008; 28: 421-436.  
49  
50
- 51  
52  
53 14. Armour CL, Taylor SJ, Houriham F et al. Implementation and evaluation of Australian  
54  
55 pharmacists' diabetes care services. *J Am Pharm Assoc.* 2004; 44: 455-466.  
56  
57  
58  
59  
60

- 1  
2  
3  
4  
5  
6 15. Fornos JA, Andres NF, Andres JC et al. A pharmacotherapy follow-up program in patients  
7  
8 with type-2 diabetes in community pharmacies in Spain. *Pharm World Sci.* 2006; 28: 65-  
9  
10 72.
- 11  
12  
13  
14  
15 16. Krass I, Armour CL, Mitchell B, et al. The pharmacy diabetes care program: assessment of  
16  
17 a community pharmacy diabetes service model in Australia. *Diabet Med.* 2007; 24: 677-  
18  
19 683.
- 20  
21  
22  
23  
24 17. Strange P. Treat-to-target insulin titration algorithms when initiating long or intermediate  
25  
26 acting insulin in type 2 diabetes. *J Diabetes Sci Technol.* 2007; 1: 540 -548.
- 27  
28  
29  
30  
31  
32  
33 18. Raskin P, Gylvin T, Weng W, Chaykin I. Comparison of insulin detemir and insulin  
34  
35 glargine using a basal-bolus regimen in a randomized, controlled clinical study in patients  
36  
37 with type 2 diabetes. *Diabetes Metab Res Rev.* 2009; 25: 542-548.
- 38  
39  
40  
41  
42  
43 19. Hartman I. Insulin Analogs: Impact on Treatment Success, Satisfaction, Quality of Life,  
44  
45 and Adherence. *Clin Med Res.* 2008; 6: 54-67.
- 46  
47  
48  
49  
50 20. Heine RJ, Van Gaal LF, Johns D, et al. Exenatide versus Insulin Glargine in Patients with  
51  
52 Suboptimally Controlled Type 2 Diabetes. A Randomized trial. *Ann Intern Med.* 2005;  
53  
54 143: 559-569.
- 55  
56  
57  
58  
59  
60

- 1  
2  
3 21. Russell-Jones D, Vaag A, Schmitz O, et al. Liraglutide vs insulin glargine and placebo in  
4 combination with metformin and sulfonylurea therapy in type 2 diabetes mellitus (LEAD-5  
5 met+SU): a randomised controlled trial. *Diabetologia*. 2009; 52: 2046-2055.  
6  
7  
8  
9  
10  
11  
12 22. Rosenstock J, Dailey G, Massi-Benedetti M, et al. Reduced hypoglycemia risk with insulin  
13 glargine in type 2 diabetes. *Diabetes Care*. 2005; 28:950-955.  
14  
15  
16  
17  
18  
19  
20  
21  
22  
23  
24  
25  
26  
27  
28  
29  
30  
31  
32  
33  
34  
35  
36  
37  
38  
39  
40  
41  
42  
43  
44  
45  
46  
47  
48  
49  
50  
51  
52  
53  
54  
55  
56  
57  
58  
59  
60



Table 1 Demographic and clinical characteristics of the patients (N=100)

| <b>Characteristic</b>         | <b>Frequency</b> |
|-------------------------------|------------------|
| <b>Gender</b>                 |                  |
| Male                          | 58               |
| Female                        | 42               |
| <b>Marital status</b>         |                  |
| Single                        | 8                |
| Married                       | 77               |
| Divorced                      | 9                |
| Widowed                       | 6                |
| <b>Education</b>              |                  |
| Grade School                  | 10               |
| High School                   | 36               |
| Some post secondary education | 26               |
| Post secondary education      | 28               |
| <b>Employment</b>             |                  |
| Caring for family             | 1                |
| Working for profit/pay        | 36               |
| Unemployed/looking for a job  | 6                |
| Retired                       | 48               |
| Other                         | 9                |
|                               |                  |

|                                           |    |
|-------------------------------------------|----|
| <b>Self reported Ethnicity</b>            |    |
| Aboriginal/first nation                   | 1  |
| White                                     | 89 |
| South Asian                               | 1  |
| Oriental                                  | 4  |
| Other                                     | 4  |
| Declined                                  | 1  |
| <b>Medication coverage</b>                |    |
| Private                                   | 29 |
| Government                                | 47 |
| Out of pocket                             | 15 |
| Private and government                    | 7  |
| Private and out of pocket                 | 2  |
| <b>Smoking status</b>                     |    |
| Smoker                                    | 22 |
| Ex-smoker                                 | 41 |
| Non-smoker                                | 37 |
| <b>Alcohol consumption</b>                |    |
| No Alcohol                                | 43 |
| Occasional alcohol (e.g. 1-3 drinks/week) | 54 |
| 1-2 alcohol drinks per day                | 3  |
|                                           |    |

|                                       |    |
|---------------------------------------|----|
| <b>Self reported Hypertension</b>     |    |
| Yes                                   | 63 |
| No                                    | 36 |
| Unknown                               | 1  |
| <b>Self reported high cholesterol</b> |    |
| Yes                                   | 64 |
| No                                    | 33 |
| Unknown                               | 3  |

Table 2 Number of oral hypoglycemic agents used by patients and Mean HbA1c

| Number of oral agents | Frequency | Mean HbA1c (SD) |
|-----------------------|-----------|-----------------|
| 1                     | 34        | 8.7 (0.9)       |
| 2                     | 56        | 9.1 (0.9)       |
| 3                     | 7         | 9.8 (1.6)       |
| 4                     | 3         | 8.7 (0.7)       |

For peer review only

Table 3 Oral hypoglycemic use at baseline and the end of the study

| <b>Medication</b>        | <b>Baseline (N=100)</b> | <b>26 weeks (N=93)</b> |
|--------------------------|-------------------------|------------------------|
| <b>Metformin</b>         | 88                      | 78                     |
| <b>Sulfonylurea</b>      | 54                      | 32                     |
| <b>Meglitinides</b>      | 18                      | 29                     |
| <b>DPP4</b>              | 12                      | 3                      |
| <b>Thiazolidinedione</b> | 9                       | 0                      |

1  
2  
3  
4  
5  
6  
7  
8  
9  
10  
11  
12  
13  
14  
15  
16  
17  
18  
19  
20  
21  
22  
23  
24  
25  
26  
27  
28  
29  
30  
31  
32  
33  
34  
35  
36  
37  
38  
39  
40  
41  
42  
43  
44  
45  
46  
47  
48  
49  
50  
51  
52  
53  
54  
55  
56  
57  
58  
59  
60

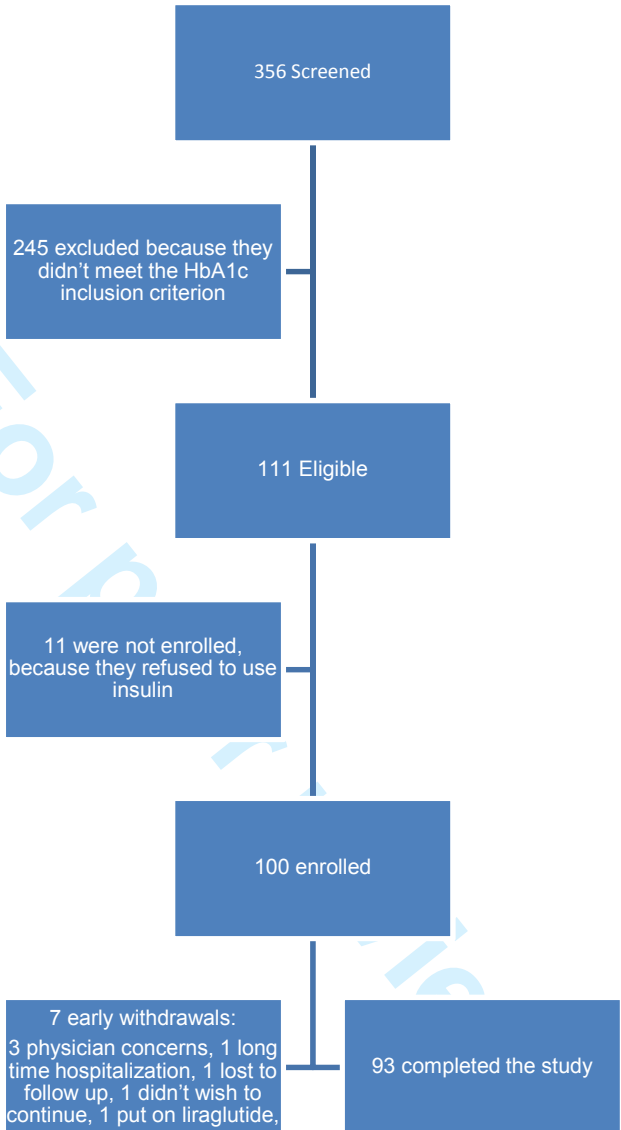

Figure 1 Patients' screening and enrollment flow chart

1  
2  
3  
4  
5  
6  
7  
8  
9  
10  
11  
12  
13  
14  
15  
16  
17  
18  
19  
20  
21  
22  
23  
24  
25  
26  
27  
28  
29  
30  
31  
32  
33  
34  
35  
36  
37  
38  
39  
40  
41  
42  
43  
44  
45  
46  
47  
48  
49  
50  
51  
52  
53  
54  
55  
56  
57  
58  
59  
60

For peer review only

**$\Delta = 1.8\%$**   
 **$P < 0.001$  (95% CI 1.4-2)**

Figure 2 Intervention effect on HbA1c in patients with uncontrolled type 2 diabetes (n=100)

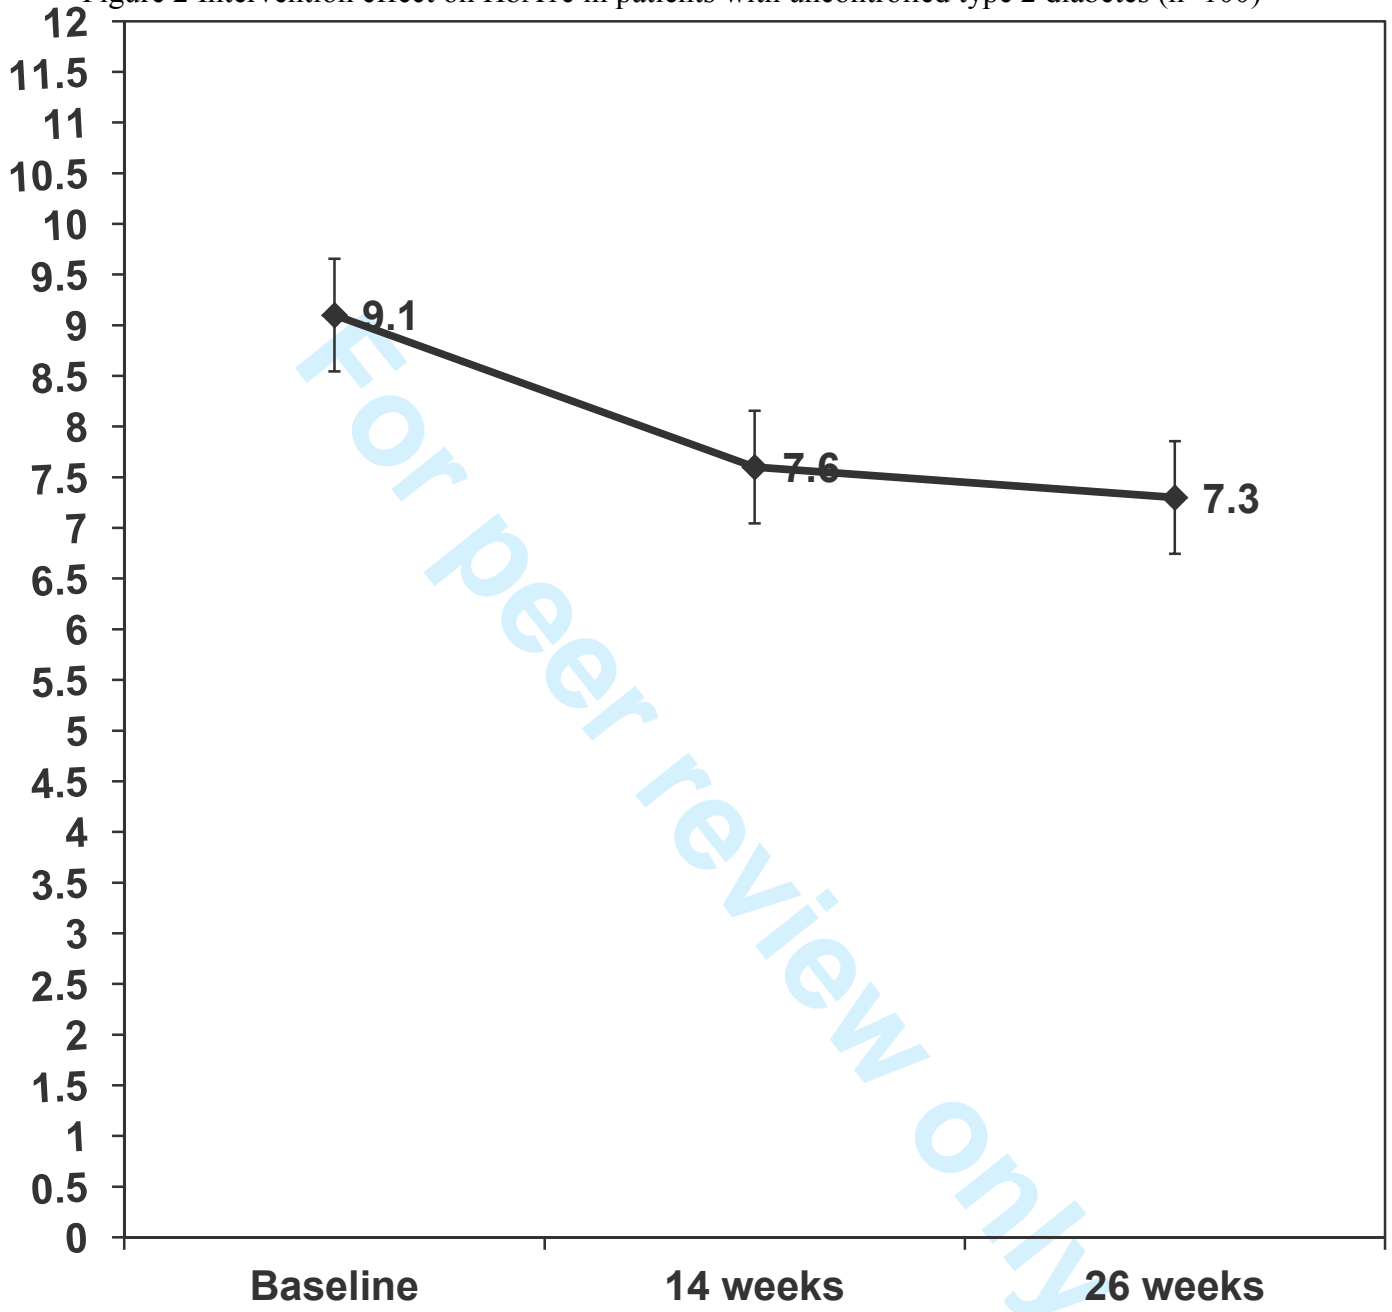



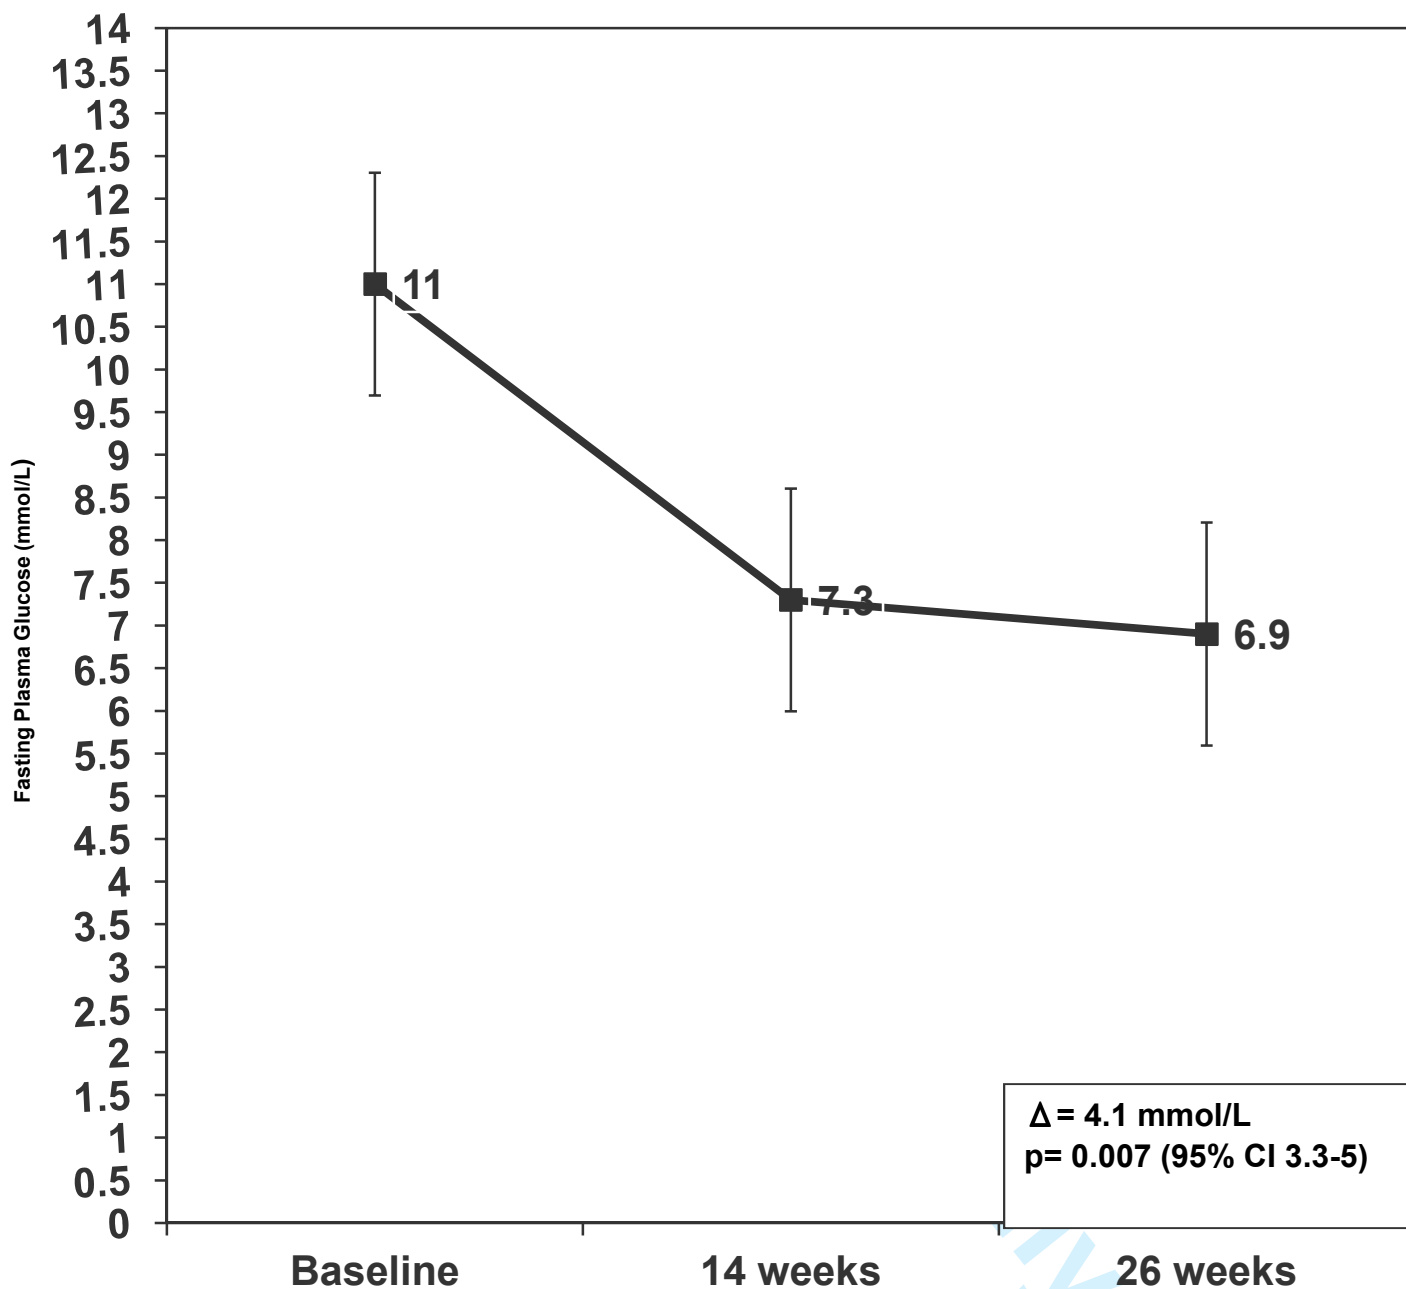

1  
2  
3  
4  
5  
6  
7  
8  
9  
10  
11  
12  
13  
14  
15  
16  
17  
18  
19  
20  
21  
22  
23  
24  
25  
26  
27  
28  
29  
30  
31  
32  
33  
34  
35  
36  
37  
38  
39  
40  
41  
42  
43  
44  
45  
46  
47  
48  
49  
50  
51  
52  
53  
54  
55  
56  
57  
58  
59  
60

Figure 3 Intervention effect on fasting plasma glucose in patients with uncontrolled type 2 diabetes (n=100)

For peer review only

1  
2  
3 **Pharmacist Intervention for Glycemic Control in the Community (The RxING study)**  
4

5 Yazid N Al Hamarneh, PhD, EPICORE Centre, Division of Cardiology, Department of  
6  
7  
8 Medicine, University of Alberta  
9

10 Theresa Charrois, MSc, School of Pharmacy, Curtin University  
11

12 Richard Lewanczuk, MD, PhD, Department of Medicine, University of Alberta  
13

14  
15 Ross T Tsuyuki, PharmD, MSc, Professor of Medicine and Director, EPICORE Centre, Division  
16  
17 of Cardiology, Department of Medicine, University of Alberta (Corresponding author)  
18

19  
20 EPICORE Centre  
21

22 220 College Plaza  
23

24 University of Alberta  
25

26  
27 Edmonton, Alberta  
28

29 T6G 2C8  
30

31 Tel: 780-492-8526  
32

33 Fax: 780-492-6059  
34

35  
36 [ross.tsuyuki@ualberta.ca](mailto:ross.tsuyuki@ualberta.ca)  
37  
38  
39

40  
41 Word count: 2305  
42

43 References: 22  
44

45 Tables: 3  
46  
47

48 Figures: 3  
49  
50  
51  
52  
53  
54  
55  
56  
57  
58  
59  
60

## Abstract

Objective: To determine the effect of a community pharmacist prescribing intervention on glycemic control in patients with poorly controlled type 2 diabetes.

Design: Pragmatic, before-after design

Setting: 12 community pharmacies in Alberta, Canada.

Participants: Type 2 diabetes receiving oral hypoglycemic medications and with HbA1c of 7.5-11%

Intervention: Pharmacists systematically identified potential candidates by inviting patients with Type 2 diabetes to test their HbA1c using validated point of care technology (DCA Vantage®). Pharmacists prescribed 10 units of insulin glargine at bedtime, adjusted by increments of 1 unit daily to achieve a morning fasting glucose of  $\leq 5.5$  mmol/L. The patients were followed at 2, 4, 8, 14, 20, and 26 weeks.

Primary outcome: Change in HbA1c from baseline to week 26.

Secondary outcomes: Proportion of patients achieving target HbA1c, changes in oral hypoglycemic agents, persistence on insulin glargine, number of insulin dosage adjustments per patient and number of hypoglycemic episodes.

Results: We screened 365 patients of whom 111 were eligible. Of those, 100 (90%) were enrolled in the study; all 11 patients who did not consent refused to use insulin.

Average age was 64 years (standard deviation (SD) 10.4), while average diabetes duration was 10.2 years (SD 7). HbA1c was reduced from 9.1% (SD 1) at baseline to 7.3% (SD 0.9) a change of 1.8% (95% CI 1.4-2,  $p < 0.001$ ). Fasting plasma glucose was reduced from 11 mmol/l (SD 3.3) to 6.9 mmol/l (SD 1.8), a change of 4.1 mmol/l (95% CI of 3.3-5,  $p = 0.007$ ). Fifty one percent of the patients achieved the target HbA1c of  $\leq 7\%$  at the end of the study.

1  
2  
3 Conclusion: This is the first completed study of independent prescribing by pharmacists. Our  
4  
5 results showed similar improvements in glycaemic control as previous physician-led studies.  
6  
7

8 RxING provides further evidence for the benefit of pharmacist care in diabetes.  
9

10 Trial registration: [clinicaltrials.gov](http://clinicaltrials.gov); Identifier: NCT01335763  
11  
12  
13  
14  
15  
16  
17  
18  
19  
20  
21  
22  
23  
24  
25  
26  
27  
28  
29  
30  
31  
32  
33  
34  
35  
36  
37  
38  
39  
40  
41  
42  
43  
44  
45  
46  
47  
48  
49  
50  
51  
52  
53  
54  
55  
56  
57  
58  
59  
60

For peer review only

## Article summary

### Article focus:

To determine the effect of a community pharmacist prescribing intervention on glycemetic control in patients with poorly controlled type 2 diabetes.

### Key Messages:

- Community pharmacist prescribing intervention on glycemetic control in patients with poorly controlled type 2 diabetes reduced patients' HbA1c from 9.1% at baseline to 7.3% at 26 weeks, a change of 1.8%. While fasting plasma glucose (FPG) was reduced from 11 mmol/L at baseline to 6.9 mmol/L at 26 weeks, a change of 4.1 mmol/L
- Pharmacists can systematically identify patients with poor glycemetic control, educate and support them to achieve better outcomes
- Since pharmacists see patients with diabetes frequently, we recommend getting the pharmacists more involved in delivering the care for patients with type 2 diabetes

### Strengths and limitations of the study:

- This is the first study of independent prescribing by pharmacists in patients with diabetes and it demonstrates a clinically important improvement in glycemetic control.
- The 26 week follow up period can be considered relatively short; it is possible that with a longer study more patients may have achieved the target HbA1c (or fewer if patients discontinued their insulin).
- We did observe a number of "hypoglycemic-type symptoms", however we were not able to confirm these as true hypoglycemia. We also have no frame of reference as patients may have experienced some of these symptoms prior to enrolling in our study. Finally,

1  
2  
3 the number of reported “hypoglycemic-type symptoms” in this study was consistent with  
4  
5 the findings reported in the literature.  
6  
7  
8  
9

10 **Financial acknowledgements:** This work was supported by unrestricted investigator-initiated  
11 funding provided by Sanofi Canada and the testing equipments were provided by ManthaMed.  
12  
13

14  
15  
16 **Role of the Sponsors:** The funders had no role in the design and conduct of the study; in the  
17 collection, analysis, and interpretation of the data; or in the preparation, review, or approval of  
18 the manuscript.  
19  
20  
21  
22  
23  
24  
25  
26  
27  
28  
29  
30  
31  
32  
33  
34  
35  
36  
37  
38  
39  
40  
41  
42  
43  
44  
45  
46  
47  
48  
49  
50  
51  
52  
53  
54  
55  
56  
57  
58  
59  
60

Peer review only

## Introduction

Currently, 347 million individuals are living with diabetes worldwide (1). Approximately 90% of those individuals have type 2 diabetes (1). The number of new cases of type 2 diabetes is rapidly increasing mainly because of obesity and an ageing population (2).

Because of its chronic nature and the severe complications associated with it, diabetes carries a health and a financial burden on the affected individual and health systems (3). Poorly controlled diabetes puts patients at high risk of suffering from macrovascular and microvascular complications (4).

Type 2 diabetes is a progressive disease; it has been reported that 50% of the insulin producing capacity is lost at the time of diagnosis with an average loss rate of 5% per year afterwards (5).

As a result, many patients with type 2 diabetes will eventually require the use of insulin; however, clinicians seem reluctant to start insulin (6) despite the evidence from studies such as INSIGHT, which demonstrated improved glycemic control with the addition of insulin glargine to oral hypoglycemic agents in patients with type 2 diabetes (7) as well as guidelines that recommending starting insulin immediately if the patients HbA1c is  $\geq 9\%$  (8).

Clinicians' reluctance to initiating insulin due to unfamiliarity with the treatment or using it as a last resort (9) plays a major role in influencing the patient's decision to commence insulin treatment regimen. It has been reported that many patients have 'psychological insulin resistance' where they are unwilling to take insulin because of certain beliefs that insulin will not



1  
2  
3 be beneficial and in some cases it may even be harmful. Personal experience and messages from  
4 different healthcare professionals can also affect the patient's decisions regarding insulin  
5 treatment regimen (6, 10).  
6  
7  
8  
9  
10  
11 -

12  
13  
14  
15 Pharmacists are front line healthcare professionals who see patients with diabetes more  
16 frequently than physicians (15 times/year Vs 7 times/year) (11) and as such, could proactively  
17 and systematically identify patients with poorly controlled type 2 diabetes in a broad-based  
18 public health approach to chronic disease management (12). Indeed, there is good evidence for  
19 the efficacy of pharmacist care in diabetes (13). In community settings, pharmacists have  
20 demonstrated that they are capable of identifying poorly controlled patients, educate patients  
21 regarding diabetes, medications and self-monitoring of plasma glucose, provide adherence  
22 support, identify and resolve diabetes problems and complications and setting goals in order  
23 reduce the patients' HbA1c, plasma glucose and improve their quality of life and other co-  
24 morbidities (4, 12 - 16). Moreover, the scope of practice for pharmacists in Alberta is changing,  
25 allowing pharmacists to prescribe medications and order laboratory tests. As such, there is an  
26 unprecedented opportunity to identify and improve glycemic control in patients with type 2  
27 diabetes.  
28  
29  
30  
31  
32  
33  
34  
35  
36  
37  
38  
39  
40  
41  
42  
43  
44  
45  
46  
47

48 The main aim of the RxING study was to determine the effect of a community pharmacist  
49 prescribing intervention on glycemic control in patients with poorly controlled type 2 diabetes.  
50  
51  
52  
53  
54  
55  
56  
57  
58  
59  
60

## Methods

### Study design and setting

RxING was a multicentre pragmatic before-after design trial, which was conducted in 12 community pharmacies in the province of Alberta, Canada.

We chose the before-after design because we had concerns about withholding insulin from this high risk group. Those concerns were based on guidelines recommendations (8) and the evidence from studies such as INSIGHT (7).

All participating pharmacists, who were either certified diabetes educators (CDE) or preparing to be CDE, received face to face training by the study team. The training material was based on the most recent Canadian guidelines and recommendations (7,8). They also received a manual of operations to help them conduct the study.

### Study participants

We recruited adults -who had physician diagnosed type 2 diabetes for at least six months and were receiving one or more oral hypoglycemic agents, had a HbA1c between 7.5% and 11%, and who were willing to sign an informed consent.

We excluded patients who were unwilling to use insulin, previously or currently using insulin (confirmed by the patient's medication records), had a history of ketoacidosis (confirmed by the patient's healthcare records), were pregnant, worked night shifts, had renal impairment (serum creatinine of  $\geq 124$  mmol/l for females or  $\geq 133$  mmol/l for males) (confirmed by the patient's

1  
2  
3 [healthcare records](#)), were clinically unstable ([based on the pharmacist's judgment](#)), were  
4  
5 unwilling or unable to attend follow-up visits, or felt to be unlikely to adhere to study procedures  
6  
7 due to cognitive limitations ([based on the pharmacist's judgment](#)), severe psychiatric disorders or  
8  
9 alcoholism ([confirmed by the patient's healthcare records](#)).  
10  
11  
12  
13

### 14 15 [Recruitment](#)

16  
17 Pharmacists systematically identified potential candidates [from within their practice](#) by inviting  
18  
19 patients with type 2 diabetes (e.g., patients on metformin) to test their HbA1c in the pharmacy  
20  
21 using validated point of care technology (DCA Vantage®, Siemens, Tarrytown, New York,  
22  
23 USA). If the result of the HbA1c test was high (7.5-11 %) and the patient met the other inclusion  
24  
25 criteria for the study the patient was asked if he/she wanted to participate in the study. After  
26  
27 providing written informed consent, the patient was enrolled in the study. If HbA1c was > 11%  
28  
29 the patient was assessed by the study investigators, and the patient was referred to his/her  
30  
31 physician.  
32  
33  
34  
35  
36  
37  
38

### 39 [Intervention](#)

40  
41 The patient was prescribed 10 units insulin glargine at bedtime, and was asked to titrate the dose  
42  
43 by 1 unit/day to achieve a fasting plasma glucose of  $\leq 5.5$  mmol/L (7, 17). The intervention also  
44  
45 included patient education regarding insulin use, dose titration and self monitoring. Patients  
46  
47 contacted the pharmacist when they reached a fasting plasma glucose of 6 mmol/L. All patients  
48  
49 remained on their previously prescribed oral hypoglycemic agent(s). [If the combination with](#)  
50  
51 [insulin was not approved in Canada, the oral hypoglycemic agent was discontinued \(e.g.,](#)  
52  
53 [thiazolidinedione\)](#). Adjustments were made at the discretion of the treating pharmacist [based on](#)  
54  
55  
56  
57  
58  
59  
60

1  
2  
3 | [the most recent Canadian guidelines \(8\)](#). The patient's family physician received a letter from the  
4  
5  
6 | pharmacist to inform him/her that the patient was participating in the study.  
7  
8  
9

#### 10 | [Follow-up](#)

11  
12 | Patients were followed at 2, 4, 8, 14, 20, and 26 weeks to provide ongoing care, check adherence  
13  
14 | to the insulin regimen, fasting blood sugars (measured by the patient), insulin dose and titration  
15  
16 | and adverse events. HbA1c was measured at weeks 14 and 26 using the same technique used at  
17  
18 | baseline. Family physicians were kept informed of patient's progress and any medication change  
19  
20 | after each visit.  
21  
22  
23  
24  
25  
26

#### 27 | [Outcomes](#)

28  
29 | The primary outcome measure was the change in HbA1c from baseline to week 26. Secondary  
30  
31 | outcomes included: Proportion of patients achieving target HbA1c (defined as  $HbA1c \leq 7.0\%$ ),  
32  
33 | changes in oral hypoglycemic agents, persistence on insulin glargine (% still taking insulin at the  
34  
35 | end of follow-up), number of insulin dosage adjustments per patient, number of hypoglycemic  
36  
37 | episodes.  
38  
39  
40  
41  
42

#### 43 | [Sample size calculation](#)

44  
45 | With a sample size of 80 patients and the following assumptions: a standard deviation of 1.1 and  
46  
47 | a 2 sided alpha of 0.05 (7) we calculated 90% power to detect a mean decrease in HbA1c of  
48  
49 | 0.4%. Since this a pragmatic, practice-based trial, the sample size was inflated to 100 to account  
50  
51 | for possible losses to follow-up.  
52  
53  
54  
55  
56  
57  
58  
59  
60

1  
2  
3  
4  
5  
6  
7  
8  
9  
10  
11 *Data analysis*

12 The level of significance was set at 0.05. All analyses were done on intention to treat basis.

13 Missing data were imputed using a last value carried forward strategy. The mean HbA1c  
14 between baseline and 26 weeks was compared using a paired t-test. Secondary outcomes were  
15 analyzed using paired t-tests and basic frequencies. Linear regression was used to adjust for the  
16 patients' demographics and clinical characteristics.  
17  
18  
19  
20  
21  
22  
23  
24  
25  
26

27 RxING was approved by the Health Research Ethics Board of the University of Alberta and was  
28 registered on clinicaltrials.gov (NCT01335763).  
29  
30  
31  
32  
33  
34  
35  
36  
37  
38  
39  
40  
41  
42  
43  
44  
45  
46  
47  
48  
49  
50  
51  
52  
53  
54  
55  
56  
57  
58  
59  
60

## Results

We screened 356 patients with type 2 diabetes; 245 were excluded because they did not meet the HbA1c inclusion criteria. Out of the 111 eligible patients, 11 were not enrolled because they refused to use insulin, leaving 100 patients enrolled (Figure 1)

The demographic and clinical characteristics of the patients are reported in Table 1. The mean age was 64 years (Standard Deviation (SD) 10.4) and had a diabetes duration of 10.2 years (SD 7). Fifty-eight percent of the patients were male, 77% were married and 90% reported having at least high school education. Nearly half of the patients (48%) were retired, almost ninety percent (89%) were white (ethnicity was self reported) and nearly half (47%) have a government medication coverage. Around one quarter of the patients (22%) reported that they were smokers, [and more than half \(54%\) reported occasional consumption of alcohol \(e.g. 1-3 drinks/week\).](#) [Nearly two thirds of the patients had elevated blood pressure \(63%\) and elevated cholesterol \(64%\) \(hypertension and high cholesterol were self reported\).](#)

All but 1 patient was taking insulin glargine at the end of the study (he stopped his insulin before the final visit because his plasma glucose readings were “good”). At the end of the study the mean insulin glargine dose was 31.1 units (SD 18.4) with a mean of 21.1 dose adjustments (SD 18.8) per patient.

HbA1c was reduced from 9.1% (SD 1) at baseline to 7.3% (SD 0.9) at 26 weeks, a change of 1.8% (95% CI 1.4-2,  $p < 0.001$ ) (Figure 2). While fasting plasma glucose (FPG) was reduced from

1  
2  
3 11 mmol/L (SD 3.3) at baseline to 6.9 mmol/L (SD 1.8) at 26 weeks, a change of 4.1 mmol/L  
4  
5 (95% CI of 3.3-5, p= 0.007) (Figure 3).  
6  
7

8  
9  
10 Fifty one percent of the patients achieved the target HbA1c of  $\leq 7\%$  at the end of the study. [At](#)  
11 [baseline, two thirds \(66%\) of the patients were taking two or more medications \(Table 2\), the](#)  
12 [most widely used combination was metformin and gliclazide, followed metformin and glyburide](#)  
13 [and metformin and repaglinide.](#) Nearly half of the patients (48%) had their oral hypoglycemic  
14 regimen altered (Table 3); the most frequent alterations were stopping sulfonylurea (46%)  
15 followed by initiating meglitinides (23%), stopping metformin (21%) and stopping  
16 thiazolidinedione and DPP4 inhibitors (19%). [Those alterations were made by the pharmacists](#)  
17 [who then informed the patients' family physicians.](#)  
18  
19  
20  
21  
22  
23  
24  
25  
26  
27  
28  
29

30  
31 There was an apparent slight increase in the body mass index (BMI) and waist circumference  
32 between baseline and the end of the study but this increase was not statistically significant (31.6  
33 (SD 6.3) to 32.6 (SD 6.3), p=0.29 and 106 (SD 13.8) to 107.4 (SD 12.9), p=0.5 respectively).  
34  
35  
36  
37  
38  
39

40  
41 Hypoglycemic-[type](#) -symptoms were reported by 54 patients. Only 2 of these episodes required  
42 medical attention ([one caused a visit to the family physician while the other required a visit to](#)  
43 [the emergency department without an overnight stay](#)). We were not able to confirm that these  
44 episodes were true hypoglycemia, [via blood glucose measurements, nor did we have baseline](#)  
45 [information on such symptoms](#) .  
46  
47  
48  
49  
50  
51  
52  
53  
54  
55  
56  
57  
58  
59  
60

1  
2  
3  
4  
5  
6  
7  
8  
9  
10  
11  
12  
13  
14  
15  
16  
17  
18  
19  
20  
21  
22  
23  
24  
25  
26  
27  
28  
29  
30  
31  
32  
33  
34  
35  
36  
37  
38  
39  
40  
41  
42  
43  
44  
45  
46  
47  
48  
49  
50  
51  
52  
53  
54  
55  
56  
57  
58  
59  
60

| \_\_\_\_\_

For peer review only



1  
2  
3  
4  
5  
6  
7  
8  
9  
10  
11  
12  
13  
14  
15  
16  
17  
18  
19  
20  
21  
22  
23  
24  
25  
26  
27  
28  
29  
30  
31  
32  
33  
34  
35  
36  
37  
38  
39  
40  
41  
42  
43  
44  
45  
46  
47  
48  
49  
50  
51  
52  
53  
54  
55  
56  
57  
58  
59  
60

For peer review only

## Discussion

We found that a community pharmacist prescribing intervention in patients with poorly controlled type 2 diabetes improved patients' HbA1c by an absolute value of 1.8% (95% CI 1.4-2,  $p < 0.001$ ) and fasting plasma glucose by 4.1 mmol/L (95% CI of 3.3-5,  $p = 0.007$ ). This is the first study of independent prescribing by pharmacists in patients with diabetes and represents a clinically important improvement in glycaemic control.

Our findings are consistent with the findings of Gerstein and colleagues (2006) and Harris and colleagues (2008) who compared the effect of adding insulin glargine to the oral hypoglycaemic regimen versus the conventional therapy where oral hypoglycaemic agent doses were adjusted. They reported better glycaemic control in the insulin glargine group after 26 weeks of follow up (7, 9). Our findings are also consistent with the findings of Wubben and Vivian (2008) who conducted a systematic review to assess the effectiveness of pharmacist intervention in patients with diabetes in outpatient settings. They reported additional HbA1c reduction (when compared to usual care) of 0.5% when pharmacists did not have prescribing authority and 1% when pharmacists had prescribing authority (collaborative prescribing in this case) (13).

It has been reported in the literature that the adherence rates to the insulin regimen are unsatisfactory (19); however in our study, 99% of the patients were adherent to their treatment regimen for 6 months, this can be explained by the intensive intervention provided by the pharmacist and the relatively short duration of the study.

1  
2  
3 The slight increase in BMI and waist circumference in our study is consistent with the findings  
4  
5 of Heine and colleagues (2005) and Russell-Jones and colleagues (2009) who compared the  
6  
7 efficacy of insulin glargine to an active diabetes treatment and reported that there was a slight  
8  
9 increase in BMI and waist circumference in patients who used insulin glargine after 26 weeks  
10  
11  
12 [\(20, 21\)](#).

13  
14  
15  
16  
17 This study is not without limitations. The 26 week follow up period can be considered relatively  
18  
19 short; it is possible that with a longer study more patients may have achieved the target HbA1c  
20  
21 (or fewer if patients discontinued their insulin). [Patients who were unwilling to use insulin were](#)  
22  
23 [excluded from the study; however patients' willingness to use insulin was high in our pilot study](#)  
24  
25 [\(4\) and also during the screening process. The proactive and systematic approach that we used in](#)  
26  
27 [this study also helped in identifying patients who could benefit from insulin-. We acknowledge](#)  
28  
29 [that adding insulin to the oral hypoglycemic agent\(s\) regimen is one of the options which are](#)  
30  
31 [available to improve glycemic control; however this choice was based on the insulin's efficacy](#)  
32  
33 [and safety profile.](#) We did observe a number of “hypoglycemic-type symptoms”, however we  
34  
35 were not able to confirm these as true hypoglycemia. We also have no frame of reference as  
36  
37 patients may have experienced some of these symptoms prior to enrolling in our study. Finally,  
38  
39 the number of reported “hypoglycemic-type symptoms” in this study was consistent with the  
40  
41 findings of a meta analysis of more than 1100 diabetes patients who were using insulin glargine  
42  
43  
44  
45  
46  
47  
48 [\(22\)](#).

49  
50  
51  
52  
53 Our findings take the evidence for the benefits of pharmacist care in diabetes one step further.  
54  
55  
56 That prescribing insulin improves glycemic control in itself is perhaps not surprising; what is  
57  
58  
59  
60

1  
2  
3 important is that pharmacists can systematically identify patients with poor glycemic control,  
4 educate and support patients to achieve better outcomes. Since pharmacists see patients with  
5  
6  
7  
8 diabetes frequently ([11](#)), this [can be an](#) attractive approach.  
9  
10

11  
12  
13  
14  
15  
16  
17 **Acknowledgements:** The authors would like to acknowledge the participation of the following  
18 pharmacists and pharmacies in making this study possible: Rick Siemens ( London Drugs,  
19 Lethbridge), Darsey Milford ( Turtle Mountain Pharmacy, Bellevue), Rita Bowron, Rami  
20 Chowaniec, Nader Hammoud, Carol Wei, Sheilah Kostecki ( Safeway Pharmacy, Edmonton and  
21 Calgary), Anita Brown (Shoppers Drug Mart, Okotoks), Janelle Fox, Tony Nickonchuck  
22 (Walmart Pharmacy Cold Lake and Peace River), Rita Lyster (Rita's Apothecary and Home  
23 Healthcare, Barrhead) and Anita and Warren Dobson (Medicine Shoppe, Calgary).  
24  
25  
26  
27  
28  
29  
30  
31  
32  
33

34 **Funding:** This work was supported by unrestricted investigator-initiated funding provided by  
35 Sanofi Canada and the testing equipments were provided by ManthaMed.  
36  
37  
38

39 **Role of the Sponsors:** The funders had no role in the design and conduct of the study; in the  
40 collection, analysis, and interpretation of the data; or in the preparation, review, or approval of  
41 the [final](#) manuscript.  
42  
43  
44  
45

46 **Contributors:** All the authors have made substantial contributions to the manuscript. These  
47 contributions are as the following: Al Hamarneh had full access to all of the data in the study and  
48 takes responsibility for the integrity of the data and the accuracy of the data analysis. *Study*  
49 *concept and design:* Tsuyuki and Charrois. *Acquisition of data:* Tsuyuki and Al  
50 Hamarneh. *Analysis and interpretation of data:* Tsuyuki and Al Hamarneh. *Drafting of the*  
51  
52  
53  
54  
55  
56  
57  
58  
59  
60

1  
2  
3 *manuscript*: Tsuyuki and Al Hamarneh. *Critical revision of the manuscript for important*  
4  
5 *intellectual content*: Tsuyuki, Lewanczuk, Charrois and Al Hamarneh. *Statistical analysis*:  
6  
7  
8 Tsuyuki and Al Hamarneh. *Administrative, technical, and material support*: Tsuyuki,  
9  
10 Lewanczuk, Charrois and Al Hamarneh. *Study supervision*: Tsuyuki and Lewanczuk.  
11

12 **Competing interests:** None declared

13 **Ethics approval:** Health Research Ethics Board of the University of Alberta

14 **Data sharing statement:** All obtained data have been analysed and reported in the manuscript.  
15  
16  
17  
18  
19

20 Any further queries can be resolved by contacting the authors  
21  
22  
23  
24  
25  
26  
27  
28  
29  
30  
31  
32  
33  
34  
35  
36  
37  
38  
39  
40  
41  
42  
43  
44  
45  
46  
47  
48  
49  
50  
51  
52  
53  
54  
55  
56  
57  
58  
59  
60

**References:**

1. World Health Organization. Diabetes. 2012. Available on:  
<http://www.who.int/mediacentre/factsheets/fs312/en/> (accessed February 2013).
2. Lipscombe LL, Hux JE. Trends in diabetes prevalence, incidence and mortality in Ontario, Canada 1995-2005: a population based study. *Lancet*. 2007; 369:750-756.
3. World Health Organization. Diabetes: the cost of diabetes. 2012. Available on:  
<http://www.who.int/mediacentre/factsheets/fs236/en/> (accessed February, 2013)
4. Al Hamarneh YN, Rosenthal M, Tsuyuki RT. Glycemic control in community-dwelling patients with type 2 diabetes. *Can Pharm J*. 2012; 2: 68-69e1.
5. Lebovitz HE. Insulin secretagogues: old and new. *Diabetes Rev*. 1999; 7:139-153.
6. Polonsky WH, Jackson RA. What's so tough about taking insulin? *Clin Diabetes*. 2004; 22:147-50.
7. Gerstein HC, Yale JF, Harris SB, et al. A randomized trial of adding insulin glargine vs. avoidance of insulin in people with Type 2 diabetes on either no oral glucose-lowering agents or submaximal doses of metformin and/or sulphonylureas. The Canadian INSIGHT study. *Diabet Med*. 2006;23:736-42.

- 1  
2  
3  
4  
5  
6 8. Canadian Diabetes Association. Canadian Diabetes Association 2008 Clinical Practice  
7  
8 Guidelines for the Prevention and Management of Diabetes in Canada. Can J Diabetes.  
9  
10 2008;32:s1-s201.  
11
- 12 ~~8.9.~~ Harris S, Yale JF, Dempsey E, Gerstein H. Can family physicians help patients initiate  
13  
14 basal insulin therapy successfully? Randomized trial of patient-titrated insulin glargine  
15  
16 compared with standard oral therapy: Lessons for family practice from Canadian INSIGHT  
17  
18 trial. Can Fam Physicians. 2008; 54: 550-558.  
19  
20  
21
- 22 10. Polonsky WH, Fisher L, Guzman S et al. Psychological insulin resistance in patients with  
23  
24 type 2 diabetes. Diabetes Care. 2005; 28: 2543-2545  
25  
26  
27  
28  
29  
30  
31  
32  
33  
34  
35
- 36 ~~9.11.~~ Shiu JR, Simpson SH, Johnson JA, Tsuyuki RT. Quantifying opportunities to affect  
37  
38 diabetes management in the community. Can Pharm J. 2006; 139(3): 37-38.  
39  
40  
41  
42
- 43 12. O'Donovan Dog, Byrne S, Sahn L. The role of pharmacists in control and management of  
44  
45 type 2 diabetes mellitus; a review of the literature. J Diabetology. 2011; 1: 5-21.  
46  
47  
48  
49
- 50 ~~10.13.~~ Wubben DP, Vivian EM. Effects of pharmacist outpatient interventions on adults with  
51  
52 diabetes mellitus: a systematic review. Pharmacotherapy. 2008; 28: 421-436.  
53  
54  
55  
56  
57  
58  
59  
60

- 1  
2  
3  
4  
5  
6  
7  
8  
9  
10  
11  
12  
13  
14  
15  
16  
17  
18  
19  
20  
21  
22  
23  
24  
25  
26  
27  
28  
29  
30  
31  
32  
33  
34  
35  
36  
37  
38  
39  
40  
41  
42  
43  
44  
45  
46  
47  
48  
49  
50  
51  
52  
53  
54  
55  
56  
57  
58  
59  
60
14. [Armour CL, Taylor SJ, Houriham F et al. Implementation and evaluation of Australian pharmacists' diabetes care services. J Am Pharm Assoc. 2004; 44: 455-466.](#)
15. [Fornos JA, Andres NF, Andres JC et al. A pharmacotherapy follow-up program in patients with type-2 diabetes in community pharmacies in Spain. Pharm World Sci. 2006; 28: 65-72.](#)
16. [Krass I, Armour CL, Mitchell B, et al. The pharmacy diabetes care program: assessment of a community pharmacy diabetes service model in Australia. Diabet Med. 2007; 24: 677-683.](#)
- ~~11.~~17. [Strange P. Treat-to-target insulin titration algorithms when initiating long or intermediate acting insulin in type 2 diabetes. J Diabetes Sci Technol. 2007; 1: 540 -548.](#)
- ~~12.~~18. [Raskin P, Gylvin T, Weng W, Chaykin I. Comparison of insulin detemir and insulin glargine using a basal-bolus regimen in a randomized, controlled clinical study in patients with type 2 diabetes. Diabetes Metab Res Rev. 2009; 25: 542-548.](#)
- ~~13.~~19. [Hartman I. Insulin Analogs: Impact on Treatment Success, Satisfaction, Quality of Life, and Adherence. Clin Med Res. 2008; 6: 54-67.](#)



1  
2  
3 14.20. Heine RJ, Van Gaal LF, Johns D, et al. Exenatide versus Insulin Glargine in Patients with  
4 Suboptimally Controlled Type 2 Diabetes. A Randomized trial. Ann Intern Med. 2005;  
5  
6 143: 559-569.  
7  
8

9  
10 15.21. Russell-Jones D, Vaag A, Schmitz O, et al. Liraglutide vs insulin glargine and placebo in  
11 combination with metformin and sulfonylurea therapy in type 2 diabetes mellitus (LEAD-5  
12 met+SU): a randomised controlled trial. Diabetologia. 2009; 52: 2046-2055.  
13  
14  
15

16  
17  
18 16.22. Rosenstock J, Dailey G, Massi-Benedetti M, et al. Reduced hypoglycemia risk with  
19 insulin glargine in type 2 diabetes. Diabetes Care. 2005; 28:950-955.  
20  
21  
22  
23  
24  
25  
26  
27  
28  
29  
30  
31  
32  
33  
34  
35  
36  
37  
38  
39  
40  
41  
42  
43  
44  
45  
46  
47  
48  
49  
50  
51  
52  
53  
54  
55  
56  
57  
58  
59  
60

Table 1 Demographic and clinical characteristics of the patients (N=100)

| <b>Characteristic</b>         | <b>Frequency</b> |
|-------------------------------|------------------|
| <b>Gender</b>                 |                  |
| Male                          | 58               |
| Female                        | 42               |
| <b>Marital status</b>         |                  |
| Single                        | 8                |
| Married                       | 77               |
| Divorced                      | 9                |
| Widowed                       | 6                |
| <b>Education</b>              |                  |
| Grade School                  | 10               |
| High School                   | 36               |
| Some post secondary education | 26               |
| Post secondary education      | 28               |
| <b>Employment</b>             |                  |
| Caring for family             | 1                |
| Working for profit/pay        | 36               |
| Unemployed/looking for a job  | 6                |
| Retired                       | 48               |
| Other                         | 9                |
|                               |                  |

|                                           |    |
|-------------------------------------------|----|
| <b>Self reported Ethnicity</b>            |    |
| Aboriginal/first nation                   | 1  |
| White                                     | 89 |
| South Asian                               | 1  |
| Oriental                                  | 4  |
| Other                                     | 4  |
| Declined                                  | 1  |
| <b>Medication coverage</b>                |    |
| Private                                   | 29 |
| Government                                | 47 |
| Out of pocket                             | 15 |
| Private and government                    | 7  |
| Private and out of pocket                 | 2  |
| <b>Smoking status</b>                     |    |
| Smoker                                    | 22 |
| Ex-smoker                                 | 41 |
| Non-smoker                                | 37 |
| <b>Alcohol consumption</b>                |    |
| No Alcohol                                | 43 |
| Occasional alcohol (e.g. 1-3 drinks/week) | 54 |
| 1-2 alcohol drinks per day                | 3  |
|                                           |    |

1  
2  
3  
4  
5  
6  
7  
8  
9  
10  
11  
12  
13  
14  
15  
16  
17  
18  
19  
20  
21  
22  
23  
24  
25  
26  
27  
28  
29  
30  
31  
32  
33  
34  
35  
36  
37  
38  
39  
40  
41  
42  
43  
44  
45  
46  
47  
48  
49  
50  
51  
52  
53  
54  
55  
56  
57  
58  
59  
60

|                                       |           |
|---------------------------------------|-----------|
| <u>Self reported Hypertension</u>     |           |
| <u>Yes</u>                            | <u>63</u> |
| <u>No</u>                             | <u>36</u> |
| <u>Unknown</u>                        | <u>1</u>  |
| <u>Self reported high cholesterol</u> |           |
| <u>Yes</u>                            | <u>64</u> |
| <u>No</u>                             | <u>33</u> |
| <u>Unknown</u>                        | <u>3</u>  |

For peer review only

Table 2 Number of oral hypoglycemic agents used by patients and Mean HbA1c

| <u>Number of oral agents</u> | <u>Frequency</u> | <u>Mean HbA1c (SD)</u> |
|------------------------------|------------------|------------------------|
| <u>1</u>                     | <u>34</u>        | <u>8.7 (0.9)</u>       |
| <u>2</u>                     | <u>56</u>        | <u>9.1 (0.9)</u>       |
| <u>3</u>                     | <u>7</u>         | <u>9.8 (1.6)</u>       |
| <u>4</u>                     | <u>3</u>         | <u>8.7 (0.7)</u>       |

For peer review only

Table 3 Oral hypoglycemic use at baseline and the end of the study

| <b>Medication</b>        | <b>Baseline (N=100)</b> | <b>26 weeks (N=93)</b> |
|--------------------------|-------------------------|------------------------|
| <b>Metformin</b>         | 88                      | 78                     |
| <b>Sulfonylurea</b>      | 54                      | 32                     |
| <b>Meglitinides</b>      | 18                      | 29                     |
| <b>DPP4</b>              | 12                      | 3                      |
| <b>Thiazolidinedione</b> | 9                       | 0                      |

1  
2  
3  
4  
5  
6  
7  
8  
9  
10  
11  
12  
13  
14  
15  
16  
17  
18  
19  
20  
21  
22  
23  
24  
25  
26  
27  
28  
29  
30  
31  
32  
33  
34  
35  
36  
37  
38  
39  
40  
41  
42  
43  
44  
45  
46  
47  
48  
49  
50  
51  
52  
53  
54  
55  
56  
57  
58  
59  
60

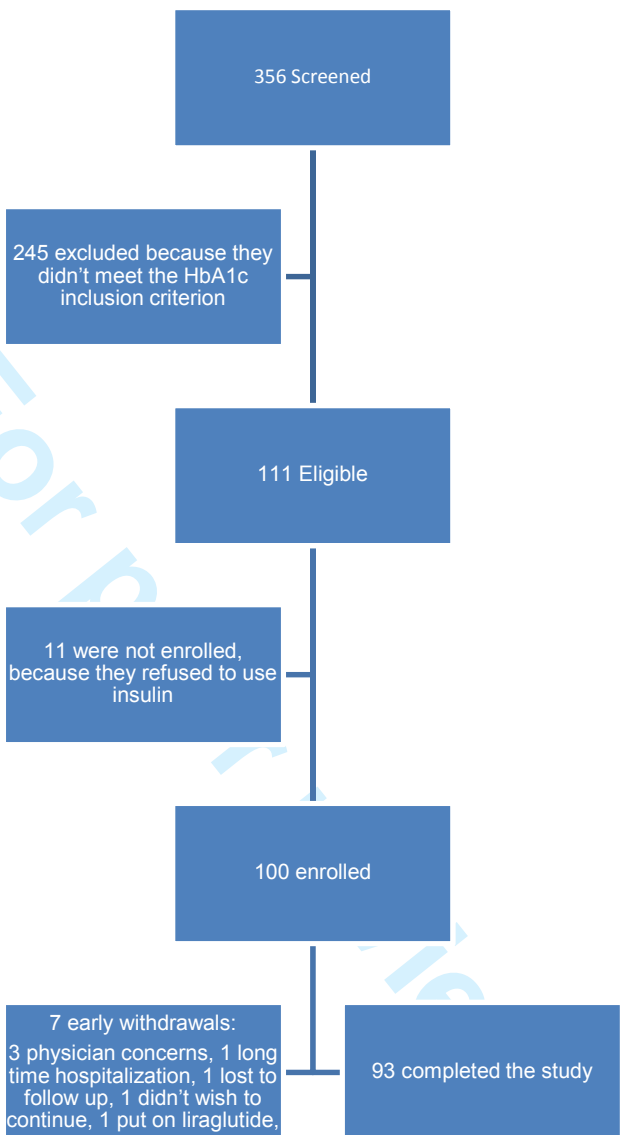

Figure 1 Patients' screening and enrollment flow chart

---

1  
2  
3  
4  
5  
6  
7  
8  
9  
10  
11  
12  
13  
14  
15  
16  
17  
18  
19  
20  
21  
22  
23  
24  
25  
26  
27  
28  
29  
30  
31  
32  
33  
34  
35  
36  
37  
38  
39  
40  
41  
42  
43  
44  
45  
46  
47  
48  
49  
50  
51  
52  
53  
54  
55  
56  
57  
58  
59  
60

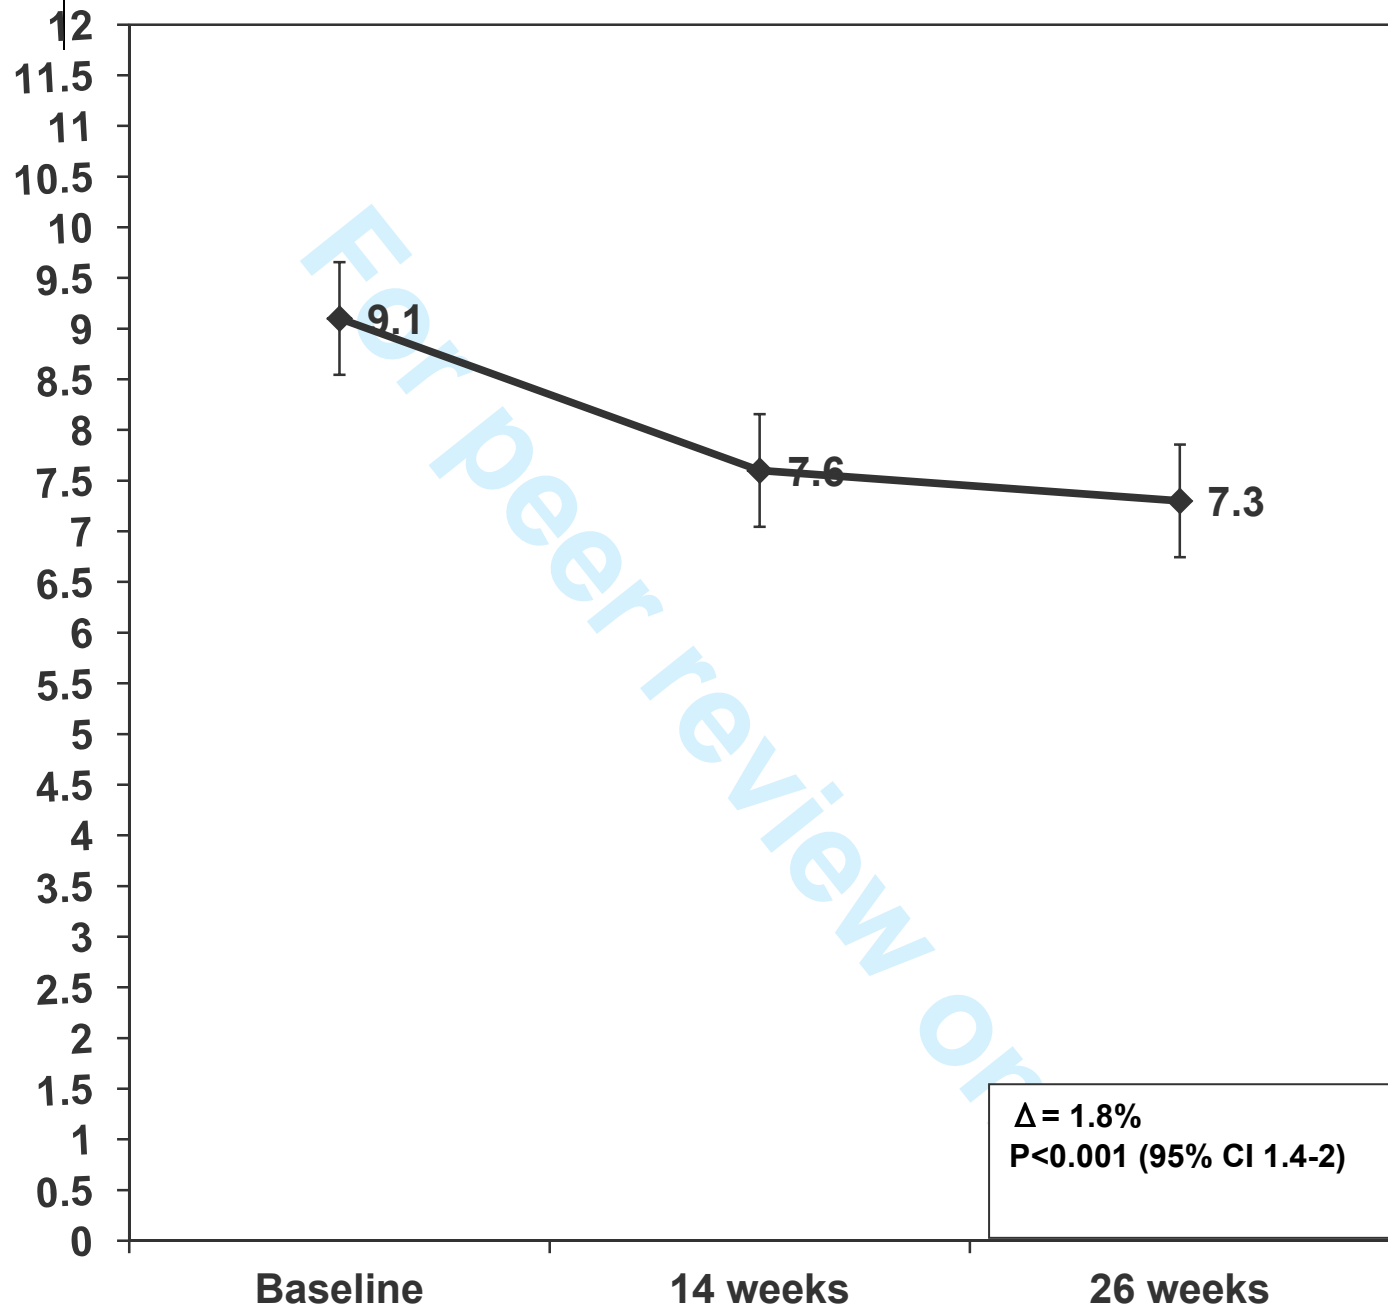



1  
2  
3 Figure 2 Intervention effect on HbA1c in patients with uncontrolled type 2 diabetes (n=100)  
4  
5  
6  
7  
8  
9  
10  
11  
12  
13  
14  
15  
16  
17  
18  
19  
20  
21  
22  
23  
24  
25  
26  
27  
28  
29  
30  
31  
32  
33  
34  
35  
36  
37  
38  
39  
40  
41  
42  
43  
44  
45  
46  
47  
48  
49  
50  
51  
52  
53  
54  
55  
56  
57  
58  
59  
60

---



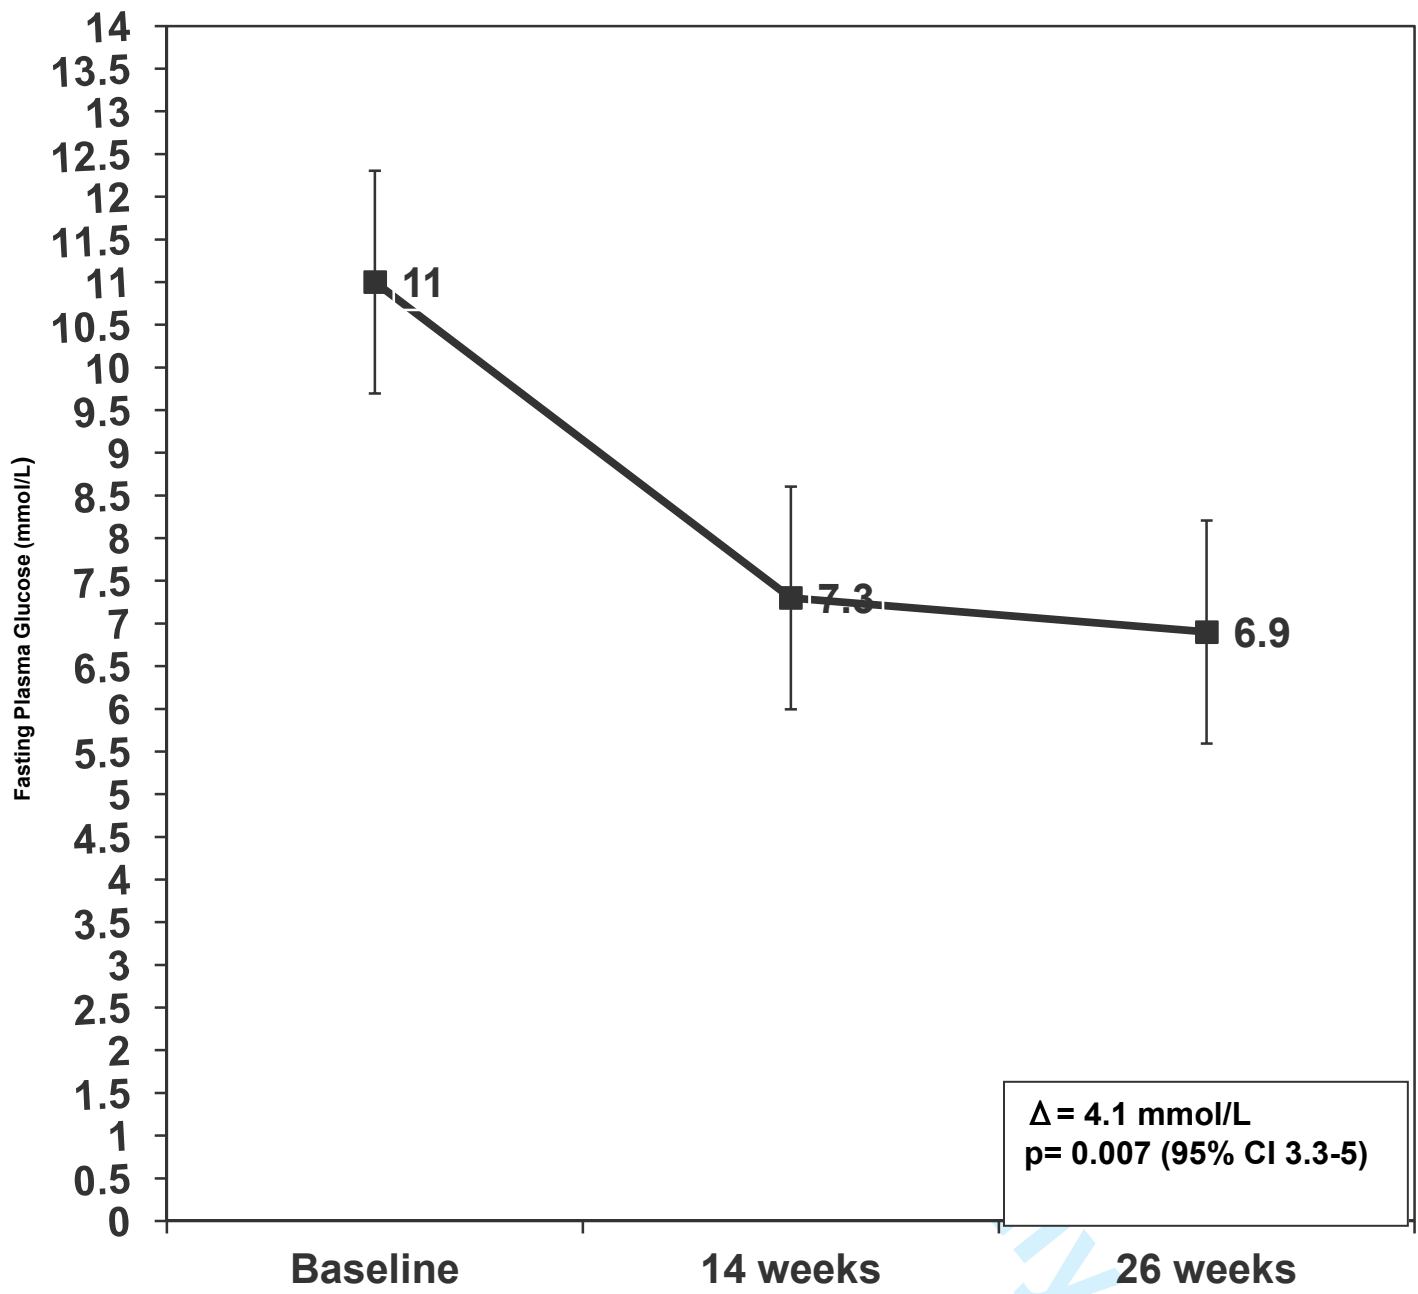

1  
2  
3  
4  
5  
6  
7  
8  
9  
10  
11  
12  
13  
14  
15  
16  
17  
18  
19  
20  
21  
22  
23  
24  
25  
26  
27  
28  
29  
30  
31  
32  
33  
34  
35  
36  
37  
38  
39  
40  
41  
42  
43  
44  
45  
46  
47  
48  
49  
50  
51  
52  
53  
54  
55  
56  
57  
58  
59  
60

1  
2  
3 Figure 3 Intervention effect on fasting plasma glucose in patients with uncontrolled type 2  
4 diabetes (n=100)  
5  
6  
7  
8  
9  
10  
11  
12  
13  
14  
15  
16  
17  
18  
19  
20  
21  
22  
23  
24  
25  
26  
27  
28  
29  
30  
31  
32  
33  
34  
35  
36  
37  
38  
39  
40  
41  
42  
43  
44  
45  
46  
47  
48  
49  
50  
51  
52  
53  
54  
55  
56  
57  
58  
59  
60

For peer review only



**Pharmacist Intervention for Glycemic Control in the  
Community (The RxING study)**

|                                    |                                                                                                                                                                                                                                         |
|------------------------------------|-----------------------------------------------------------------------------------------------------------------------------------------------------------------------------------------------------------------------------------------|
| Journal:                           | <i>BMJ Open</i>                                                                                                                                                                                                                         |
| Manuscript ID:                     | bmjopen-2013-003154.R2                                                                                                                                                                                                                  |
| Article Type:                      | Research                                                                                                                                                                                                                                |
| Date Submitted by the Author:      | 12-Aug-2013                                                                                                                                                                                                                             |
| Complete List of Authors:          | Al Hamarneh, Yazid; University of Alberta, Medicine<br>Charrois, Theresa; Curtin University, Pharmacy<br>Lewanczuk, Richard; University of Alberta, Medicine<br>Tsuyuki, Ross; University of Alberta, Faculty of Medicine and Dentistry |
| <b>Primary Subject<br>Heading</b>: | Diabetes and endocrinology                                                                                                                                                                                                              |
| Secondary Subject Heading:         | Diabetes and endocrinology, Public health                                                                                                                                                                                               |
| Keywords:                          | Diabetes, HbA1c, Pharmacist, insulin glargine                                                                                                                                                                                           |
|                                    |                                                                                                                                                                                                                                         |

SCHOLARONE™  
Manuscripts

1  
2  
3 **Pharmacist Intervention for Glycemic Control in the Community (The RxING study)**  
4

5 Yazid N Al Hamarneh, PhD, EPICORE Centre, Division of Cardiology, Department of  
6  
7  
8 Medicine, University of Alberta  
9

10 Theresa Charrois, MSc, School of Pharmacy, Curtin University  
11

12 Richard Lewanczuk, MD, PhD, Department of Medicine, University of Alberta  
13

14  
15 Ross T Tsuyuki, PharmD, MSc, Professor of Medicine and Director, EPICORE Centre, Division  
16  
17 of Cardiology, Department of Medicine, University of Alberta (Corresponding author)  
18

19  
20 EPICORE Centre  
21

22 220 College Plaza  
23

24 University of Alberta  
25

26  
27 Edmonton, Alberta  
28

29 T6G 2C8  
30

31 Tel: 780-492-8526  
32

33 Fax: 780-492-6059  
34

35  
36 [ross.tsuyuki@ualberta.ca](mailto:ross.tsuyuki@ualberta.ca)  
37  
38  
39

40  
41 Word count: 2372  
42

43 References: 20  
44

45 Tables: 3  
46  
47

48 Figures: 3  
49  
50  
51  
52  
53  
54  
55  
56  
57  
58  
59  
60

## Abstract

Objective: To determine the effect of a community pharmacist prescribing intervention on glycemic control in patients with poorly controlled type 2 diabetes.

Design: Pragmatic, before-after design

Setting: 12 community pharmacies in Alberta, Canada.

Participants: Type 2 diabetes receiving oral hypoglycemic medications and with HbA1c of 7.5-11%

Intervention: Pharmacists systematically identified potential candidates by inviting patients with Type 2 diabetes to test their HbA1c using validated point of care technology (~~DCA-Vantage®~~). Pharmacists prescribed 10 units of insulin glargine at bedtime, adjusted by increments of 1 unit daily to achieve a morning fasting glucose of  $\leq 5.5$  mmol/L. The patients were followed at 2, 4, 8, 14, 20, and 26 weeks.

Primary outcome: Change in HbA1c from baseline to week 26.

Secondary outcomes: Proportion of patients achieving target HbA1c, changes in oral hypoglycemic agents, quality of life and patient satisfaction, persistence on insulin glargine, number of insulin dosage adjustments per patient and number of hypoglycemic episodes.

Results: We screened 365 patients of whom 111 were eligible. Of those, 100 (90%) were enrolled in the study; all 11 patients who did not consent refused to use insulin.

Average age was 64 years (~~standard deviation (SD)~~ 10.4), while average diabetes duration was 10.2 years (SD 7). HbA1c was reduced from 9.1% (SD 1) at baseline to 7.3% (SD 0.9) a change of 1.8% (95% CI 1.4-2, p<0.001). Fasting plasma glucose was reduced from 11 mmol/l (SD 3.3) to 6.9 mmol/l (SD 1.8), a change of 4.1 mmol/l (95% CI of 3.3-5, p= 0.007). Fifty one percent of the patients achieved the target HbA1c of  $\leq 7\%$  at the end of the study.

1  
2  
3 Conclusion: This is the first completed study of independent prescribing by pharmacists. Our  
4  
5 results showed similar improvements in glycaemic control as previous physician-led studies.  
6  
7

8 RxING provides further evidence for the benefit of pharmacist care in diabetes.  
9

10 Trial registration: [clinicaltrials.gov](http://clinicaltrials.gov); Identifier: NCT01335763  
11  
12  
13  
14  
15  
16  
17  
18  
19  
20  
21  
22  
23  
24  
25  
26  
27  
28  
29  
30  
31  
32  
33  
34  
35  
36  
37  
38  
39  
40  
41  
42  
43  
44  
45  
46  
47  
48  
49  
50  
51  
52  
53  
54  
55  
56  
57  
58  
59  
60

For peer review only

## Article summary

### Article focus:

To determine the effect of a community pharmacist prescribing intervention on glycaemic control in patients with poorly controlled type 2 diabetes.

### Key Messages:

- Community pharmacist prescribing intervention on glycaemic control in patients with poorly controlled type 2 diabetes reduced patients' HbA1c from 9.1% at baseline to 7.3% at 26 weeks, a change of 1.8%. While fasting plasma glucose (FPG) was reduced from 11 mmol/L at baseline to 6.9 mmol/L at 26 weeks, a change of 4.1 mmol/L
- Pharmacists can systematically identify patients with poor glycaemic control, educate and support them to achieve better outcomes
- Since pharmacists see patients with diabetes frequently, we recommend getting the pharmacists more involved in delivering the care for patients with type 2 diabetes

### Strengths and limitations of the study:

- This is the first study of independent prescribing by pharmacists in patients with diabetes and it demonstrates a clinically important improvement in glycaemic control.
- The 26 week follow up period can be considered relatively short; it is possible that with a longer study more patients may have achieved the target HbA1c (or fewer if patients discontinued their insulin).
- We did observe a number of "hypoglycaemic-type symptoms", however we were not able to confirm these as true hypoglycemia. We also have no frame of reference as patients may have experienced some of these symptoms prior to enrolling in our study. Finally,



1  
2  
3 the number of reported “hypoglycemic-type symptoms” in this study was consistent with  
4  
5 the findings reported in the literature.  
6  
7  
8  
9

10 **Financial acknowledgements:** This work was supported by unrestricted investigator-initiated  
11 funding provided by Sanofi Canada and the testing equipments were provided by ManthaMed.  
12  
13

14  
15  
16 **Role of the Sponsors:** The funders had no role in the design and conduct of the study; in the  
17 collection, analysis, and interpretation of the data; or in the preparation, review, or approval of  
18 the manuscript.  
19  
20  
21  
22  
23  
24  
25  
26  
27  
28  
29  
30  
31  
32  
33  
34  
35  
36  
37  
38  
39  
40  
41  
42  
43  
44  
45  
46  
47  
48  
49  
50  
51  
52  
53  
54  
55  
56  
57  
58  
59  
60

Peer review only

## Introduction

Currently, 347 million individuals are living with diabetes worldwide (1). Approximately 90% of those individuals have type 2 diabetes (1). The number of new cases of type 2 diabetes is rapidly increasing mainly because of obesity and an ageing population (2).

Because of its chronic nature and the severe complications associated with it, diabetes carries a health and a financial burden on the affected individual and health systems (3). Poorly controlled diabetes puts patients at high risk of suffering from macrovascular and microvascular complications (4).

Type 2 diabetes is a progressive disease; it has been reported that 50% of the insulin producing capacity is lost at the time of diagnosis with an average loss rate of 5% per year afterwards (5).

As a result, many patients with type 2 diabetes will eventually require the use of insulin; however, clinicians seem reluctant to start insulin (6) despite the evidence from studies such as INSIGHT, which demonstrated improved glycaemic control with the addition of insulin glargine to oral hypoglycaemic agents in patients with type 2 diabetes (7) as well as guidelines that recommending starting insulin immediately if the patients HbA1c is  $\geq 9\%$  (8).

Clinicians' reluctance to initiating insulin due to unfamiliarity with the treatment or using it as a last resort (9) plays a major role in influencing the patient's decision to commence insulin treatment regimen. It has been reported that many patients have 'psychological insulin resistance' where they are unwilling to take insulin because of certain beliefs that insulin will not

1  
2  
3 [be beneficial and in some cases it may even be harmful. Personal experience and messages from](#)  
4  
5 [different healthcare professionals can also affect the patient's decisions regarding insulin](#)  
6  
7 [treatment regimen \(6, 10\).](#)  
8  
9  
10  
11 -  
12  
13  
14

15 Pharmacists are front line healthcare professionals who see patients with diabetes more  
16  
17 frequently than physicians (15 times/year Vs 7 times/year) (11) and as such, could proactively  
18  
19 and systematically identify patients with poorly controlled type 2 diabetes in a broad-based  
20  
21 public health approach to chronic disease management (12). Indeed, there is good evidence for  
22  
23 the efficacy of pharmacist care in diabetes (13). [In community settings, pharmacists have](#)  
24  
25 [demonstrated that they are capable of identifying poorly controlled patients, educate patients](#)  
26  
27 [regarding diabetes, medications and self-monitoring of plasma glucose, provide adherence](#)  
28  
29 [support, identify and resolve diabetes problems and complications and setting goals in order](#)  
30  
31 [reduce the patients' HbA1c, plasma glucose and improve their quality of life and other co-](#)  
32  
33 [morbidity \(4, 12 - 16\).](#) Moreover, the scope of practice for pharmacists [in Alberta](#) is changing,  
34  
35 allowing pharmacists to prescribe medications and order laboratory tests. As such, there is an  
36  
37 unprecedented opportunity to identify and improve glycemic control in patients with type 2  
38  
39 diabetes.  
40  
41  
42  
43  
44  
45  
46  
47

48 The main aim of the RxING study was to determine the effect of a community pharmacist  
49  
50 prescribing intervention on glycemic control in patients with poorly controlled type 2 diabetes.  
51  
52  
53  
54  
55  
56  
57  
58  
59  
60

## Methods

### Study design and setting

RxING was a multicentre pragmatic before-after design trial, which was conducted in 12 community pharmacies in the province of Alberta, Canada.

We chose the before-after design because we had concerns about withholding insulin from this high risk group. Those concerns were based on guidelines recommendations (8) and the evidence from studies such as INSIGHT (7).

All participating pharmacists, who were either certified diabetes educators (CDE) or preparing to be CDE, received face to face training by the study team. The training material was based on the most recent Canadian guidelines and recommendations (7,8). They also received a manual of operations to help them conduct the study.

### Study participants

We recruited adults -who had physician diagnosed type 2 diabetes for at least six months and were receiving one or more oral hypoglycemic agents, had a HbA1c between 7.5% and 11%, and who were willing to sign an informed consent.

We excluded patients who were unwilling to use insulin, previously or currently using insulin (confirmed by the patient's medication records), had a history of ketoacidosis (confirmed by the patient's healthcare records), were pregnant, worked night shifts, had renal impairment (serum creatinine of  $\geq 124$  mmol/l for females or  $\geq 133$  mmol/l for males) (confirmed by the patient's

1  
2  
3 [healthcare records](#)), were clinically unstable ([based on the pharmacist's judgment](#)), were  
4  
5 unwilling or unable to attend follow-up visits, or felt to be unlikely to adhere to study procedures  
6  
7 due to cognitive limitations ([based on the pharmacist's judgment](#)), severe psychiatric disorders or  
8  
9 alcoholism ([confirmed by the patient's healthcare records](#)).  
10  
11  
12  
13

### 14 15 [Recruitment](#)

16  
17 Pharmacists systematically identified potential candidates [from within their practice](#) by inviting  
18  
19 patients with type 2 diabetes (e.g., patients on metformin) to test their HbA1c in the pharmacy  
20  
21 using validated point of care technology (DCA Vantage®, Siemens, Tarrytown, New York,  
22  
23 USA). If the result of the HbA1c test was high (7.5-11 %) and the patient met the other inclusion  
24  
25 criteria for the study the patient was asked if he/she wanted to participate in the study. After  
26  
27 providing written informed consent, the patient was enrolled in the study. If HbA1c was > 11%  
28  
29 the patient was assessed by the study investigators, and the patient was referred to his/her  
30  
31 physician.  
32  
33  
34  
35  
36  
37  
38

### 39 [Intervention](#)

40  
41 The patient was prescribed 10 units insulin glargine at bedtime, and was asked to titrate the dose  
42  
43 by 1 unit/day to achieve a fasting plasma glucose of  $\leq 5.5$  mmol/L (7, 17). The intervention also  
44  
45 included patient education regarding insulin use, dose titration and self monitoring. Patients  
46  
47 contacted the pharmacist when they reached a fasting plasma glucose of 6 mmol/L. All patients  
48  
49 remained on their previously prescribed oral hypoglycemic agent(s). [If the combination with](#)  
50  
51 [insulin was not approved in Canada, the oral hypoglycemic agent was discontinued \(e.g.,](#)  
52  
53 [thiazolidinedione\)](#). Adjustments were made at the discretion of the treating pharmacist [based on](#)  
54  
55  
56  
57  
58  
59  
60

1  
2  
3 | [the most recent Canadian guidelines \(8\)](#). The patient's family physician received a letter from the  
4  
5  
6 | pharmacist to inform him/her that the patient was participating in the study.  
7  
8  
9

### 10 | [Follow-up](#)

11  
12 | Patients were followed at 2, 4, 8, 14, 20, and 26 weeks to provide ongoing care, check adherence  
13  
14 | to the insulin regimen, fasting blood sugars (measured by the patient), insulin dose and titration  
15  
16 | and adverse events. HbA1c was measured at weeks 14 and 26 using the same technique used at  
17  
18 | baseline. Family physicians were kept informed of patient's progress and any medication change  
19  
20 | after each visit.  
21  
22  
23  
24  
25  
26

### 27 | [Outcomes](#)

28  
29 | The primary outcome measure was the change in HbA1c from baseline to week 26. Secondary  
30  
31 | outcomes included: Proportion of patients achieving target HbA1c (defined as  $HbA1c \leq 7.0\%$ ),  
32  
33 | changes in oral hypoglycemic agents, [quality of life and patient satisfaction using Audit of](#)  
34  
35 | [Diabetes- Dependent Quality of Life \(ADDQoL\), Diabetes Treatment Satisfaction Questionnaire](#)  
36  
37 | [\(DTSQ\) and Diabetes Treatment Satisfaction \(Change\) Questionnaire \(DTSQc\)](#), persistence on  
38  
39 | insulin glargine (% still taking insulin at the end of follow-up), number of insulin dosage  
40  
41 | adjustments per patient, number of hypoglycemic episodes.  
42  
43  
44  
45  
46  
47

### 48 | [Sample size calculation](#)

49  
50 | With a sample size of 80 patients and the following assumptions: a standard deviation of 1.1 and  
51  
52 | a 2 sided alpha of 0.05 (7) we calculated 90% power to detect a mean decrease in HbA1c of  
53  
54  
55  
56  
57  
58  
59  
60

1  
2  
3 0.4%. Since this a pragmatic, practice-based trial, the sample size was inflated to 100 to account  
4  
5 for possible losses to follow-up.  
6  
7

### 8 9 10 11 12 13 14 15 16 17 Data analysis

18  
19 The level of significance was set at 0.05. All analyses were done on intention to treat basis.

20  
21 Missing data were imputed using a last value carried forward strategy. [The mean HbA1c](#)  
22 [between baseline and 26 weeks was compared using a paired t-test. Secondary outcomes were](#)  
23 [analyzed using paired t-tests and basic frequencies. Linear regression was used to adjust for the](#)  
24 [patients' demographics and clinical characteristics.](#)  
25  
26  
27  
28  
29  
30  
31  
32  
33

34 RxING was approved by the Health Research Ethics Board of the University of Alberta and was  
35 registered on clinicaltrials.gov (NCT01335763).  
36  
37  
38  
39  
40  
41  
42  
43  
44  
45  
46  
47  
48  
49  
50  
51  
52  
53  
54  
55  
56  
57  
58  
59  
60

## Results

We screened 356 patients with type 2 diabetes; 245 were excluded because they did not meet the HbA1c inclusion criteria. Out of the 111 eligible patients, 11 were not enrolled because they refused to use insulin, leaving 100 patients enrolled (Figure 1)

The demographic and clinical characteristics of the patients are reported in Table 1. The mean age was 64 years (Standard Deviation (SD) 10.4) and had a diabetes duration of 10.2 years (SD 7). Fifty-eight percent of the patients were male, 77% were married and 90% reported having at least high school education. Nearly half of the patients (48%) were retired, almost ninety percent (89%) were white (ethnicity was self reported) and nearly half (47%) have a government medication coverage. Around one quarter of the patients (22%) reported that they were smokers, [and more than half \(54%\) reported occasional consumption of alcohol \(e.g. 1-3 drinks/week\).](#) [Nearly two thirds of the patients had elevated blood pressure \(63%\) and elevated cholesterol \(64%\) \(hypertension and high cholesterol were self reported\).](#)

All but 1 patient was taking insulin glargine at the end of the study (he stopped his insulin before the final visit because his plasma glucose readings were “good”). At the end of the study the mean insulin glargine dose was 31.1 units (SD 18.4) with a mean of 21.1 dose adjustments (SD 18.8) per patient.

HbA1c was reduced from 9.1% (SD 1) at baseline to 7.3% (SD 0.9) at 26 weeks, a change of 1.8% (95% CI 1.4-2,  $p < 0.001$ ) (Figure 2). While fasting plasma glucose (FPG) was reduced from



1  
2  
3 11 mmol/L (SD 3.3) at baseline to 6.9 mmol/L (SD 1.8) at 26 weeks, a change of 4.1 mmol/L  
4  
5 (95% CI of 3.3-5, p= 0.007) (Figure 3).  
6  
7

8  
9  
10 Fifty one percent of the patients achieved the target HbA1c of  $\leq 7\%$  at the end of the study. At  
11 baseline, two thirds (66%) of the patients were taking two or more medications (Table 2), the  
12 most widely used combination was metformin and gliclazide, followed metformin and glyburide  
13 and metformin and repaglinide. Nearly half of the patients (48%) had their oral hypoglycemic  
14  
15 regimen altered (Table 3); the most frequent alterations were stopping sulfonylurea (46%)  
16  
17 followed by initiating meglitinides (23%), stopping metformin (21%) and stopping  
18  
19 thiazolidinedione and DPP4 inhibitors (19%). Those alterations were made by the pharmacists  
20  
21 who then informed the patients' family physicians.  
22  
23  
24  
25  
26  
27  
28  
29  
30  
31

32 Only 40% of the patients returned quality of life and treatment satisfaction questionnaires. Of  
33 those, only 30 of those questionnaires were analyzable. Quality of life and treatment satisfaction  
34 have improved by 0.2 and 1.5 respectively amongst the patients who returned the questionnaires.  
35  
36  
37  
38  
39  
40  
41  
42

43 There was an apparent slight increase in the bBody mass index (BMI) and waist circumference  
44 between baseline and the end of the study was but this increase was not statistically significant  
45 (31.6 (SD 6.3) at baseline, and to 32.6 (SD 6.3) at the end of follow-up (, p=0.29), and waist  
46 circumference was and 106 cm (SD 13.8) at baseline and to 107.4 cm (SD 12.9) at the end of  
47 followup (,p=0.5 respectively).  
48  
49  
50  
51  
52  
53  
54  
55  
56  
57  
58  
59  
60

1  
2  
3  
4  
5  
6  
7  
8  
9  
10  
11  
12  
13  
14  
15  
16  
17  
18  
19  
20  
21  
22  
23  
24  
25  
26  
27  
28  
29  
30  
31  
32  
33  
34  
35  
36  
37  
38  
39  
40  
41  
42  
43  
44  
45  
46  
47  
48  
49  
50  
51  
52  
53  
54  
55  
56  
57  
58  
59  
60

“Hypoglycemic-type”-symptoms were reported by 54 patients. Only 2 of these episodes required medical attention (one caused a visit to the family physician while the other required a visit to the emergency department without an overnight stay). We were not able to confirm that these episodes were true hypoglycemia, via blood glucose measurements, nor did we have baseline information on such symptoms .

---

1  
2  
3  
4  
5  
6  
7  
8  
9  
10  
11  
12  
13  
14  
15  
16  
17  
18  
19  
20  
21  
22  
23  
24  
25  
26  
27  
28  
29  
30  
31  
32  
33  
34  
35  
36  
37  
38  
39  
40  
41  
42  
43  
44  
45  
46  
47  
48  
49  
50  
51  
52  
53  
54  
55  
56  
57  
58  
59  
60

For peer review only

## Discussion

We found that a community pharmacist prescribing intervention in patients with poorly controlled type 2 diabetes improved patients' HbA1c by an absolute value of 1.8% (95% CI 1.4-2,  $p < 0.001$ ) and fasting plasma glucose by 4.1 mmol/L (95% CI of 3.3-5,  $p = 0.007$ ). This is the first study of independent prescribing by pharmacists in patients with diabetes and represents a clinically important improvement in glycaemic control.

Our findings are consistent with the findings of Gerstein and colleagues (2006) and Harris and colleagues (2008) who compared the effect of adding insulin glargine to the oral hypoglycaemic regimen versus the conventional therapy where oral hypoglycaemic agent doses were adjusted. They reported better glycaemic control in the insulin glargine group after 26 weeks of follow up (7, 9). Our findings are also consistent with the findings of Wubben and Vivian (2008) who conducted a systematic review to assess the effectiveness of pharmacist intervention in patients with diabetes in outpatient settings. They reported additional HbA1c reduction (when compared to usual care) of 0.5% when pharmacists did not have prescribing authority and 1% when pharmacists had prescribing authority (collaborative prescribing in this case) (13).

It has been reported in the literature that the adherence rates to the insulin regimen are unsatisfactory (19); however in our study, 99% of the patients were adherent to their treatment regimen for 6 months, this can be explained by the intensive intervention provided by the pharmacist and the relatively short duration of the study.

1  
2  
3 The slight increase in BMI and waist circumference in our study is consistent with the findings  
4 of Heine and colleagues (2005) and Russell-Jones and colleagues (2009) who compared the  
5 efficacy of insulin glargine to an active diabetes treatment and reported that there was a slight  
6 increase in BMI and waist circumference in patients who used insulin glargine after 26 weeks  
7  
8  
9  
10  
11  
12  
13 ~~(20, 21).~~

14  
15  
16  
17 This study is not without limitations. The 26 week follow up period can be considered relatively  
18 short; it is possible that with a longer study more patients may have achieved the target HbA1c  
19 (or fewer if patients discontinued their insulin). Patients who were unwilling to use insulin were  
20 excluded from the study; however patients' willingness to use insulin was high in our pilot study  
21 (4) and also during the screening process. The proactive and systematic approach that we used in  
22 this study also helped in identifying patients who could benefit from insulin-. We acknowledge  
23 that adding insulin to the oral hypoglycemic agent(s) regimen is one of the options which are  
24 available to improve glycemic control; however this choice was based on the insulin's efficacy  
25 and safety profile. The response rate to quality of life and treatment satisfaction questionnaires  
26 was low; however the improvements in quality of life and treatment satisfactions are consistent  
27 with the findings of Gerstein and colleagues (2006) who reported improvements in treatment  
28 satisfaction in the insulin glargine group (7). We also received unsolicited comments from  
29 different patients highlighting their pleasure and satisfaction with treatment and its impact on  
30 their daily activities.

31  
32  
33  
34  
35  
36  
37  
38  
39  
40  
41  
42  
43  
44  
45  
46  
47  
48  
49  
50 We did observe a number of "hypoglycemic-type-like" symptoms<sup>22</sup>, however we were not able to  
51 confirm these as true hypoglycemia. We also have no frame of reference as patients may have  
52 experienced some of these symptoms prior to enrolling in our study. Finally, the number of  
53  
54  
55  
56  
57  
58  
59  
60

1  
2  
3 reported “hypoglycemic-type symptoms” in this study was consistent with the findings of a meta  
4  
5 analysis of more than 1100 diabetes patients who were using insulin glargine (20).  
6  
7

8  
9  
10 Our findings take the evidence for the benefits of pharmacist care in diabetes one step further.  
11  
12 That prescribing insulin improves glycemic control in itself is perhaps not surprising; what is  
13  
14 important is that pharmacists can systematically identify patients with poor glycemic control,  
15  
16 educate and support patients to achieve better outcomes. Since pharmacists see patients with  
17  
18 diabetes frequently (11), this can be an attractive approach.  
19  
20  
21  
22  
23  
24  
25  
26  
27  
28

29 **Acknowledgements:** The authors would like to acknowledge the participation of the following  
30  
31 pharmacists and pharmacies in making this study possible: Rick Siemens ( London Drugs,  
32  
33 Lethbridge), Darsey Milford ( Turtle Mountain Pharmacy, Bellevue), Rita Bowron, Rami  
34  
35 Chowaniec, Nader Hammoud, Carol Wei, Sheilah Kostecki ( Safeway Pharmacy, Edmonton and  
36  
37 Calgary), Anita Brown (Shoppers Drug Mart, Okotoks), Janelle Fox, Tony Nickonchuck  
38  
39 (Walmart Pharmacy Cold Lake and Peace River), Rita Lyster (Rita’s Apothecary and Home  
40  
41 Healthcare, Barrhead) and Anita and Warren Dobson (Medicine Shoppe, Calgary).  
42  
43  
44  
45

46 **Funding:** This work was supported by unrestricted investigator-initiated funding provided by  
47  
48 Sanofi Canada and the testing equipments were provided by ManthaMed.  
49  
50

51 **Role of the Sponsors:** The funders had no role in the design and conduct of the study; in the  
52  
53 collection, analysis, and interpretation of the data; or in the preparation, review, or approval of  
54  
55 the final manuscript.  
56  
57  
58  
59  
60

1  
2  
3 **Contributors:** All the authors have made substantial contributions to the manuscript. These  
4 contributions are as the following: Al Hamarneh had full access to all of the data in the study and  
5 takes responsibility for the integrity of the data and the accuracy of the data analysis. *Study*  
6 *concept and design:* Tsuyuki and Charrois. *Acquisition of data:* Tsuyuki and Al  
7 Hamarneh. *Analysis and interpretation of data:* Tsuyuki and Al Hamarneh. *Drafting of the*  
8 *manuscript:* Tsuyuki and Al Hamarneh. *Critical revision of the manuscript for important*  
9 *intellectual content:* Tsuyuki, Lewanczuk, Charrois and Al Hamarneh. *Statistical analysis:*  
10 Tsuyuki and Al Hamarneh. *Administrative, technical, and material support:* Tsuyuki,  
11 Lewanczuk, Charrois and Al Hamarneh. *Study supervision:* Tsuyuki and Lewanczuk.

12  
13  
14  
15  
16  
17  
18  
19  
20  
21  
22  
23  
24 **Competing interests:** None declared

25  
26  
27 **Ethics approval:** Health Research Ethics Board of the University of Alberta

28  
29 **Data sharing statement:** All obtained data have been analysed and reported in the manuscript.

30  
31 Any further queries can be resolved by contacting the authors  
32  
33  
34  
35  
36  
37  
38  
39  
40  
41  
42  
43  
44  
45  
46  
47  
48  
49  
50  
51  
52  
53  
54  
55  
56  
57  
58  
59  
60

**References:**

1. World Health Organization. Diabetes. 2012. Available on:  
<http://www.who.int/mediacentre/factsheets/fs312/en/> (accessed February 2013).
2. Lipscombe LL, Hux JE. Trends in diabetes prevalence, incidence and mortality in Ontario, Canada 1995-2005: a population based study. *Lancet*. 2007; 369:750-756.
3. World Health Organization. Diabetes: the cost of diabetes. 2012. Available on:  
<http://www.who.int/mediacentre/factsheets/fs236/en/> (accessed February, 2013)
4. Al Hamarneh YN, Rosenthal M, Tsuyuki RT. Glycemic control in community-dwelling patients with type 2 diabetes. *Can Pharm J*. 2012; 2: 68-69e1.
5. Lebovitz HE. Insulin secretagogues: old and new. *Diabetes Rev*. 1999; 7:139-153.
6. Polonsky WH, Jackson RA. What's so tough about taking insulin? *Clin Diabetes*. 2004; 22:147-50.
7. Gerstein HC, Yale JF, Harris SB, et al. A randomized trial of adding insulin glargine vs. avoidance of insulin in people with Type 2 diabetes on either no oral glucose-lowering agents or submaximal doses of metformin and/or sulphonylureas. The Canadian INSIGHT study. *Diabet Med*. 2006;23:736-42.



- 1  
2  
3  
4  
5  
6 8. Canadian Diabetes Association. Canadian Diabetes Association 2008 Clinical Practice  
7  
8 Guidelines for the Prevention and Management of Diabetes in Canada. Can J Diabetes.  
9  
10 2008;32:s1-s201.  
11
- 12 ~~8.9.~~ Harris S, Yale JF, Dempsey E, Gerstein H. Can family physicians help patients initiate  
13  
14 basal insulin therapy successfully? Randomized trial of patient-titrated insulin glargine  
15  
16 compared with standard oral therapy: Lessons for family practice from Canadian INSIGHT  
17  
18 trial. Can Fam Physicians. 2008; 54: 550-558.  
19  
20  
21
- 22 10. Polonsky WH, Fisher L, Guzman S et al. Psychological insulin resistance in patients with  
23  
24 type 2 diabetes. Diabetes Care. 2005; 28: 2543-2545  
25  
26  
27  
28  
29  
30  
31  
32  
33  
34  
35
- 36 ~~9.11.~~ Shiu JR, Simpson SH, Johnson JA, Tsuyuki RT. Quantifying opportunities to affect  
37  
38 diabetes management in the community. Can Pharm J. 2006; 139(3): 37-38.  
39  
40  
41  
42
- 43 12. O'Donovan Dog, Byrne S, Sahn L. The role of pharmacists in control and management of  
44  
45 type 2 diabetes mellitus; a review of the literature. J Diabetology. 2011; 1: 5-21.  
46  
47  
48  
49
- 50 ~~10.13.~~ Wubben DP, Vivian EM. Effects of pharmacist outpatient interventions on adults with  
51  
52 diabetes mellitus: a systematic review. Pharmacotherapy. 2008; 28: 421-436.  
53  
54  
55  
56  
57  
58  
59  
60

- 1  
2  
3  
4  
5  
6  
7  
8  
9  
10  
11  
12  
13  
14  
15  
16  
17  
18  
19  
20  
21  
22  
23  
24  
25  
26  
27  
28  
29  
30  
31  
32  
33  
34  
35  
36  
37  
38  
39  
40  
41  
42  
43  
44  
45  
46  
47  
48  
49  
50  
51  
52  
53  
54  
55  
56  
57  
58  
59  
60
14. [Armour CL, Taylor SJ, Houriham F et al. Implementation and evaluation of Australian pharmacists' diabetes care services. J Am Pharm Assoc. 2004; 44: 455-466.](#)
15. [Fornos JA, Andres NF, Andres JC et al. A pharmacotherapy follow-up program in patients with type-2 diabetes in community pharmacies in Spain. Pharm World Sci. 2006; 28: 65-72.](#)
16. [Krass I, Armour CL, Mitchell B, et al. The pharmacy diabetes care program: assessment of a community pharmacy diabetes service model in Australia. Diabet Med. 2007; 24: 677-683.](#)
17. [Strange P. Treat-to-target insulin titration algorithms when initiating long or intermediate acting insulin in type 2 diabetes. J Diabetes Sci Technol. 2007; 1: 540 -548.](#)
18. [Raskin P, Gylvin T, Weng W, Chaykin I. Comparison of insulin detemir and insulin glargine using a basal-bolus regimen in a randomized, controlled clinical study in patients with type 2 diabetes. Diabetes Metab Res Rev. 2009; 25: 542-548.](#)
19. [Hartman I. Insulin Analogs: Impact on Treatment Success, Satisfaction, Quality of Life, and Adherence. Clin Med Res. 2008; 6: 54-67.](#)

1  
2  
3 ~~14. Heine RJ, Van Gaal LF, Johns D, et al. Exenatide versus Insulin Glargine in Patients with~~  
4 ~~Suboptimally Controlled Type 2 Diabetes. A Randomized trial. Ann Intern Med. 2005;~~  
5 ~~143: 559-569.~~

6  
7  
8  
9  
10 ~~15. Russell Jones D, Vaag A, Schmitz O, et al. Liraglutide vs insulin glargine and placebo in~~  
11 ~~combination with metformin and sulfonylurea therapy in type 2 diabetes mellitus (LEAD-5~~  
12 ~~met+SU): a randomised controlled trial. Diabetologia. 2009; 52: 2046-2055.~~

13  
14  
15  
16  
17  
18  
19  
20 ~~16.20.~~ Rosenstock J, Dailey G, Massi-Benedetti M, et al. Reduced hypoglycemia risk with  
21 insulin glargine in type 2 diabetes. Diabetes Care. 2005; 28:950-955.  
22  
23  
24  
25  
26  
27  
28  
29  
30  
31  
32  
33  
34  
35  
36  
37  
38  
39  
40  
41  
42  
43  
44  
45  
46  
47  
48  
49  
50  
51  
52  
53  
54  
55  
56  
57  
58  
59  
60

Table 1 Demographic and clinical characteristics of the patients (N=100)

| <b>Characteristic</b>         | <b>Frequency</b> |
|-------------------------------|------------------|
| <b>Gender</b>                 |                  |
| Male                          | 58               |
| Female                        | 42               |
| <b>Marital status</b>         |                  |
| Single                        | 8                |
| Married                       | 77               |
| Divorced                      | 9                |
| Widowed                       | 6                |
| <b>Education</b>              |                  |
| Grade School                  | 10               |
| High School                   | 36               |
| Some post secondary education | 26               |
| Post secondary education      | 28               |
| <b>Employment</b>             |                  |
| Caring for family             | 1                |
| Working for profit/pay        | 36               |
| Unemployed/looking for a job  | 6                |
| Retired                       | 48               |
| Other                         | 9                |
|                               |                  |

|                                           |    |
|-------------------------------------------|----|
| <b>Self reported Ethnicity</b>            |    |
| Aboriginal/first nation                   | 1  |
| White                                     | 89 |
| South Asian                               | 1  |
| Oriental                                  | 4  |
| Other                                     | 4  |
| Declined                                  | 1  |
| <b>Medication coverage</b>                |    |
| Private                                   | 29 |
| Government                                | 47 |
| Out of pocket                             | 15 |
| Private and government                    | 7  |
| Private and out of pocket                 | 2  |
| <b>Smoking status</b>                     |    |
| Smoker                                    | 22 |
| Ex-smoker                                 | 41 |
| Non-smoker                                | 37 |
| <b>Alcohol consumption</b>                |    |
| No Alcohol                                | 43 |
| Occasional alcohol (e.g. 1-3 drinks/week) | 54 |
| 1-2 alcohol drinks per day                | 3  |
|                                           |    |

|                                       |           |
|---------------------------------------|-----------|
| <u>Self reported Hypertension</u>     |           |
| <u>Yes</u>                            | <u>63</u> |
| <u>No</u>                             | <u>36</u> |
| <u>Unknown</u>                        | <u>1</u>  |
| <u>Self reported high cholesterol</u> |           |
| <u>Yes</u>                            | <u>64</u> |
| <u>No</u>                             | <u>33</u> |
| <u>Unknown</u>                        | <u>3</u>  |

Table 2 Number of oral hypoglycemic agents used by patients and Mean HbA1c

| <u>Number of oral agents</u> | <u>Frequency</u> | <u>Mean HbA1c (SD)</u> |
|------------------------------|------------------|------------------------|
| <u>1</u>                     | <u>34</u>        | <u>8.7 (0.9)</u>       |
| <u>2</u>                     | <u>56</u>        | <u>9.1 (0.9)</u>       |
| <u>3</u>                     | <u>7</u>         | <u>9.8 (1.6)</u>       |
| <u>4</u>                     | <u>3</u>         | <u>8.7 (0.7)</u>       |

For peer review only

Table 3 Oral hypoglycemic use at baseline and the end of the study

| <b>Medication</b>        | <b>Baseline (N=100)</b> | <b>26 weeks (N=93)</b> |
|--------------------------|-------------------------|------------------------|
| <b>Metformin</b>         | 88                      | 78                     |
| <b>Sulfonylurea</b>      | 54                      | 32                     |
| <b>Meglitinides</b>      | 18                      | 29                     |
| <b>DPP4</b>              | 12                      | 3                      |
| <b>Thiazolidinedione</b> | 9                       | 0                      |



1  
2  
3  
4  
5  
6  
7  
8  
9  
10  
11  
12  
13  
14  
15  
16  
17  
18  
19  
20  
21  
22  
23  
24  
25  
26  
27  
28  
29  
30  
31  
32  
33  
34  
35  
36  
37  
38  
39  
40  
41  
42  
43  
44  
45  
46  
47  
48  
49  
50  
51  
52  
53  
54  
55  
56  
57  
58  
59  
60



Figure 1 Patients' screening and enrollment flow chart

1  
2  
3  
4  
5  
6  
7  
8  
9  
10  
11  
12  
13  
14  
15  
16  
17  
18  
19  
20  
21  
22  
23  
24  
25  
26  
27  
28  
29  
30  
31  
32  
33  
34  
35  
36  
37  
38  
39  
40  
41  
42  
43  
44  
45  
46  
47  
48  
49  
50  
51  
52  
53  
54  
55  
56  
57  
58  
59  
60

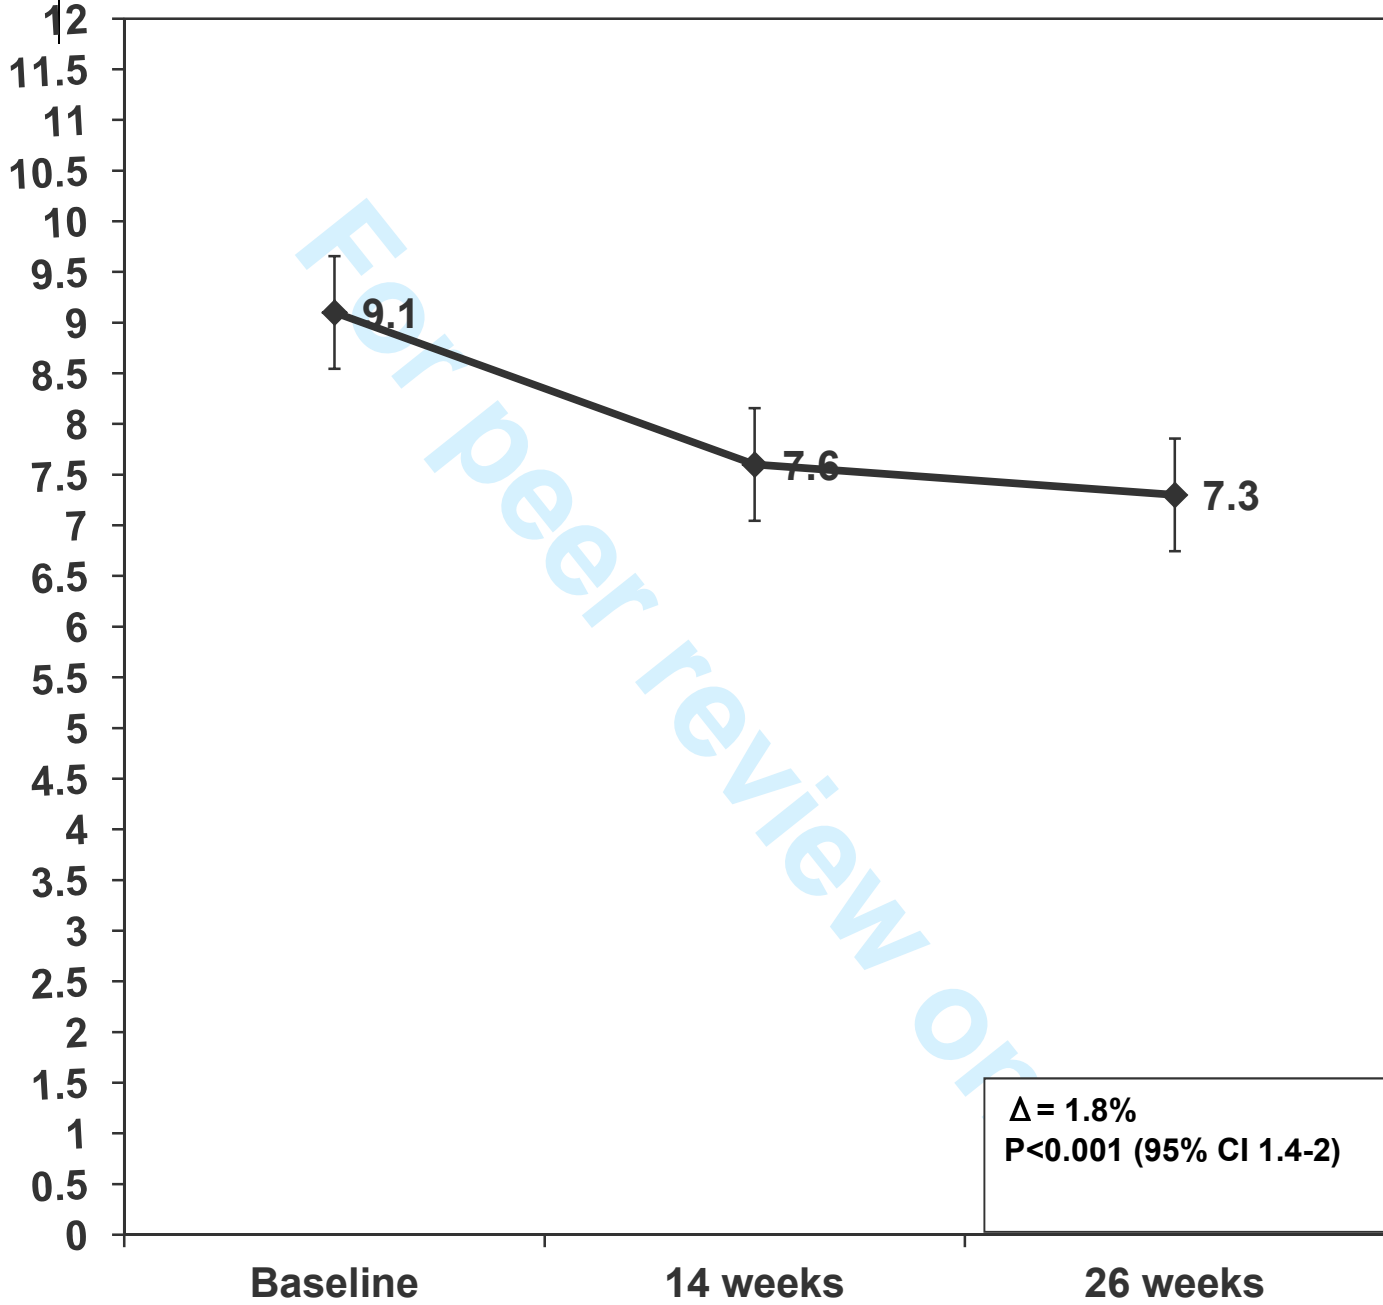

1  
2  
3  
4  
5  
6  
7  
8  
9  
10  
11  
12  
13  
14  
15  
16  
17  
18  
19  
20  
21  
22  
23  
24  
25  
26  
27  
28  
29  
30  
31  
32  
33  
34  
35  
36  
37  
38  
39  
40  
41  
42  
43  
44  
45  
46  
47  
48  
49  
50  
51  
52  
53  
54  
55  
56  
57  
58  
59  
60

Figure 2 Intervention effect on HbA1c in patients with uncontrolled type 2 diabetes (n=100)

For peer review only

---

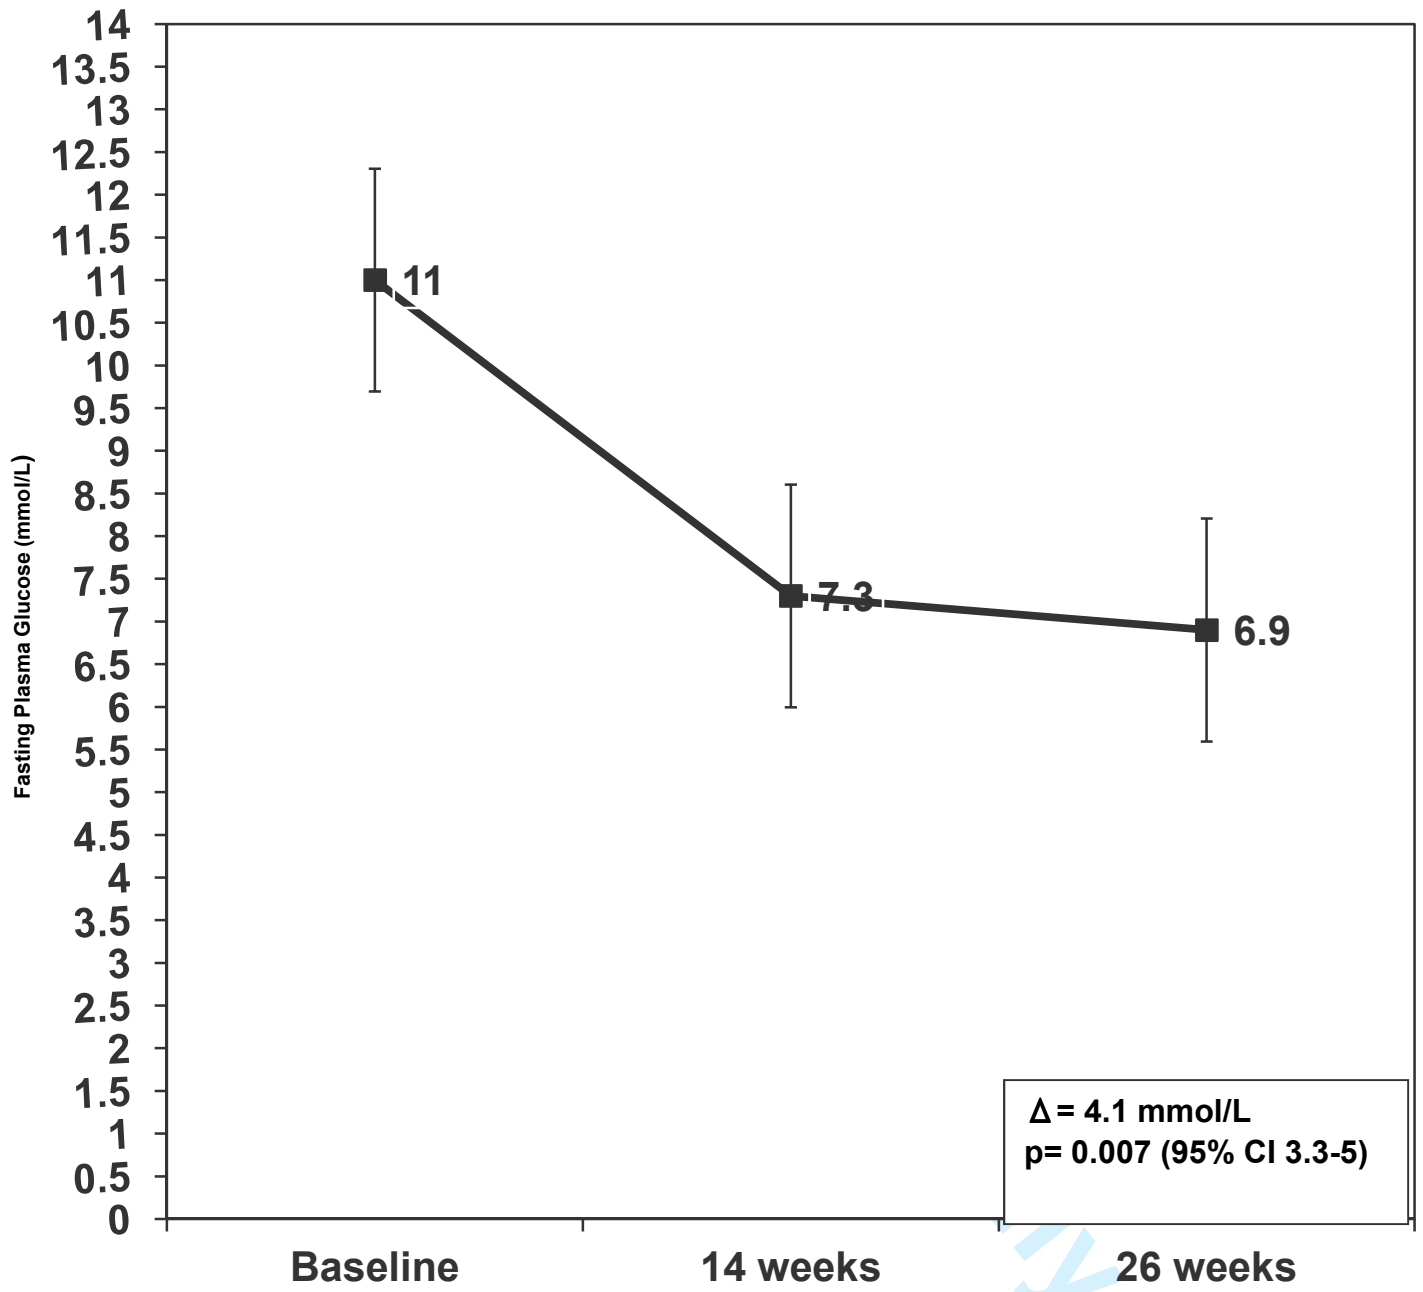

1  
2  
3  
4  
5  
6  
7  
8  
9  
10  
11  
12  
13  
14  
15  
16  
17  
18  
19  
20  
21  
22  
23  
24  
25  
26  
27  
28  
29  
30  
31  
32  
33  
34  
35  
36  
37  
38  
39  
40  
41  
42  
43  
44  
45  
46  
47  
48  
49  
50  
51  
52  
53  
54  
55  
56  
57  
58  
59  
60

Figure 3 Intervention effect on fasting plasma glucose in patients with uncontrolled type 2 diabetes (n=100)

For peer review only

1  
2  
3 **Pharmacist Intervention for Glycemic Control in the Community (The RxING study)**  
4

5 Yazid N Al Hamarneh, PhD, EPICORE Centre, Division of Cardiology, Department of  
6  
7  
8 Medicine, University of Alberta  
9

10 Theresa Charrois, MSc, School of Pharmacy, Curtin University  
11

12 Richard Lewanczuk, MD, PhD, Department of Medicine, University of Alberta  
13

14  
15 Ross T Tsuyuki, PharmD, MSc, Professor of Medicine and Director, EPICORE Centre, Division  
16  
17 of Cardiology, Department of Medicine, University of Alberta (Corresponding author)  
18

19  
20 EPICORE Centre  
21

22 220 College Plaza  
23

24 University of Alberta  
25

26 Edmonton, Alberta  
27

28  
29 T6G 2C8  
30

31 Tel: 780-492-8526  
32

33 Fax: 780-492-6059  
34

35  
36 [ross.tsuyuki@ualberta.ca](mailto:ross.tsuyuki@ualberta.ca)  
37  
38  
39

40  
41 Word count: 2372  
42

43 References: 20  
44

45 Tables: 3  
46  
47

48 Figures: 3  
49  
50  
51  
52  
53  
54  
55  
56  
57  
58  
59  
60

## Abstract

Objective: To determine the effect of a community pharmacist prescribing intervention on glycemic control in patients with poorly controlled type 2 diabetes.

Design: Pragmatic, before-after design

Setting: 12 community pharmacies in Alberta, Canada.

Participants: Type 2 diabetes receiving oral hypoglycemic medications and with HbA1c of 7.5-11%

Intervention: Pharmacists systematically identified potential candidates by inviting patients with Type 2 diabetes to test their HbA1c using validated point of care technology (~~DCA-Vantage®~~). Pharmacists prescribed 10 units of insulin glargine at bedtime, adjusted by increments of 1 unit daily to achieve a morning fasting glucose of  $\leq 5.5$  mmol/L. The patients were followed at 2, 4, 8, 14, 20, and 26 weeks.

Primary outcome: Change in HbA1c from baseline to week 26.

Secondary outcomes: Proportion of patients achieving target HbA1c, changes in oral hypoglycemic agents, quality of life and patient satisfaction, persistence on insulin glargine, number of insulin dosage adjustments per patient and number of hypoglycemic episodes.

Results: We screened 365 patients of whom 111 were eligible. Of those, 100 (90%) were enrolled in the study; all 11 patients who did not consent refused to use insulin.

Average age was 64 years (~~standard deviation (SD)~~ 10.4), while average diabetes duration was 10.2 years (SD 7). HbA1c was reduced from 9.1% (SD 1) at baseline to 7.3% (SD 0.9) a change of 1.8% (95% CI 1.4-2, p<0.001). Fasting plasma glucose was reduced from 11 mmol/l (SD 3.3) to 6.9 mmol/l (SD 1.8), a change of 4.1 mmol/l (95% CI of 3.3-5, p= 0.007). Fifty one percent of the patients achieved the target HbA1c of  $\leq 7\%$  at the end of the study.

1  
2  
3 Conclusion: This is the first completed study of independent prescribing by pharmacists. Our  
4  
5 results showed similar improvements in glycemc control as previous physician-led studies.  
6  
7

8 RxING provides further evidence for the benefit of pharmacist care in diabetes.  
9

10 Trial registration: [clinicaltrials.gov](http://clinicaltrials.gov); Identifier: NCT01335763  
11  
12  
13  
14  
15  
16  
17  
18  
19  
20  
21  
22  
23  
24  
25  
26  
27  
28  
29  
30  
31  
32  
33  
34  
35  
36  
37  
38  
39  
40  
41  
42  
43  
44  
45  
46  
47  
48  
49  
50  
51  
52  
53  
54  
55  
56  
57  
58  
59  
60

For peer review only



## Article summary

### Article focus:

To determine the effect of a community pharmacist prescribing intervention on glycaemic control in patients with poorly controlled type 2 diabetes.

### Key Messages:

- Community pharmacist prescribing intervention on glycaemic control in patients with poorly controlled type 2 diabetes reduced patients' HbA1c from 9.1% at baseline to 7.3% at 26 weeks, a change of 1.8%. While fasting plasma glucose (FPG) was reduced from 11 mmol/L at baseline to 6.9 mmol/L at 26 weeks, a change of 4.1 mmol/L
- Pharmacists can systematically identify patients with poor glycaemic control, educate and support them to achieve better outcomes
- Since pharmacists see patients with diabetes frequently, we recommend getting the pharmacists more involved in delivering the care for patients with type 2 diabetes

### Strengths and limitations of the study:

- This is the first study of independent prescribing by pharmacists in patients with diabetes and it demonstrates a clinically important improvement in glycaemic control.
- The 26 week follow up period can be considered relatively short; it is possible that with a longer study more patients may have achieved the target HbA1c (or fewer if patients discontinued their insulin).
- We did observe a number of "hypoglycaemic-type symptoms", however we were not able to confirm these as true hypoglycemia. We also have no frame of reference as patients may have experienced some of these symptoms prior to enrolling in our study. Finally,

1  
2  
3 the number of reported “hypoglycemic-type symptoms” in this study was consistent with  
4  
5 the findings reported in the literature.  
6  
7  
8  
9

10 **Financial acknowledgements:** This work was supported by unrestricted investigator-initiated  
11 funding provided by Sanofi Canada and the testing equipments were provided by ManthaMed.  
12  
13

14  
15  
16 **Role of the Sponsors:** The funders had no role in the design and conduct of the study; in the  
17 collection, analysis, and interpretation of the data; or in the preparation, review, or approval of  
18 the manuscript.  
19  
20  
21  
22  
23  
24  
25  
26  
27  
28  
29  
30  
31  
32  
33  
34  
35  
36  
37  
38  
39  
40  
41  
42  
43  
44  
45  
46  
47  
48  
49  
50  
51  
52  
53  
54  
55  
56  
57  
58  
59  
60

Peer review only

## Introduction

Currently, 347 million individuals are living with diabetes worldwide (1). Approximately 90% of those individuals have type 2 diabetes (1). The number of new cases of type 2 diabetes is rapidly increasing mainly because of obesity and an ageing population (2).

Because of its chronic nature and the severe complications associated with it, diabetes carries a health and a financial burden on the affected individual and health systems (3). Poorly controlled diabetes puts patients at high risk of suffering from macrovascular and microvascular complications (4).

Type 2 diabetes is a progressive disease; it has been reported that 50% of the insulin producing capacity is lost at the time of diagnosis with an average loss rate of 5% per year afterwards (5).

As a result, many patients with type 2 diabetes will eventually require the use of insulin; however, clinicians seem reluctant to start insulin (6) despite the evidence from studies such as INSIGHT, which demonstrated improved glycemic control with the addition of insulin glargine to oral hypoglycemic agents in patients with type 2 diabetes (7) as well as guidelines that recommending starting insulin immediately if the patients HbA1c is  $\geq 9\%$  (8).

Clinicians' reluctance to initiating insulin due to unfamiliarity with the treatment or using it as a last resort (9) plays a major role in influencing the patient's decision to commence insulin treatment regimen. It has been reported that many patients have 'psychological insulin resistance' where they are unwilling to take insulin because of certain beliefs that insulin will not

1  
2  
3 be beneficial and in some cases it may even be harmful. Personal experience and messages from  
4 different healthcare professionals can also affect the patient's decisions regarding insulin  
5 treatment regimen (6, 10).  
6  
7  
8  
9  
10  
11 -

12  
13  
14  
15 Pharmacists are front line healthcare professionals who see patients with diabetes more  
16 frequently than physicians (15 times/year Vs 7 times/year) (11) and as such, could proactively  
17 and systematically identify patients with poorly controlled type 2 diabetes in a broad-based  
18 public health approach to chronic disease management (12). Indeed, there is good evidence for  
19 the efficacy of pharmacist care in diabetes (13). In community settings, pharmacists have  
20 demonstrated that they are capable of identifying poorly controlled patients, educate patients  
21 regarding diabetes, medications and self-monitoring of plasma glucose, provide adherence  
22 support, identify and resolve diabetes problems and complications and setting goals in order  
23 reduce the patients' HbA1c, plasma glucose and improve their quality of life and other co-  
24 morbidities (4, 12 - 16). Moreover, the scope of practice for pharmacists in Alberta is changing,  
25 allowing pharmacists to prescribe medications and order laboratory tests. As such, there is an  
26 unprecedented opportunity to identify and improve glycemic control in patients with type 2  
27 diabetes.  
28  
29  
30  
31  
32  
33  
34  
35  
36  
37  
38  
39  
40  
41  
42  
43  
44  
45  
46  
47  
48  
49  
50  
51  
52  
53  
54  
55  
56  
57  
58  
59  
60

The main aim of the RxING study was to determine the effect of a community pharmacist prescribing intervention on glycemic control in patients with poorly controlled type 2 diabetes.

## Methods

### Study design and setting

RxING was a multicentre pragmatic before-after design trial, which was conducted in 12 community pharmacies in the province of Alberta, Canada.

We chose the before-after design because we had concerns about withholding insulin from this high risk group. Those concerns were based on guidelines recommendations (8) and the evidence from studies such as INSIGHT (7).

All participating pharmacists, who were either certified diabetes educators (CDE) or preparing to be CDE, received face to face training by the study team. The training material was based on the most recent Canadian guidelines and recommendations (7,8). They also received a manual of operations to help them conduct the study.

### Study participants

We recruited adults -who had physician diagnosed type 2 diabetes for at least six months and were receiving one or more oral hypoglycemic agents, had a HbA1c between 7.5% and 11%, and who were willing to sign an informed consent.

We excluded patients who were unwilling to use insulin, previously or currently using insulin (confirmed by the patient's medication records), had a history of ketoacidosis (confirmed by the patient's healthcare records), were pregnant, worked night shifts, had renal impairment (serum creatinine of  $\geq 124$  mmol/l for females or  $\geq 133$  mmol/l for males) (confirmed by the patient's

1  
2  
3 [healthcare records](#)), were clinically unstable ([based on the pharmacist's judgment](#)), were  
4  
5 unwilling or unable to attend follow-up visits, or felt to be unlikely to adhere to study procedures  
6  
7 due to cognitive limitations ([based on the pharmacist's judgment](#)), severe psychiatric disorders or  
8  
9 alcoholism ([confirmed by the patient's healthcare records](#)).  
10  
11  
12  
13

### 14 15 [Recruitment](#)

16  
17 Pharmacists systematically identified potential candidates [from within their practice](#) by inviting  
18  
19 patients with type 2 diabetes (e.g., patients on metformin) to test their HbA1c in the pharmacy  
20  
21 using validated point of care technology (DCA Vantage®, Siemens, Tarrytown, New York,  
22  
23 USA). If the result of the HbA1c test was high (7.5-11 %) and the patient met the other inclusion  
24  
25 criteria for the study the patient was asked if he/she wanted to participate in the study. After  
26  
27 providing written informed consent, the patient was enrolled in the study. If HbA1c was > 11%  
28  
29 the patient was assessed by the study investigators, and the patient was referred to his/her  
30  
31 physician.  
32  
33  
34  
35  
36  
37  
38

### 39 [Intervention](#)

40  
41 The patient was prescribed 10 units insulin glargine at bedtime, and was asked to titrate the dose  
42  
43 by 1 unit/day to achieve a fasting plasma glucose of  $\leq 5.5$  mmol/L (7, 17). The intervention also  
44  
45 included patient education regarding insulin use, dose titration and self monitoring. Patients  
46  
47 contacted the pharmacist when they reached a fasting plasma glucose of 6 mmol/L. All patients  
48  
49 remained on their previously prescribed oral hypoglycemic agent(s). [If the combination with](#)  
50  
51 [insulin was not approved in Canada, the oral hypoglycemic agent was discontinued \(e.g.,](#)  
52  
53 [thiazolidinedione\)](#). Adjustments were made at the discretion of the treating pharmacist [based on](#)  
54  
55  
56  
57  
58  
59  
60

1  
2  
3 | [the most recent Canadian guidelines \(8\)](#). The patient's family physician received a letter from the  
4  
5  
6 | pharmacist to inform him/her that the patient was participating in the study.  
7  
8  
9

#### 10 | [Follow-up](#)

11  
12 | Patients were followed at 2, 4, 8, 14, 20, and 26 weeks to provide ongoing care, check adherence  
13  
14 | to the insulin regimen, fasting blood sugars (measured by the patient), insulin dose and titration  
15  
16 | and adverse events. HbA1c was measured at weeks 14 and 26 using the same technique used at  
17  
18 | baseline. Family physicians were kept informed of patient's progress and any medication change  
19  
20 | after each visit.  
21  
22  
23  
24  
25  
26

#### 27 | [Outcomes](#)

28  
29 | The primary outcome measure was the change in HbA1c from baseline to week 26. Secondary  
30  
31 | outcomes included: Proportion of patients achieving target HbA1c (defined as  $HbA1c \leq 7.0\%$ ),  
32  
33 | changes in oral hypoglycemic agents, [quality of life and patient satisfaction using Audit of](#)  
34  
35 | [Diabetes- Dependent Quality of Life \(ADDQoL\), Diabetes Treatment Satisfaction Questionnaire](#)  
36  
37 | [\(DTSQ\) and Diabetes Treatment Satisfaction \(Change\) Questionnaire \(DTSQc\)](#), persistence on  
38  
39 | insulin glargine (% still taking insulin at the end of follow-up), number of insulin dosage  
40  
41 | adjustments per patient, number of hypoglycemic episodes.  
42  
43  
44  
45  
46  
47

#### 48 | [Sample size calculation](#)

49  
50 | With a sample size of 80 patients and the following assumptions: a standard deviation of 1.1 and  
51  
52 | a 2 sided alpha of 0.05 (7) we calculated 90% power to detect a mean decrease in HbA1c of  
53  
54  
55  
56  
57  
58  
59  
60

1  
2  
3 0.4%. Since this a pragmatic, practice-based trial, the sample size was inflated to 100 to account  
4  
5 for possible losses to follow-up.  
6  
7

### 8 9 10 11 12 13 14 15 16 17 Data analysis

18  
19 The level of significance was set at 0.05. All analyses were done on intention to treat basis.

20  
21 Missing data were imputed using a last value carried forward strategy. [The mean HbA1c](#)  
22 [between baseline and 26 weeks was compared using a paired t-test. Secondary outcomes were](#)  
23 [analyzed using paired t-tests and basic frequencies. Linear regression was used to adjust for the](#)  
24 [patients' demographics and clinical characteristics.](#)  
25  
26  
27  
28  
29  
30  
31  
32  
33

34 RxING was approved by the Health Research Ethics Board of the University of Alberta and was  
35 registered on clinicaltrials.gov (NCT01335763).  
36  
37  
38  
39  
40  
41  
42  
43  
44  
45  
46  
47  
48  
49  
50  
51  
52  
53  
54  
55  
56  
57  
58  
59  
60



## Results

We screened 356 patients with type 2 diabetes; 245 were excluded because they did not meet the HbA1c inclusion criteria. Out of the 111 eligible patients, 11 were not enrolled because they refused to use insulin, leaving 100 patients enrolled (Figure 1)

The demographic and clinical characteristics of the patients are reported in Table 1. The mean age was 64 years (Standard Deviation (SD) 10.4) and had a diabetes duration of 10.2 years (SD 7). Fifty-eight percent of the patients were male, 77% were married and 90% reported having at least high school education. Nearly half of the patients (48%) were retired, almost ninety percent (89%) were white (ethnicity was self reported) and nearly half (47%) have a government medication coverage. Around one quarter of the patients (22%) reported that they were smokers, [and more than half \(54%\) reported occasional consumption of alcohol \(e.g. 1-3 drinks/week\).](#) [Nearly two thirds of the patients had elevated blood pressure \(63%\) and elevated cholesterol \(64%\) \(hypertension and high cholesterol were self reported\).](#)

All but 1 patient was taking insulin glargine at the end of the study (he stopped his insulin before the final visit because his plasma glucose readings were “good”). At the end of the study the mean insulin glargine dose was 31.1 units (SD 18.4) with a mean of 21.1 dose adjustments (SD 18.8) per patient.

HbA1c was reduced from 9.1% (SD 1) at baseline to 7.3% (SD 0.9) at 26 weeks, a change of 1.8% (95% CI 1.4-2,  $p < 0.001$ ) (Figure 2). While fasting plasma glucose (FPG) was reduced from

1  
2  
3 11 mmol/L (SD 3.3) at baseline to 6.9 mmol/L (SD 1.8) at 26 weeks, a change of 4.1 mmol/L  
4  
5 (95% CI of 3.3-5, p= 0.007) (Figure 3).  
6  
7

8  
9  
10 Fifty one percent of the patients achieved the target HbA1c of  $\leq 7\%$  at the end of the study. At  
11 baseline, two thirds (66%) of the patients were taking two or more medications (Table 2), the  
12 most widely used combination was metformin and gliclazide, followed metformin and glyburide  
13 and metformin and repaglinide. Nearly half of the patients (48%) had their oral hypoglycemic  
14  
15 regimen altered (Table 3); the most frequent alterations were stopping sulfonylurea (46%)  
16  
17 followed by initiating meglitinides (23%), stopping metformin (21%) and stopping  
18  
19 thiazolidinedione and DPP4 inhibitors (19%). Those alterations were made by the pharmacists  
20  
21 who then informed the patients' family physicians.  
22  
23  
24  
25  
26  
27  
28

29  
30  
31 Only 40% of the patients returned quality of life and treatment satisfaction questionnaires. Of  
32 those, only 30 of those questionnaires were analyzable. Quality of life and treatment satisfaction  
33 have improved by 0.2 and 1.5 respectively amongst the patients who returned the questionnaires.  
34  
35  
36  
37  
38  
39  
40  
41  
42

43 There was an apparent slight increase in the bBody mass index (BMI) and waist circumference  
44 between baseline and the end of the study was but this increase was not statistically significant  
45 (31.6 (SD 6.3) at baseline, and to 32.6 (SD 6.3) at the end of follow-up (, p=0.29), and waist  
46 circumference was and 106 cm (SD 13.8) at baseline and to 107.4 cm (SD 12.9) at the end of  
47 followup (, p=0.5 respectively).  
48  
49  
50  
51  
52  
53  
54  
55  
56  
57  
58  
59  
60

1  
2  
3 “Hypoglycemic-type”-symptoms were reported by 54 patients. Only 2 of these episodes required  
4  
5  
6 medical attention (one caused a visit to the family physician while the other required a visit to  
7  
8 the emergency department without an overnight stay). We were not able to confirm that these  
9  
10 episodes were true hypoglycemia, via blood glucose measurements, nor did we have baseline  
11  
12 information on such symptoms .  
13  
14  
15  
16  
17  
18  
19  
20  
21  
22  
23  
24  
25  
26  
27  
28  
29  
30  
31  
32  
33  
34  
35  
36  
37  
38  
39  
40  
41  
42  
43  
44  
45  
46  
47  
48  
49  
50  
51  
52  
53  
54  
55  
56  
57  
58  
59  
60

1  
2  
3  
4  
5  
6  
7  
8  
9  
10  
11  
12  
13  
14  
15  
16  
17  
18  
19  
20  
21  
22  
23  
24  
25  
26  
27  
28  
29  
30  
31  
32  
33  
34  
35  
36  
37  
38  
39  
40  
41  
42  
43  
44  
45  
46  
47  
48  
49  
50  
51  
52  
53  
54  
55  
56  
57  
58  
59  
60

For peer review only

## Discussion

We found that a community pharmacist prescribing intervention in patients with poorly controlled type 2 diabetes improved patients' HbA1c by an absolute value of 1.8% (95% CI 1.4-2,  $p < 0.001$ ) and fasting plasma glucose by 4.1 mmol/L (95% CI of 3.3-5,  $p = 0.007$ ). This is the first study of independent prescribing by pharmacists in patients with diabetes and represents a clinically important improvement in glycaemic control.

Our findings are consistent with the findings of Gerstein and colleagues (2006) and Harris and colleagues (2008) who compared the effect of adding insulin glargine to the oral hypoglycaemic regimen versus the conventional therapy where oral hypoglycaemic agent doses were adjusted. They reported better glycaemic control in the insulin glargine group after 26 weeks of follow up (7, 9). Our findings are also consistent with the findings of Wubben and Vivian (2008) who conducted a systematic review to assess the effectiveness of pharmacist intervention in patients with diabetes in outpatient settings. They reported additional HbA1c reduction (when compared to usual care) of 0.5% when pharmacists did not have prescribing authority and 1% when pharmacists had prescribing authority (collaborative prescribing in this case) (13).

It has been reported in the literature that the adherence rates to the insulin regimen are unsatisfactory (19); however in our study, 99% of the patients were adherent to their treatment regimen for 6 months, this can be explained by the intensive intervention provided by the pharmacist and the relatively short duration of the study.

1  
2  
3 The slight increase in BMI and waist circumference in our study is consistent with the findings  
4 of Heine and colleagues (2005) and Russell-Jones and colleagues (2009) who compared the  
5 efficacy of insulin glargine to an active diabetes treatment and reported that there was a slight  
6 increase in BMI and waist circumference in patients who used insulin glargine after 26 weeks  
7  
8  
9  
10  
11  
12  
13 ~~(20, 21).~~

14  
15  
16  
17 This study is not without limitations. The 26 week follow up period can be considered relatively  
18 short; it is possible that with a longer study more patients may have achieved the target HbA1c  
19 (or fewer if patients discontinued their insulin). Patients who were unwilling to use insulin were  
20 excluded from the study; however patients' willingness to use insulin was high in our pilot study  
21 (4) and also during the screening process. The proactive and systematic approach that we used in  
22 this study also helped in identifying patients who could benefit from insulin-. We acknowledge  
23 that adding insulin to the oral hypoglycemic agent(s) regimen is one of the options which are  
24 available to improve glycemic control; however this choice was based on the insulin's efficacy  
25 and safety profile. The response rate to quality of life and treatment satisfaction questionnaires  
26 was low; however the improvements in quality of life and treatment satisfactions are consistent  
27 with the findings of Gerstein and colleagues (2006) who reported improvements in treatment  
28 satisfaction in the insulin glargine group (7). We also received unsolicited comments from  
29 different patients highlighting their pleasure and satisfaction with treatment and its impact on  
30 their daily activities.

31  
32  
33  
34  
35  
36  
37  
38  
39  
40  
41  
42  
43  
44  
45  
46  
47  
48  
49  
50 We did observe a number of "hypoglycemic-type-like" symptoms<sup>22</sup>, however we were not able to  
51 confirm these as true hypoglycemia. We also have no frame of reference as patients may have  
52 experienced some of these symptoms prior to enrolling in our study. Finally, the number of  
53  
54  
55  
56  
57  
58  
59  
60

1  
2  
3 reported “hypoglycemic-type symptoms” in this study was consistent with the findings of a meta  
4  
5 analysis of more than 1100 diabetes patients who were using insulin glargine (20).  
6  
7  
8  
9

10 Our findings take the evidence for the benefits of pharmacist care in diabetes one step further.  
11  
12 That prescribing insulin improves glycemic control in itself is perhaps not surprising; what is  
13  
14 important is that pharmacists can systematically identify patients with poor glycemic control,  
15  
16 educate and support patients to achieve better outcomes. Since pharmacists see patients with  
17  
18 diabetes frequently (11), this can be an attractive approach.  
19  
20  
21  
22  
23  
24  
25  
26  
27  
28

29 **Acknowledgements:** The authors would like to acknowledge the participation of the following  
30  
31 pharmacists and pharmacies in making this study possible: Rick Siemens ( London Drugs,  
32  
33 Lethbridge), Darsey Milford ( Turtle Mountain Pharmacy, Bellevue), Rita Bowron, Rami  
34  
35 Chowaniec, Nader Hammoud, Carol Wei, Sheilah Kostecki ( Safeway Pharmacy, Edmonton and  
36  
37 Calgary), Anita Brown (Shoppers Drug Mart, Okotoks), Janelle Fox, Tony Nickonchuck  
38  
39 (Walmart Pharmacy Cold Lake and Peace River), Rita Lyster (Rita’s Apothecary and Home  
40  
41 Healthcare, Barrhead) and Anita and Warren Dobson (Medicine Shoppe, Calgary).  
42  
43  
44  
45

46 **Funding:** This work was supported by unrestricted investigator-initiated funding provided by  
47  
48 Sanofi Canada and the testing equipments were provided by ManthaMed.  
49  
50

51 **Role of the Sponsors:** The funders had no role in the design and conduct of the study; in the  
52  
53 collection, analysis, and interpretation of the data; or in the preparation, review, or approval of  
54  
55 the final manuscript.  
56  
57  
58  
59  
60

1  
2  
3 **Contributors:** All the authors have made substantial contributions to the manuscript. These  
4 contributions are as the following: Al Hamarneh had full access to all of the data in the study and  
5 takes responsibility for the integrity of the data and the accuracy of the data analysis. *Study*  
6 *concept and design:* Tsuyuki and Charrois. *Acquisition of data:* Tsuyuki and Al  
7 Hamarneh. *Analysis and interpretation of data:* Tsuyuki and Al Hamarneh. *Drafting of the*  
8 *manuscript:* Tsuyuki and Al Hamarneh. *Critical revision of the manuscript for important*  
9 *intellectual content:* Tsuyuki, Lewanczuk, Charrois and Al Hamarneh. *Statistical analysis:*  
10 Tsuyuki and Al Hamarneh. *Administrative, technical, and material support:* Tsuyuki,  
11 Lewanczuk, Charrois and Al Hamarneh. *Study supervision:* Tsuyuki and Lewanczuk.

12  
13  
14  
15  
16  
17  
18  
19  
20  
21  
22  
23  
24 **Competing interests:** None declared

25  
26  
27 **Ethics approval:** Health Research Ethics Board of the University of Alberta

28  
29 **Data sharing statement:** All obtained data have been analysed and reported in the manuscript.

30  
31 Any further queries can be resolved by contacting the authors  
32  
33  
34  
35  
36  
37  
38  
39  
40  
41  
42  
43  
44  
45  
46  
47  
48  
49  
50  
51  
52  
53  
54  
55  
56  
57  
58  
59  
60



**References:**

1. World Health Organization. Diabetes. 2012. Available on:  
<http://www.who.int/mediacentre/factsheets/fs312/en/> (accessed February 2013).
2. Lipscombe LL, Hux JE. Trends in diabetes prevalence, incidence and mortality in Ontario, Canada 1995-2005: a population based study. *Lancet*. 2007; 369:750-756.
3. World Health Organization. Diabetes: the cost of diabetes. 2012. Available on:  
<http://www.who.int/mediacentre/factsheets/fs236/en/> (accessed February, 2013)
4. Al Hamarneh YN, Rosenthal M, Tsuyuki RT. Glycemic control in community-dwelling patients with type 2 diabetes. *Can Pharm J*. 2012; 2: 68-69e1.
5. Lebovitz HE. Insulin secretagogues: old and new. *Diabetes Rev*. 1999; 7:139-153.
6. Polonsky WH, Jackson RA. What's so tough about taking insulin? *Clin Diabetes*. 2004; 22:147-50.
7. Gerstein HC, Yale JF, Harris SB, et al. A randomized trial of adding insulin glargine vs. avoidance of insulin in people with Type 2 diabetes on either no oral glucose-lowering agents or submaximal doses of metformin and/or sulphonylureas. The Canadian INSIGHT study. *Diabet Med*. 2006;23:736-42.

- 1  
2  
3  
4  
5  
6 8. Canadian Diabetes Association. Canadian Diabetes Association 2008 Clinical Practice  
7  
8 Guidelines for the Prevention and Management of Diabetes in Canada. Can J Diabetes.  
9  
10 2008;32:s1-s201.  
11
- 12 ~~8.9.~~ Harris S, Yale JF, Dempsey E, Gerstein H. Can family physicians help patients initiate  
13  
14 basal insulin therapy successfully? Randomized trial of patient-titrated insulin glargine  
15  
16 compared with standard oral therapy: Lessons for family practice from Canadian INSIGHT  
17  
18 trial. Can Fam Physicians. 2008; 54: 550-558.  
19  
20  
21
- 22 10. Polonsky WH, Fisher L, Guzman S et al. Psychological insulin resistance in patients with  
23  
24 type 2 diabetes. Diabetes Care. 2005; 28: 2543-2545  
25  
26  
27  
28  
29  
30  
31  
32  
33  
34  
35
- 36 ~~9.11.~~ Shiu JR, Simpson SH, Johnson JA, Tsuyuki RT. Quantifying opportunities to affect  
37  
38 diabetes management in the community. Can Pharm J. 2006; 139(3): 37-38.  
39  
40  
41  
42
- 43 12. O'Donovan Dog, Byrne S, Sahn L. The role of pharmacists in control and management of  
44  
45 type 2 diabetes mellitus; a review of the literature. J Diabetology. 2011; 1: 5-21.  
46  
47  
48  
49
- 50 ~~10.13.~~ Wubben DP, Vivian EM. Effects of pharmacist outpatient interventions on adults with  
51  
52 diabetes mellitus: a systematic review. Pharmacotherapy. 2008; 28: 421-436.  
53  
54  
55  
56  
57  
58  
59  
60

- 1  
2  
3  
4  
5  
6  
7  
8  
9  
10  
11  
12  
13  
14  
15  
16  
17  
18  
19  
20  
21  
22  
23  
24  
25  
26  
27  
28  
29  
30  
31  
32  
33  
34  
35  
36  
37  
38  
39  
40  
41  
42  
43  
44  
45  
46  
47  
48  
49  
50  
51  
52  
53  
54  
55  
56  
57  
58  
59  
60
14. [Armour CL, Taylor SJ, Houriham F et al. Implementation and evaluation of Australian pharmacists' diabetes care services. J Am Pharm Assoc. 2004; 44: 455-466.](#)
15. [Fornos JA, Andres NF, Andres JC et al. A pharmacotherapy follow-up program in patients with type-2 diabetes in community pharmacies in Spain. Pharm World Sci. 2006; 28: 65-72.](#)
16. [Krass I, Armour CL, Mitchell B, et al. The pharmacy diabetes care program: assessment of a community pharmacy diabetes service model in Australia. Diabet Med. 2007; 24: 677-683.](#)
17. [Strange P. Treat-to-target insulin titration algorithms when initiating long or intermediate acting insulin in type 2 diabetes. J Diabetes Sci Technol. 2007; 1: 540 -548.](#)
18. [Raskin P, Gylvin T, Weng W, Chaykin I. Comparison of insulin detemir and insulin glargine using a basal-bolus regimen in a randomized, controlled clinical study in patients with type 2 diabetes. Diabetes Metab Res Rev. 2009; 25: 542-548.](#)
19. [Hartman I. Insulin Analogs: Impact on Treatment Success, Satisfaction, Quality of Life, and Adherence. Clin Med Res. 2008; 6: 54-67.](#)

1  
2  
3 14. ~~Heine RJ, Van Gaal LF, Johns D, et al. Exenatide versus Insulin Glargine in Patients with~~  
4 ~~Suboptimally Controlled Type 2 Diabetes. A Randomized trial. Ann Intern Med. 2005;~~  
5 ~~143: 559-569.~~  
6  
7  
8

9  
10 15. ~~Russell Jones D, Vaag A, Schmitz O, et al. Liraglutide vs insulin glargine and placebo in~~  
11 ~~combination with metformin and sulfonylurea therapy in type 2 diabetes mellitus (LEAD-5~~  
12 ~~met+SU): a randomised controlled trial. Diabetologia. 2009; 52: 2046-2055.~~  
13  
14  
15  
16

17  
18  
19  
20 16.20. Rosenstock J, Dailey G, Massi-Benedetti M, et al. Reduced hypoglycemia risk with  
21 insulin glargine in type 2 diabetes. Diabetes Care. 2005; 28:950-955.  
22  
23  
24  
25  
26  
27  
28  
29  
30  
31  
32  
33  
34  
35  
36  
37  
38  
39  
40  
41  
42  
43  
44  
45  
46  
47  
48  
49  
50  
51  
52  
53  
54  
55  
56  
57  
58  
59  
60

Table 1 Demographic and clinical characteristics of the patients (N=100)

| <b>Characteristic</b>         | <b>Frequency</b> |
|-------------------------------|------------------|
| <b>Gender</b>                 |                  |
| Male                          | 58               |
| Female                        | 42               |
| <b>Marital status</b>         |                  |
| Single                        | 8                |
| Married                       | 77               |
| Divorced                      | 9                |
| Widowed                       | 6                |
| <b>Education</b>              |                  |
| Grade School                  | 10               |
| High School                   | 36               |
| Some post secondary education | 26               |
| Post secondary education      | 28               |
| <b>Employment</b>             |                  |
| Caring for family             | 1                |
| Working for profit/pay        | 36               |
| Unemployed/looking for a job  | 6                |
| Retired                       | 48               |
| Other                         | 9                |
|                               |                  |

|                                           |    |
|-------------------------------------------|----|
| <b>Self reported Ethnicity</b>            |    |
| Aboriginal/first nation                   | 1  |
| White                                     | 89 |
| South Asian                               | 1  |
| Oriental                                  | 4  |
| Other                                     | 4  |
| Declined                                  | 1  |
| <b>Medication coverage</b>                |    |
| Private                                   | 29 |
| Government                                | 47 |
| Out of pocket                             | 15 |
| Private and government                    | 7  |
| Private and out of pocket                 | 2  |
| <b>Smoking status</b>                     |    |
| Smoker                                    | 22 |
| Ex-smoker                                 | 41 |
| Non-smoker                                | 37 |
| <b>Alcohol consumption</b>                |    |
| No Alcohol                                | 43 |
| Occasional alcohol (e.g. 1-3 drinks/week) | 54 |
| 1-2 alcohol drinks per day                | 3  |
|                                           |    |

1  
2  
3  
4  
5  
6  
7  
8  
9  
10  
11  
12  
13  
14  
15  
16  
17  
18  
19  
20  
21  
22  
23  
24  
25  
26  
27  
28  
29  
30  
31  
32  
33  
34  
35  
36  
37  
38  
39  
40  
41  
42  
43  
44  
45  
46  
47  
48  
49  
50  
51  
52  
53  
54  
55  
56  
57  
58  
59  
60

|                                       |           |
|---------------------------------------|-----------|
| <u>Self reported Hypertension</u>     |           |
| <u>Yes</u>                            | <u>63</u> |
| <u>No</u>                             | <u>36</u> |
| <u>Unknown</u>                        | <u>1</u>  |
| <u>Self reported high cholesterol</u> |           |
| <u>Yes</u>                            | <u>64</u> |
| <u>No</u>                             | <u>33</u> |
| <u>Unknown</u>                        | <u>3</u>  |

For peer review only

1  
2  
3  
4  
5  
6  
7  
8  
9  
10  
11  
12  
13  
14  
15  
16  
17  
18  
19  
20  
21  
22  
23  
24  
25  
26  
27  
28  
29  
30  
31  
32  
33  
34  
35  
36  
37  
38  
39  
40  
41  
42  
43  
44  
45  
46  
47  
48  
49  
50  
51  
52  
53  
54  
55  
56  
57  
58  
59  
60

Table 2 Number of oral hypoglycemic agents used by patients and Mean HbA1c

| <u>Number of oral agents</u> | <u>Frequency</u> | <u>Mean HbA1c (SD)</u> |
|------------------------------|------------------|------------------------|
| <u>1</u>                     | <u>34</u>        | <u>8.7 (0.9)</u>       |
| <u>2</u>                     | <u>56</u>        | <u>9.1 (0.9)</u>       |
| <u>3</u>                     | <u>7</u>         | <u>9.8 (1.6)</u>       |
| <u>4</u>                     | <u>3</u>         | <u>8.7 (0.7)</u>       |



Table 3 Oral hypoglycemic use at baseline and the end of the study

| <b>Medication</b>        | <b>Baseline (N=100)</b> | <b>26 weeks (N=93)</b> |
|--------------------------|-------------------------|------------------------|
| <b>Metformin</b>         | 88                      | 78                     |
| <b>Sulfonylurea</b>      | 54                      | 32                     |
| <b>Meglitinides</b>      | 18                      | 29                     |
| <b>DPP4</b>              | 12                      | 3                      |
| <b>Thiazolidinedione</b> | 9                       | 0                      |

1  
2  
3  
4  
5  
6  
7  
8  
9  
10  
11  
12  
13  
14  
15  
16  
17  
18  
19  
20  
21  
22  
23  
24  
25  
26  
27  
28  
29  
30  
31  
32  
33  
34  
35  
36  
37  
38  
39  
40  
41  
42  
43  
44  
45  
46  
47  
48  
49  
50  
51  
52  
53  
54  
55  
56  
57  
58  
59  
60



Figure 1 Patients' screening and enrollment flow chart

---

1  
2  
3  
4  
5  
6  
7  
8  
9  
10  
11  
12  
13  
14  
15  
16  
17  
18  
19  
20  
21  
22  
23  
24  
25  
26  
27  
28  
29  
30  
31  
32  
33  
34  
35  
36  
37  
38  
39  
40  
41  
42  
43  
44  
45  
46  
47  
48  
49  
50  
51  
52  
53  
54  
55  
56  
57  
58  
59  
60



1  
2  
3 Figure 2 Intervention effect on HbA1c in patients with uncontrolled type 2 diabetes (n=100)  
4  
5  
6  
7  
8  
9  
10  
11  
12  
13  
14  
15  
16  
17  
18  
19  
20  
21  
22  
23  
24  
25  
26  
27  
28  
29  
30  
31  
32  
33  
34  
35  
36  
37  
38  
39  
40  
41  
42  
43  
44  
45  
46  
47  
48  
49  
50  
51  
52  
53  
54  
55  
56  
57  
58  
59  
60

---

For peer review only

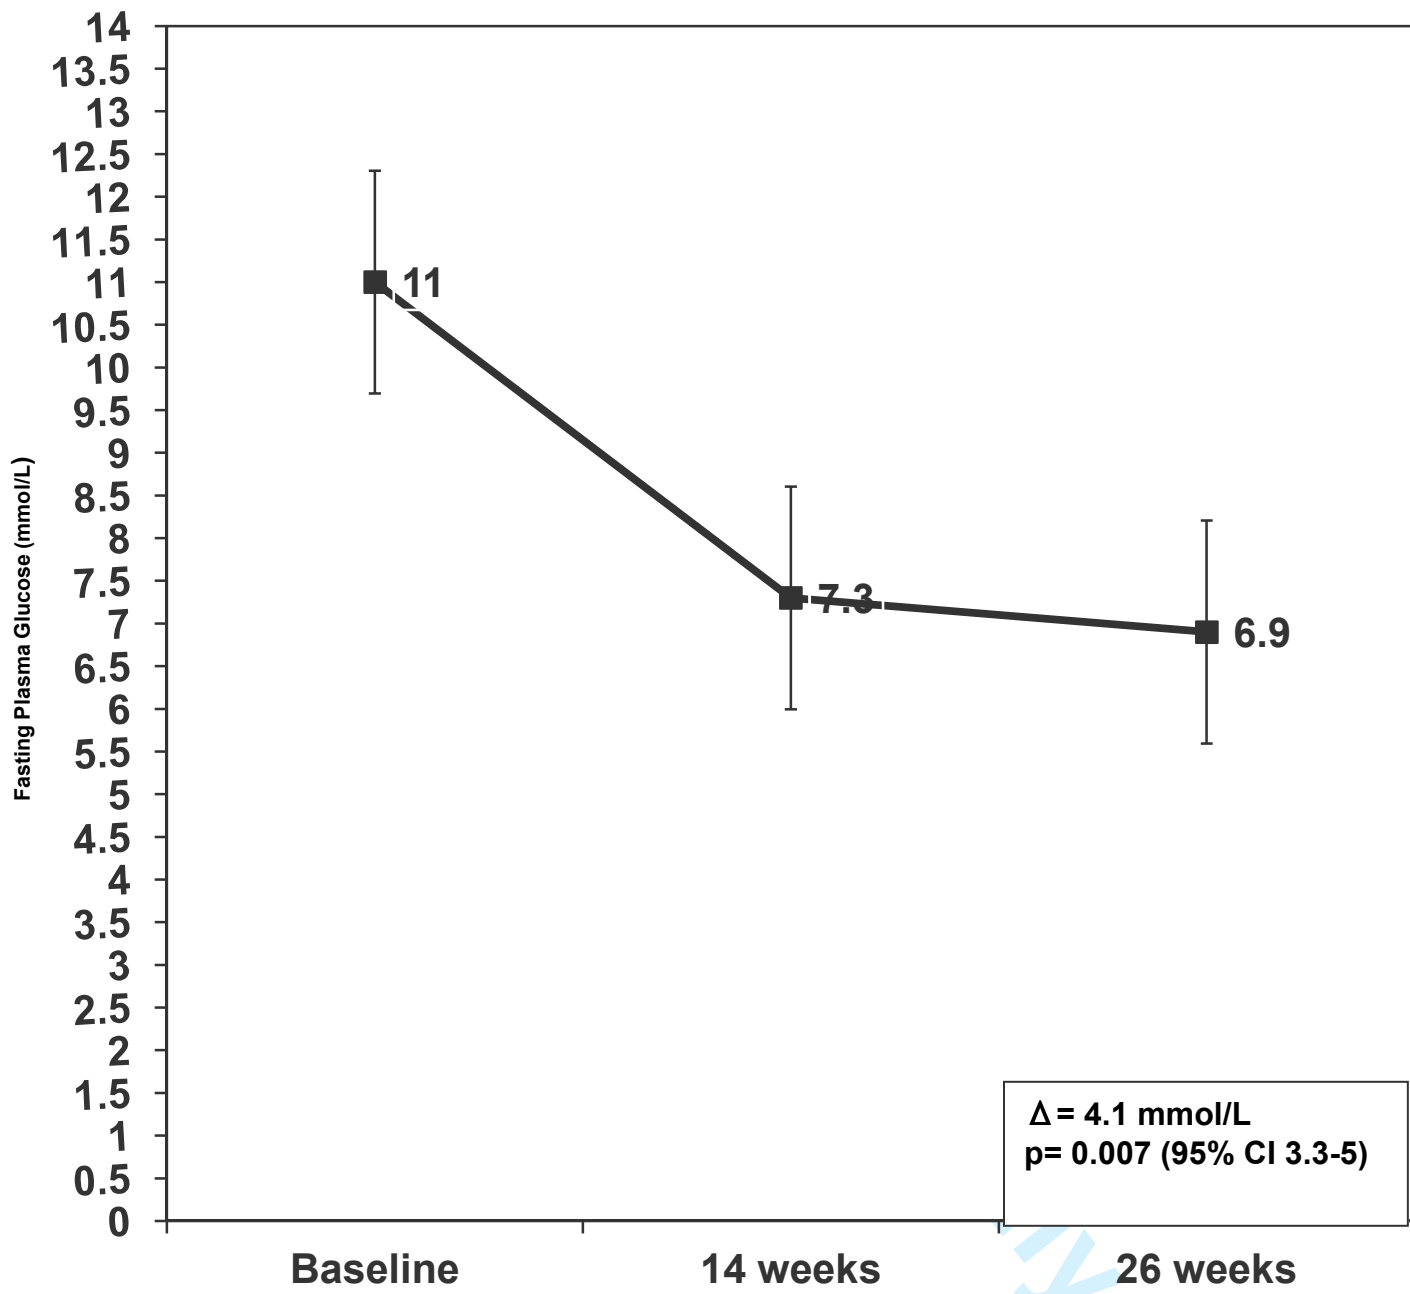

1  
2  
3  
4  
5  
6  
7  
8  
9  
10  
11  
12  
13  
14  
15  
16  
17  
18  
19  
20  
21  
22  
23  
24  
25  
26  
27  
28  
29  
30  
31  
32  
33  
34  
35  
36  
37  
38  
39  
40  
41  
42  
43  
44  
45  
46  
47  
48  
49  
50  
51  
52  
53  
54  
55  
56  
57  
58  
59  
60

1  
2  
3 Figure 3 Intervention effect on fasting plasma glucose in patients with uncontrolled type 2  
4  
5 diabetes (n=100)  
6  
7  
8  
9  
10  
11  
12  
13  
14  
15  
16  
17  
18  
19  
20  
21  
22  
23  
24  
25  
26  
27  
28  
29  
30  
31  
32  
33  
34  
35  
36  
37  
38  
39  
40  
41  
42  
43  
44  
45  
46  
47  
48  
49  
50  
51  
52  
53  
54  
55  
56  
57  
58  
59  
60

For peer review only
